# Supplementary material for: RNA-Seq analysis of chikungunya virus infection and identification of granzyme A as a major promoter of arthritic inflammation
Source: PLOS journal article supplement (doi:10.1371/journal.ppat.1006155), 2017-02-16

## S2 Fig.

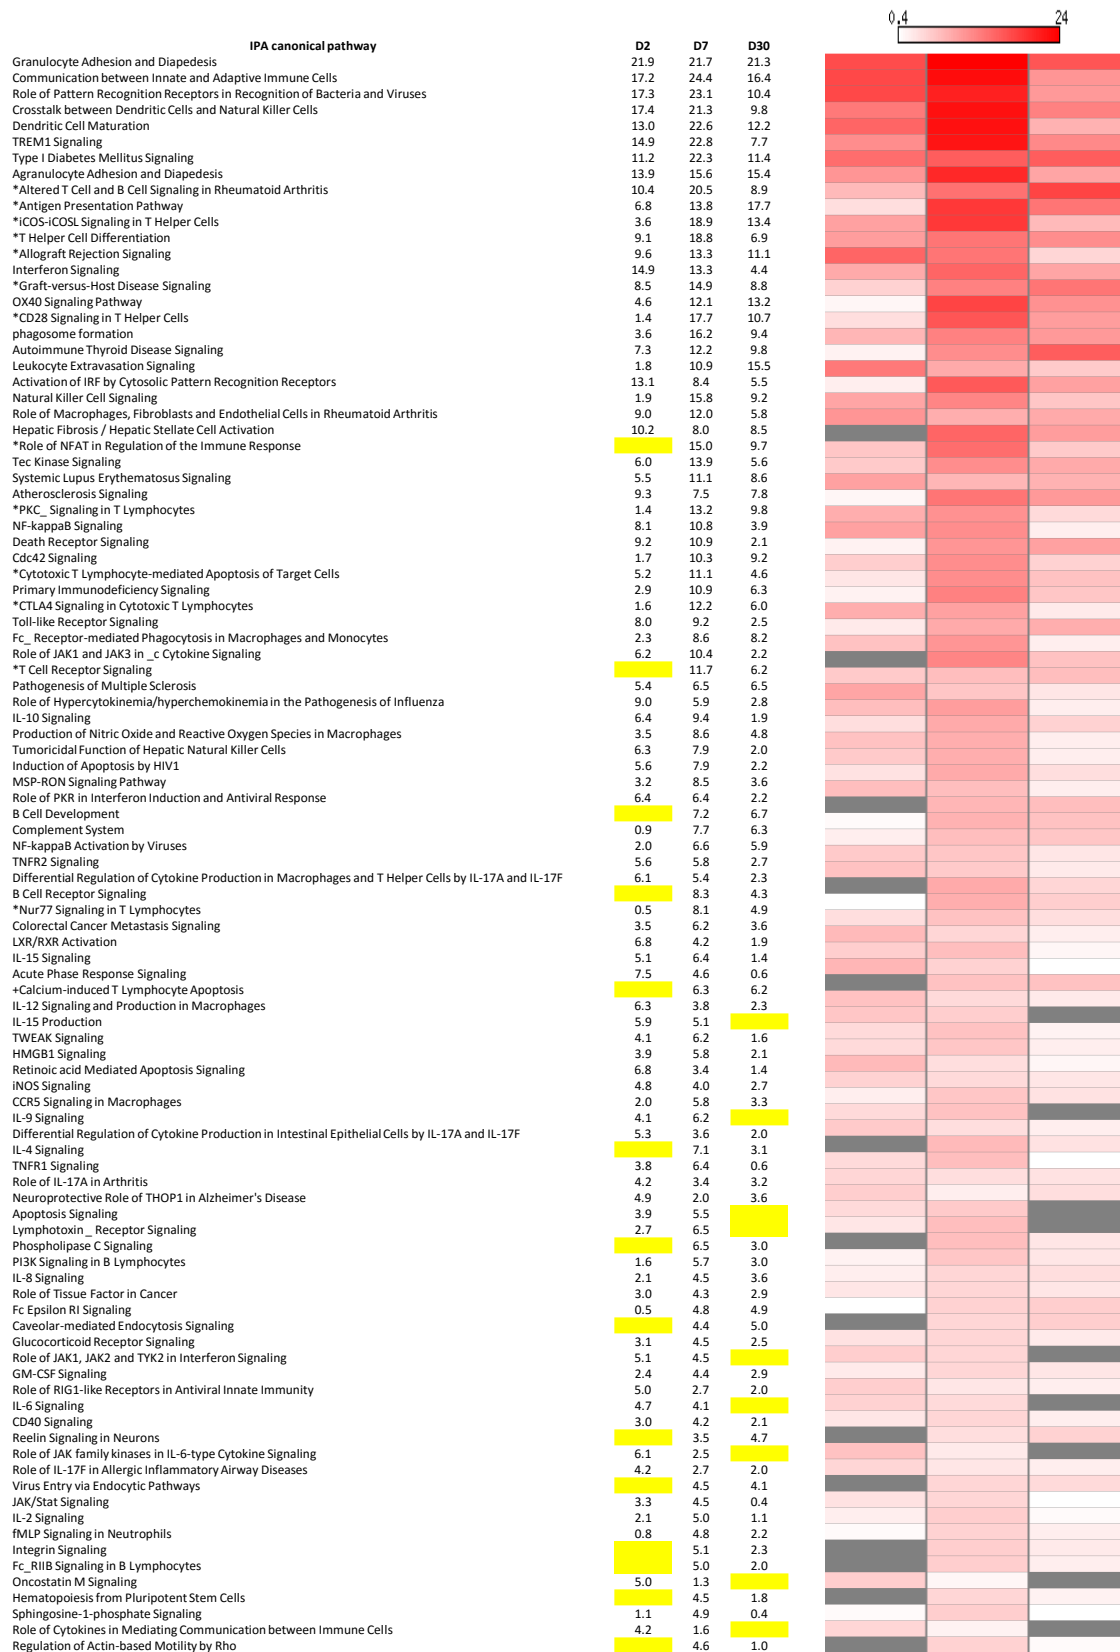

Supplement: S2 (10.1371/journal.ppat.1006155.s002) [file journal.ppat.1006155.s002]
