# Supplementary material for: RNA-Seq analysis of chikungunya virus infection and identification of granzyme A as a major promoter of arthritic inflammation
Source: PLoS Pathog. 2017 Feb 16;13(2):e1006155. doi: 10.1371/journal.ppat.1006155 (PMC5312928; doi:10.1371/journal.ppat.1006155)
Supplement: S3 Table — The gene lists for Fig 1A (the 247 shared genes), Fig 1B, 1D and 1F are provided. (XLSX) [file ppat.1006155.s012.xlsx]

## Sheet: Fig. 1A d2,7,30 feet shared
Gene	Day 2 fold change	Day 7 fold change	Day 30 fold change
Cxcl10	869.179	184.999	31.3958
Gm4841	686.93	322.924	10.8203
Cxcl9	391.473	322.43	62.0466
Mx1	339.913	29.8182	4.43772
Gm12185	269.19	183.705	13.1754
Iigp1	250.029	72.4197	15.3304
Isg15	226.838	44.6142	4.92291
Rsad2	221.115	15.4554	4.41799
Ifi44	215.484	44.806	10.5601
Ifit1	204.564	24.8434	7.778
Oasl1	152.148	37.1188	5.18887
Gm12250	130.905	129.014	13.8206
Ifit3	125.151	23.0953	5.81504
Irf7	116.167	38.8166	4.18669
Mx2	111.729	9.61582	2.31198
Irg1	88.5985	94.2578	42.9171
Gbp5	79.0421	44.4179	8.27816
Tgtp1	76.3523	88.0103	8.26268
Ifit2	75.6144	10.8468	2.70795
Apol9b	68.0668	19.064	7.61049
Gzmb	67.4749	623.446	18.2635
Ms4a4c	65.834	67.0288	5.05857
Pydc3	65.6489	28.115	3.97694
Igtp	64.2079	45.4825	6.40732
Gbp2	63.5082	53.5339	12.9967
Ccl5	62.8164	41.3083	9.3407
Usp18	62.0057	10.4428	3.22426
Batf2	61.8829	77.8735	12.6716
Apol9a	59.6314	19.0811	9.56
Cmpk2	58.188	7.6822	2.3157
Ccl4	56.6235	37.4125	4.59416
Saa3	55.1569	25.11	11.8617
Oasl2	54.0162	20.5941	5.5292
Fcgr4	51.3627	218.272	23.2518
Ly6c2	49.8441	45.5301	2.22987
Zbp1	49.7343	58.9643	11.7933
Gm4951	46.746	39.2459	7.09081
Gbp3	45.3459	29.2454	7.72803
Bst2	44.5283	13.797	3.6683
Cd274	42.5404	26.348	4.4079
Fam26f	41.1098	59.6256	5.52353
Slfn1	40.8833	47.5542	5.25128
Nos2	40.316	37.823	9.50021
Irgm1	39.3688	26.9331	3.94321
Irgm2	37.6553	23.1538	4.99678
Ccl2	36.7313	21.5876	3.28426
Gbp7	33.3296	16.5335	5.24768
Herc6	33.2016	10.5952	2.77525
Xaf1	31.3347	13.3177	3.01793
Ccl7	29.8254	23.4771	4.37717
Ccl12	29.3163	27.0994	9.81685
Oas2	29.2122	14.9794	3.43881
Gbp6	28.556	28.7973	2.56358
H2Q6	27.8671	17.636	7.69259
Plac8	26.9281	35.0033	2.14954
Pyhin1	26.8314	22.8398	4.3377
Dhx58	24.7959	12.1361	2.74767
Stat1	22.4897	18.5572	2.77932
Ifih1	21.3996	5.32736	2.19654
Klra2	21.1942	72.8082	9.09491
Slamf8	20.643	81.7933	8.92728
Parp14	20.5586	10.4368	2.72641
H2Q7	20.3044	17.636	7.45062
Tnfsf10	19.7693	8.34863	2.38209
Trim30a	19.5901	11.2742	3.90329
Lgals3bp	19.0942	9.36702	3.18766
Nlrc5	18.9322	12.7536	4.04545
Rtp4	18.8717	14.0772	3.9855
Fcgr1	18.7401	27.6313	6.97498
H2T24	18.4859	17.636	3.89453
Mlkl	18.2986	9.37027	2.58549
BC147527	18.2003	24.1788	4.02347
AW112010	18.1481	27.8667	5.94798
Cd69	18.0989	12.1319	4.57544
AA467197	17.7027	13.1515	6.6498
Parp9	17.311	6.97262	2.40943
Ddx60	17.0816	4.81762	2.75152
Cd300lf	17.0007	33.3032	3.67703
Ccl3	16.5546	10.0495	3.06428
Trim30d	16.1674	9.1004	3.17589
H2Q4	16.1066	17.636	4.67028
Ch25h	16.0797	12.7102	3.93712
Dtx3l	15.8141	7.46483	2.16742
Uba7	15.7803	8.95355	2.86209
Ifi204	15.6745	8.75975	3.78153
Sp110	15.5116	12.2298	3.4781
Ube2l6	15.0765	5.88006	2.40214
Slfn8	14.495	6.83599	3.25478
H2Q8	14.0732	17.636	4.35647
Slc15a3	13.8541	17.0187	3.22847
9330175E14Rik	13.1333	10.9938	6.01581
Slfn2	12.9929	13.1434	3.50028
Gm7030	12.9801	10.5049	13.2088
Tap1	12.9734	11.3911	3.15104
Psmb8	12.8557	14.9025	4.56378
Ifi203	12.5763	4.58999	3.1683
Ifi27l2a	12.4301	7.07284	2.33783
Psmb9	12.1337	14.7503	4.44148
Gbp8	11.5162	52.4507	7.99917
H2T10	11.4672	17.636	3.0037
Tlr9	11.1902	17.4794	3.26633
Psmb10	10.893	10.6725	2.72469
Slc28a2	10.7483	10.3695	4.76683
Samd9l	10.6299	3.52328	2.56454
Clec4e	10.507	14.1121	11.9625
Slamf7	10.3753	19.1193	5.6023
Samhd1	10.326	9.54847	3.46813
Sp100	10.3254	6.65708	2.64324
4933412E12Rik	10.2215	9.00858	3.59089
Cfb	10.1896	9.37131	3.7601
Sp140	10.1222	7.14146	3.48587
Mpeg1	9.85223	15.2217	6.27711
Irf1	9.83067	13.6449	2.90986
H2T23	9.77584	17.636	3.02105
Ms4a4b	9.52072	39.329	6.09138
Ccr5	9.24998	33.6093	14.8785
Trim14	8.78706	5.28953	2.21611
Rgs1	8.67925	11.1437	5.45788
Slfn5	8.61619	4.40161	2.07638
Ly6e	8.36595	5.66918	2.14352
H2K1	7.57597	17.636	3.98785
C2	7.36824	3.85885	2.17556
B2m	7.32465	8.73501	4.16045
Pira6	7.28996	17.929	5.14717
Cd180	7.24196	14.5552	4.16758
Ccr7	7.08285	10.8404	2.15421
Hck	6.81753	19.19	4.51198
Tlr2	6.77241	3.67053	3.08547
Tapbp	6.76064	4.80931	2.18877
Cd40	6.73963	7.41795	3.28866
Fpr2	6.73394	12.4236	2.84972
Epsti1	6.42974	7.33146	3.31477
Pik3ap1	6.30628	11.4456	3.22187
Tap2	6.29031	3.74177	2.30259
Klrk1	6.25322	19.1264	2.77872
AI607873	6.16901	4.34718	2.14579
H2M3	5.85711	17.636	4.38376
Trim12c	5.55994	3.42549	2.01708
Bcl2a1a	5.51423	14.355	4.01428
Mmp25	5.45848	10.4967	2.68589
Siglec1	5.43719	7.61192	2.84559
Ms4a6c	5.34337	13.5009	3.73511
Aif1	5.30642	21.9957	6.21433
Apobec3	5.14614	7.94942	2.07711
Slc2a6	5.07286	4.25722	4.09738
Aoah	5.06275	11.8045	4.0155
Ms4a6d	4.98523	10.2445	3.38837
H2D1	4.88236	17.636	3.96739
Icam1	4.86217	3.68032	2.18549
Hk3	4.80022	20.5059	4.25462
Traf1	4.75393	6.29196	3.1647
Bst1	4.71243	8.9075	5.25092
Stx11	4.70557	4.78016	2.03107
Ms4a6b	4.70104	10.3241	2.795
Slamf9	4.64636	9.58734	5.11413
Gsdmd	4.64024	4.87939	2.37091
Lrrc25	4.59871	11.8559	2.66649
Ms4a8a	4.59712	7.11084	2.63129
Cd72	4.54424	7.61693	2.95435
Lst1	4.49587	16.4485	2.31855
Bcl2a1d	4.4424	9.74249	3.11564
Lilrb4	4.42749	5.95863	3.86664
Nfkbie	4.36082	5.12922	2.16301
Sdc3	4.28338	5.64561	2.52468
Ccl8	3.90803	9.8525	2.58618
Vcam1	3.86358	3.8044	2.07357
Apobec1	3.72595	8.20663	3.3217
Tmem173	3.71791	6.23565	2.1461
Tmem106a	3.68044	4.42986	2.4778
Tlr13	3.61601	10.5634	4.44702
Fgr	3.61188	7.852	3.61118
Serpine1	3.54629	3.03032	2.27834
Lpxn	3.50803	6.23042	2.55586
Msr1	3.45549	10.7613	4.12396
Tnip3	3.44786	5.12887	7.00604
Timp1	3.43571	4.78865	2.41729
Nlrp3	3.40419	7.27199	3.05567
Irf8	3.33115	9.37345	2.97616
Gpr65	3.29067	15.812	4.28124
Bcl2a1b	3.27143	7.63258	3.53821
Tnfrsf14	3.2457	8.14063	2.98072
Cd52	3.15859	8.16538	2.7391
Lilrb3	3.10652	8.29119	3.31392
Glipr2	3.08523	5.29034	2.1854
Plaur	3.08273	2.91456	2.35628
Il21r	3.07447	10.0972	2.94844
Il10ra	3.05284	7.15861	3.39827
Clec4d	3.00616	4.50526	9.35832
Lcp2	2.99235	9.2666	2.82805
Gpr132	2.98037	8.19725	2.85185
Cd53	2.95748	5.82545	2.88438
Pstpip1	2.95431	5.89642	2.58322
Snx10	2.94968	3.97595	2.23665
Tifa	2.93587	3.42943	2.2131
Napsa	2.91535	4.23191	2.31429
Clec4a3	2.90643	9.49001	3.10308
Zc3h12d	2.89321	7.06799	2.40321
Basp1	2.85399	5.48769	2.08425
Cd300a	2.80866	6.63341	2.65336
Samsn1	2.79787	4.35095	2.22205
Adap2	2.79541	4.63436	2.05683
Irf5	2.79057	4.83612	2.01904
Srgn	2.7448	3.62553	2.2005
Abcg1	2.72187	5.39039	2.11319
Ctss	2.70958	8.79998	5.34337
Snx20	2.70101	7.01542	2.56422
Ly9	2.69443	10.6911	3.39234
Rnase6	2.62923	5.71316	3.6257
Tnfrsf1b	2.62031	5.16633	2.30713
AB124611	2.60332	10.4294	2.60682
Lck	2.57635	12.2683	3.17215
Neurl3	2.55568	4.79244	2.40384
Hcls1	2.54746	6.73622	2.59291
Clec4a1	2.53506	8.68502	3.23934
Zbtb32	2.52646	4.43806	2.33359
Plek	2.51828	4.62897	2.8913
Ccdc88b	2.50364	7.38993	2.22436
Pld4	2.4883	9.06037	4.65093
Fcer1g	2.4874	7.27471	2.66209
Sh2d1b1	2.48391	7.57145	3.80987
Vav1	2.42464	6.61408	2.92405
Pou2f2	2.41476	5.52525	2.19488
Ly86	2.39723	6.04189	3.67728
C3ar1	2.39511	7.14716	4.05952
Cd300ld	2.36318	7.85042	3.1566
Pilrb1	2.36153	4.6529	2.18278
AI504432	2.30767	4.9167	4.4313
Lyn	2.27783	5.67704	2.65382
Ptprc	2.26767	6.92167	3.14825
Myo1g	2.26346	4.90057	2.98
Naip2	2.26324	4.6215	2.57148
Lair1	2.2574	10.5845	7.93549
Rhoh	2.24414	6.44259	2.38846
Stap1	2.2284	3.99551	2.42955
AF251705	2.20803	11.5712	5.33841
Il2rb	2.15339	15.8117	2.23642
2210039B01Rik	2.14062	2.45879	2.02484
Cd200r1	2.1274	4.41052	2.51061
Itgal	2.12476	8.43799	2.56109
Cxcl16	2.11916	4.97305	2.97117
Selplg	2.09223	4.5173	3.10493
Clec12a	2.06601	11.4351	6.9866
Cybb	2.04436	5.51874	4.38553
Prr5l	2.04273	3.14788	2.26169
Tagap	2.0355	3.42822	2.12985
Sfpi1	2.01263	4.8514	2.45973
Clec7a	2.00687	5.56071	3.41021

## Sheet: Fig. 1B heat map data
IPA Upstream regulators (USR); up-regulated genes in feet at the indicated times post infection
	Day 2	Day 7	Day 30
IFNG	13.0757	13.2717	10.2917
TNF	13.0775	12.6322	8.381
Interferon alpha	9.29695	9.38568	7.24727
IL1B	10.5002	9.0764	6.25772
NFkB (complex)	9.72225	8.99573	6.69689
IRF7	8.97671	8.84573	7.237
STAT1	8.5187	8.3526	6.24191
IFNA2	8.02857	7.92426	5.9052
Ifnar	7.42177	7.682	6.54996
TLR4	7.93082	7.55851	5.92765
TICAM1	7.97013	7.34335	5.72945
MYD88	7.61581	7.12175	6.11265
TLR3	7.46259	7.1323	5.8445
IFNB1	7.42686	7.66737	5.31397
CSF2	7.16084	7.73707	5.22975
APP	7.42374	6.46772	5.78562
IRF3	6.83719	6.76348	6.04293
TGM2	6.51996	7.11365	5.79662
IL2	6.44309	7.74475	4.78353
OSM	7.03944	6.38438	5.35664
IRF1	6.67446	6.82356	5.1097
TLR9	6.72113	6.52282	5.36055
IKBKB	6.71276	6.33985	5.44188
SMARCA4	6.20912	6.94021	5.12701
IL6	7.08533	6.25982	4.69485
PRL	5.92424	6.50156	5.34621
RELA	6.89415	6.06391	4.77729
CHUK	6.57351	6.21583	4.81241
SAMSN1	6.7082	6.245	4.58258
Ifn	6.30807	6.06359	5.1567
CD40LG	6.60606	6.28395	4.57054
IL1	6.5232	6.00071	4.91684
IL5	6.02418	6.73218	4.43297
IFN alpha/beta	6.03739	6.11947	4.8984
P38 MAPK	6.2955	6.13097	4.56751
IL15	5.46627	6.45324	4.92043
IFNL1	6.22247	5.98149	4.63588
STAT3	5.91131	5.89395	4.7973
IFN Beta	6.16098	5.80118	4.56161
TNFSF11	5.8292	5.5794	4.95507
NFATC2	6.09772	5.79858	4.46076
SASH1	6.16441	5.83095	4.12311
STAT4	5.70053	6.04965	4.29248
IL1A	6.39491	5.59912	3.92466
DOCK8	6	5.65685	4.24264
IL18	5.57316	5.84686	4.24817
IL17A	5.97603	4.72774	4.81282
IRF5	5.82059	5.37748	4.11932
IL12 (complex)	5.61198	6.46739	2.67842
CSF1	4.48235	4.73699	5.3429
DDX58	5.30198	5.14262	3.77306
F2	5.46232	5.10281	3.57625
Tlr	5.47539	4.9333	3.62738
Ifn gamma	5.19557	4.99575	3.80331
IFNAR1	4.90362	4.60998	4.35815
IL27	4.38989	4.96829	4.45623
SPI1	3.59759	4.83179	5.36561
Jnk	4.83236	4.99801	3.90719
TLR7	5.17286	5.07736	3.26364
TLR2	5.28878	4.79675	3.42648
LEP	4.55658	4.59406	4.33915
EIF2AK2	4.88656	5.16088	3.37288
IFNA1/IFNA13	4.86344	4.66347	3.88877
PARP1	4.71844	4.51346	4.17519
NFKB1	4.95615	4.8537	3.58018
CEBPB	5.49851	4.2906	3.43233
MAVS	4.85093	4.82727	3.49322
CD44	4.22118	4.6389	4.22075
TNFSF12	4.79504	4.23983	3.97899
TCR	5.19619	4.86392	2.92326
RIPK2	4.78904	4.49115	3.52663
IKBKG	4.85895	4.58207	3.22689
PI3K (complex)	4.4597	4.48452	3.71235
NOD2	4.74932	4.61833	3.2544
Map3k7	4.45276	4.06744	3.79835
NFKBIA	4.25886	4.78468	3.2721
Tnf (family)	4.60238	4.22683	3.25801
IFN type 1	4.20383	4.20383	3.63715
PAF1	4.47214	4.3589	3.16228
JAK2	4.3607	4.17027	3.41231
ARHGAP21	4.69042	4.24264	3
IL3	4.09138	5.00579	2.78388
ETS1	2.62871	4.64788	4.51169
JAK1	4.22627	4.01277	3.53514
Hbb-b2	3.4641	4.24264	3.74166
CD14	4.3626	4.12707	2.9521
IL13	4.1238	4.15671	2.74789
ITK	3.28692	4.84912	2.80728
BAX	3.94211	4.33777	2.56273
TMEM173	4.26582	3.72857	2.82843
TRAF6	4.06497	3.58558	2.94956
TNK1	3.59211	3.85039	3.13786
FADD	3.85664	3.45232	3.16849
TRADD	4.07128	3.56845	2.82843
PARP9	3.29252	3.71868	3.44036
IL7	3.18848	4.44838	2.80952
TRPV4	3.83482	3.42997	3.12995
IL12 (family)	3.6445	4.45964	2.20728
TYROBP	3.41982	4.07488	2.78861
IL12B	3.80001	3.80001	2.64934
IFNA4	3.74487	3.35146	3.06882
C5	3.67296	3.76056	2.71812
FZD9	3.42929	3.42929	3.2827
TBK1	4.26721	3.27486	2.43591
STAT2	3.88709	3.55823	2.38623
TLR5	3.7714	3.5271	2.40098
IRF8	3.4556	3.16741	2.93354
NOS2	3.42179	3.36429	2.70975
EBI3	2.93659	3.32265	3.07665
CD40	3.28369	3.55411	2.4815
TNFSF10	2.978	4.05939	2.25458
MOG	3.09888	3.25624	2.76326
TNFRSF1A	3.89517	2.71558	2.2977
LDL	3.104	2.65289	2.89315
VIPR1	2.89031	2.71822	2.96972
IL17RA	3.05273	3.29484	2.2
ERK1/2	3.64081	2.98518	1.7802
KRT17	3.15296	2.67261	2.52982
IL6R	3.64244	2.72637	1.97452
Hbb-b1	2.28968	3.2315	2.62998
IL12A	3.06666	3.20103	1.70536
Fibrinogen	2.87706	2.87706	1.91005
IL21	2.92235	3.23745	1.34162
BCR (complex)	1.76471	2.93371	2.7699
MAPK9	3.14399	2.72069	1.48025
TGFB1	2.3318	3.029	1.90314
IL4	2.62812	3.5341	0.752587
TNFRSF1B	3.20965	1.87899	1.70677
CREBBP	2.55107	2.04249	1.75506
CSF3	2.00261	2.32093	1.9743
IRAK4	2.42184	1.98287	1.3017
TP53	3.39713	2.50475	-0.256857
Ige	1.83648	1.79791	1.54807
CCR2	1.70034	2.53262	0.913249
IKBKE	2.33324	1.25489	1.46819
TIRAP	2.1219	1.80073	0.997234
CAMP	1.1365	1.94121	1.68009
TREM1	1.86726	1.6818	0.494357
MSR1	1.20712	1.93843	0.738549
Immunoglobulin	1.09126	1.30326	0.449114
IgG	0.293696	0.0869192	1.86097
FAS	0.0885067	0.818836	0.498083
IRF9	0.664863	0.0469841	0.585471
STAT5A	1.31163	0.753371	-0.816497
ID3	0.418121	-0.0657241	0.0443242
IRF2	-0.675412	0.345937	0.288576
MAP3K7	0.00887339	-0.44808	0.339401
ID2	-0.512989	0.338062	-0.242536
IL10	-0.660514	0.273252	-0.867038
KRAS	0.141842	-0.103584	-1.52128
S100A8	-0.810421	-0.211139	-1.34804
SATB1	-0.945389	-1.05838	-0.51044
STAT6	-0.753435	-0.929962	-0.85281
PROC	-1.75227	-1.69687	-1.57762
CNOT7	-1.98248	-1.98248	-1.06749
HMOX1	-1.89581	-1.72006	-2.18194
CD28	-2.35391	-2.74492	-1.64423
KLF2	-2.8641	-2.28995	-2.30514
BCL6	-3.2163	-2.98487	-1.70282
VIP	-2.77751	-2.23107	-3.14745
TAB1	-3.45619	-3.31976	-2.70426
DNASE2	-3.39476	-3.1045	-3.11211
DUSP1	-3.49186	-3.72521	-2.59544
USP18	-3.68295	-3.68295	-2.77241
NR3C1	-4.05118	-2.95049	-3.15268
SOCS3	-3.76615	-3.65775	-3.18339
IRF4	-3.60152	-3.92212	-3.49224
APOE	-3.949	-3.85667	-3.82476
Irgm1	-4.31524	-4.19832	-3.87298
Nr1h	-4.31477	-4.97214	-3.58677
Alpha catenin	-5.32501	-5.42019	-3.56339
MAPK1	-4.99141	-4.93822	-4.39843
mir-21	-4.82254	-6.10275	-3.93415
ACKR2	-5.2915	-5.2915	-4.58258
NKX2-3	-5.28185	-5.84206	-4.2962
IL1RN	-6.1612	-5.6697	-4.45658
PTGER4	-6.21058	-5.48214	-5.18902
CD3	-6.63289	-6.65986	-4.46849
SOCS1	-6.24222	-6.30873	-5.3334
TRIM24	-7.35808	-7.15193	-6.26522
IL10RA	-7.30798	-7.97714	-6.3712

## Sheet: Feet USR day 2 (Fig 1B)
IPA Upstream regulators (USR); up-regulated genes in feet day 2
Upstream Regulator	Fold Change	Molecule Type	Predicted Activation State	Activation z-score	Notes	p-value of overlap	log P value	Mechanistic Network	Target molecules in dataset
TNF	2.099	cytokine	Activated	13.0775	bias	3.09E-88	-87.51	350 (13)	ADAM8,ADAMTS4,ADM,ADORA2A,AMPD3,ANGPT1,ANGPT2,ANGPTL4,APAF1,APLN,APOBEC3B,ARF4,ARSI,ATF3,B2M,BCL2A1,BCL3,BDKRB1,BIRC3,CASP1,Casp12,CASP4,CASP7,CCL11,CCL19,CCL2,Ccl2,CCL20,CCL3L3,CCL4,CCL5,Ccl7,CCR5,CCR7,CCRN4L,CD274,CD40,CD40LG,CD47,CD69,CD86,CDH5,CFB,CH25H,CHI3L1,CLEC4E,CLIC4,CSF2RB,CST7,CTSS,CTSZ,CXCL10,CXCL11,CXCL13,CXCL16,CXCL2,Cxcl3,CXCL3,CXCL6,Cxcl9,CYBB,CYP7B1,DAXX,DUSP2,EHF,EIF2AK2,ENG,FA…
IFNG		cytokine	Activated	13.0757	bias	1.70E-116	-115.77	369 (16)	ADM,ADORA2A,AGRN,AIF1,ANGPTL4,Art2a-ps,ATF3,B2M,BAK1,BATF2,BCL2A1,BCL3,BST1,Bst2,C4A/C4B,CASP1,Casp12,CASP4,CASP7,CCL11,CCL19,CCL2,Ccl2,CCL20,CCL3L3,CCL4,CCL5,Ccl7,Ccl8,CCR5,CCRL2,CD274,CD40,CD40LG,CD72,CD86,CFB,CH25H,CHAC1,CLEC4E,CLIC4,CMPK2,CSF2RB,CTSS,CTSZ,CXCL10,CXCL11,CXCL16,CXCL2,CXCL3,CXCL6,Cxcl9,CYBB,DOK1,DTX3L,DUOX2,DUOXA2,EHF,EIF2AK2,ERAP1,FAM26F,FAS,FCER1G,FCGR1A,FCGR3A/FCGR3B,FPR2,GBP…
IL1B	1.285	cytokine	Activated	10.5002	bias	2.44E-76	-75.6126	358 (14)	ADAM8,ADAMTS4,ADM,AIF1,AMPD3,ANGPT1,ANGPTL4,ATF3,BCL2A1,BCL3,BDKRB1,BIRC3,CASP4,CCL11,CCL2,Ccl2,CCL20,CCL4,CCL5,Ccl7,CCR5,CCR7,CCRL2,CCRN4L,CD274,CD40,CD40LG,CD69,CD86,CFB,CHI3L1,CMPK2,CSF2RB,CSRNP1,CTSS,CTSZ,CXCL10,CXCL11,CXCL2,CXCL3,CXCL6,Cxcl9,CYBB,DLL4,EHF,FAS,FPR2,GBP1,GBP2,GBP6,GCH1,GDF15,GEM,GLA,GRN,HELZ2,HLA-A,HLA-E,HP,HSD11B1,ICAM1,IDO1,IFI16,Ifi47,IFIT1,IFIT1B,IFIT3,IL10,IL10RA,IL15,IL1…
NFkB (complex)		complex	Activated	9.72225	bias	1.50E-62	-61.8239	308 (12)	ABCG1,ADAMTS9,ALDH1B1,ANKRD1,ATF3,BAK1,BATF,BCL2A1,BCL3,BIRC3,CASP4,CASP7,CAV3,CCL11,CCL2,Ccl2,CCL20,CCL3L3,CCL4,CCL5,Ccl7,CCR7,CD274,CD40,CD40LG,CD69,CD86,CFB,CLEC4E,CST7,CXCL10,CXCL11,CXCL2,CXCL3,CXCL6,Cxcl9,CYBB,DAXX,DUSP2,EHF,ERAP1,FAM46A,FAS,FCGR1A,FOXF1,FPR2,GBP2,GCH1,GDF15,GLA,HLA-A,HLA-F,ICAM1,IDO1,IFNA14,IFNA4,IFNB1,IL10,IL10RA,IL15,IL15RA,IL1B,IL1RN,IL2RA,IL6,INSRR,IRF1,IRF7,ISG15,ITGAL…
Interferon alpha		group	Activated	9.29695	bias	9.50E-79	-78.0223	357 (17)	ADAR,APOBEC3B,APOL2,B2M,BAK1,BCL2A1,BCL3,Bst2,C3AR1,CASP1,CCL19,CCL2,CCL5,CCR5,CCR7,CD40,CD69,CD86,CH25H,CSF2RB,CXCL10,CXCL11,CXCL2,CXCL3,Cxcl9,DAXX,DHX58,EIF2AK2,FAS,FCGR1A,GBP1,GBP2,HLA-A,HLA-G,ICAM1,IDO1,IFI16,IFI35,IFIH1,IFIT1,IFIT1B,IFIT2,IFIT3,IFITM3,IFNB1,IL10,IL10RA,IL12RB1,IL15,IL15RA,IL1B,IL1RN,IL21R,IL2RA,IL6,IRF1,IRF5,IRF7,IRF8,IRF9,ISG15,ISG20,LILRB4,MEFV,MMP3,MX1,Mx1/Mx2,MYD88,NMI,N…
IRF7	6.860	transcription regulator	Activated	8.97671	bias	3.20E-86	-85.4949	317 (16)	ADAR,BC147527,CASP4,CCL19,CCL5,CCRL2,CD40,CD69,CMPK2,CXCL10,DAXX,DHX58,FAM26F,FCGR1A,GBP1,GBP5,HELZ2,IDO1,IFI16,IFI35,IFI44,Ifi47,IFIH1,IFIT1,IFIT1B,IFIT2,IFIT3,IFITM3,IFNA14,IFNA4,IFNB1,Igtp,IL15,IL15RA,IRF1,IRF7,IRF8,IRF9,IRGM,Irgm1,ISG15,ISG20,JAK2,MAP3K8,Ms4a4b (includes others),MX1,Mx1/Mx2,NAMPT,NMI,NT5C3A,OAS1,OAS2,OASL,Oasl2,PARP12,PARP14,PHF11,PLAC8,PLSCR1,PSMB10,PSMB8,PSMB9,PSME1,PSME2,R…
STAT1	4.491	transcription regulator	Activated	8.5187	bias	3.30E-86	-85.4815	347 (16)	ANGPT2,APOBEC3B,B2M,BATF2,CASP1,CASP4,CCL19,CCL2,Ccl2,CCL3L3,CCL4,CCL5,Ccl8,CCR7,CCRL2,CD274,CD40,CD86,CFB,CH25H,CMPK2,CSF3R,CXCL10,CXCL11,CXCL3,Cxcl9,DUOX2,EIF2AK2,FAM26F,FAS,FCER1G,FCGR1A,GBP1,GBP2,GBP5,GBP6,HERC6,ICAM1,IDO1,IFI16,IFI35,Ifi47,IFIT1,IFIT1B,IFIT2,IFIT3,IFITM3,IFNB1,Igtp,IL10,IL15,IL15RA,IL18BP,IL1B,IL6,IRF1,IRF5,IRF7,IRF8,IRF9,IRG1,Irgm1,ISG15,JAK2,Klrk1,LCN2,LY6E,MX1,Mx1/Mx2,NEU…
IFNA2		cytokine	Activated	8.02857	bias	2.35E-64	-63.6289	332 (18)	B2M,C19orf66,CCL2,CD86,CMPK2,CORO2A,CXCL10,CXCL11,EIF2AK2,FAS,GBP1,GBP2,GEM,HERC6,HLA-A,HLA-E,HSH2D,IFI16,IFI35,IFI44,IFIH1,IFIT1,IFIT2,IFIT3,IFITM3,IFNB1,IL10,IL1B,IL2RA,IL2RB,IL6,IRF1,IRF5,IRF7,IRF9,ISG15,ISG20,LGALS3BP,LILRB4,LY6E,LYN,MX1,Mx1/Mx2,OAS1,OAS2,OGFR,PARP12,PARP9,PHF11,PLSCR1,PML,PSME1,PTAFR,PTTG1,RSAD2,SAMHD1,SAMSN1,SERPINB9,SLC15A3,SOCS1,SOCS3,SP110,STAT1,STAT4,TAP1,TDRD7,THEMIS2,…
TICAM1		other	Activated	7.97013	bias	5.18E-67	-66.2857	295 (17)	APOBEC3B,BCL3,CASP4,CCL2,Ccl2,CCL3L3,CCL4,CCL5,CCRL2,CD40,CD86,CFB,CH25H,CMPK2,CXCL10,CXCL11,CXCL13,CXCL2,CXCL3,CXCL6,FAS,FPR1,FPR2,GDF15,ICAM1,IFI16,Ifi47,IFIT1,IFIT1B,IFIT2,IFIT3,IFNA4,IFNB1,Igtp,IL10,IL15,IL15RA,IL18BP,IL1B,IL6,IRF1,IRF7,IRG1,IRGM,Irgm1,ISG15,ISG20,MEFV,Ms4a4b (includes others),Mx1/Mx2,NFKB2,NFKBIZ,OASL,PDE4B,RELB,RIPK2,RSAD2,SAMHD1,SELE,SERPINE1,SOCS1,SOCS3,TLR2,TLR3,TNF,TNFA…
TLR4		transmembrane receptor	Activated	7.93082	bias	1.89E-77	-76.7235	354 (20)	ADM,APOBEC3B,ARID5A,ATF3,BATF,CASP7,CCL2,Ccl2,CCL3L3,CCL4,CCL5,Ccl7,Ccl8,CCR5,CD200R1,CD274,CD40,CD86,CFB,CMPK2,CXCL10,CXCL2,CXCL3,CXCL6,Cxcl9,DAXX,DLL4,DUOX2,DUSP2,FAS,GBP2,HDC,HELZ2,HPSE,ICAM1,IFI16,Ifi47,IFIT1B,IFIT2,IFIT3,IFITM3,IFNA14,IFNA4,IFNB1,Igtp,Iigp1,IL10,IL15,IL15RA,IL18BP,IL1B,IL2RA,IL2RB,IL6,IRF1,IRF2,IRF7,IRF8,IRGM,Irgm1,ISG15,ISG20,LCN2,LILRB4,MX1,Mx1/Mx2,MYD88,NFKB2,NFKBID,NFKBI…
MYD88	1.892	other	Activated	7.61581	bias	5.71E-51	-50.2434	288 (14)	ALDH1A2,APOBEC3B,BATF,BCL3,CASP4,CCL2,Ccl2,CCL3L3,CCL4,CCL5,CCRL2,CD200R1,CD274,CD40,CD86,CH25H,CLIC4,CMPK2,CXCL10,CXCL13,CXCL2,CXCL3,CXCL6,Cxcl9,DAXX,DLL4,FBXO32,FPR1,FPR2,GDF15,HDC,HLA-A,HP,ICAM1,IFIT1B,IFIT2,IFNA14,IFNA4,IFNB1,IL10,IL15,IL1B,IL6,IRF1,IRF7,IRG1,ISG15,MEFV,Ms4a4b (includes others),MSR1,NFKB2,NFKBIZ,NOD2,NOS2,NOS3,OASL,PDE4B,RELB,RSAD2,SAA1,SAMHD1,SELE,SERPINE1,SOCS1,SOCS3,TIMP1,…
TLR3	3.652	transmembrane receptor	Activated	7.46259	bias	2.11E-65	-64.6757	334 (18)	ADAMTS4,ATF3,BAK1,CCL2,Ccl2,CCL20,CCL3L3,CCL4,CCL5,Ccl7,CD274,CD300E,CD40,CD69,CD86,CFB,CLCA1,CMPK2,CXCL10,CXCL11,CXCL2,CXCL3,Cxcl9,DHX58,EIF2AK2,FAS,GBP2,GCH1,ICAM1,IFI16,IFI44,Ifi47,IFIH1,IFIT1,IFIT2,IFIT3,IFNA14,IFNA4,IFNB1,Iigp1,IL10,IL15,IL1B,IL1RN,IL6,IRF7,IRG1,ISG15,ISG20,Klrk1,LCN2,LILRB4,LIPG,MAP3K8,MX1,Mx1/Mx2,MYD88,N4BP1,NFKBIZ,NMI,NOS2,NTS,OAS1,OASL,Oasl2,PFKFB3,PTX3,RGS1,RSAD2,SELE,S…
IFNB1	21.000	cytokine	Activated	7.42686	bias	4.62E-74	-73.3354	343 (17)	APOBEC1,Art2a-ps,BAK1,Bst2,CASP1,CCL2,Ccl2,CCL4,CCL5,CCR5,CCRN4L,CD274,CD40,CD86,CH25H,CLEC4E,CMPK2,CXCL10,CXCL11,CXCL2,DAXX,DHX58,EIF2AK2,GBP2,GBP5,GBP6,GBP7,Gbp8,GNB4,HLA-A,Hmga2,IDO1,IFI16,Ifi27l2a/Ifi27l2b,Ifi47,IFIH1,IFIT1,IFIT1B,IFIT2,IFIT3,IFNB1,Igtp,IL10,IL1B,IL6,IRF1,IRF7,IRF9,IRG1,IRGM,Irgm1,ISG15,ISG20,MLANA,MX1,Mx1/Mx2,MYD88,NFKBIE,NMI,NOD1,NOD2,NOS2,NT5C3A,OAS1,Oas1b,Oas1d (includes …
APP		other	Activated	7.42374	bias	6.06E-31	-30.2175	339 (19)	ABCG1,ADAMTS4,AIF1,ARF4,C4A/C4B,Casp12,CCL2,Ccl2,CCL20,CCL3L3,CCL4,CCL5,Ccl7,CCR5,CD40,CD69,CD86,CDH5,CH25H,CMPK2,CRYM,CSF2RB,CXCL10,CXCL2,CXCL3,Cxcl9,CYBB,DAXX,ECE2,ENG,FCGR1A,GBP2,GBP6,GDF15,HAP1,HERC6,HLA-E,ICAM1,ICAM2,IDO1,IFI16,IFI35,Ifi47,IFIH1,IFIT1B,IFIT2,IGF2BP2,Igtp,IL10,IL1B,IL6,IRF1,IRF5,IRF7,IRGM,Irgm1,ISG20,ITGAL,JUNB,KCNC4,LBP,Ly6a (includes others),MMP13,MMP3,MSR1,Mx1/Mx2,NAMPT,NO…
Ifnar		group	Activated	7.42177	bias	5.17E-74	-73.2865	350 (16)	APOBEC3B,B2M,Bst2,CCL2,Ccl2,CCL5,CD274,CD40,CD86,CXCL10,Cxcl9,EIF2AK2,FCER1G,GBP2,H2-Q8,HLA-A,HLA-E,HLA-G,IDO1,IFI16,IFI35,IFIH1,IFIT1B,IFIT2,IFIT3,IFITM3,IFNB1,IL15,IL1B,IL6,IRF1,IRF7,IRF8,IRF9,Irgm1,ISG20,Mx1/Mx2,MYD88,OAS1,OAS2,OASL,PNPT1,PSMB8,PSMB9,RSAD2,Sp100,STAT1,STAT2,TAP1,TAP2,TAPBP,TLR2,TLR3,TNF,TNFSF10,TRIM21,UBE2L6,USP18,VCAM1,XAF1,ZBP1
CSF2		cytokine	Activated	7.16084	bias	2.42E-38	-37.6162	369 (18)	ABCG1,ADAM8,APAF1,BCL2A1,BCL3,BIRC3,C4A/C4B,CASP1,CCL2,Ccl2,CCL3L3,CCL4,Ccl8,CCR5,CCR7,CD180,CD40,CD40LG,CD69,CD86,CLEC7A,CSF2RB,CXCL10,CXCL2,Cxcl9,CYBB,FANCA,FAS,FCGR1A,FPR2,GCH1,GDF15,HDC,HOXB4,ICAM1,IDO1,IFITM3,IL10,IL15,IL1B,IL1RL1,IL1RN,IL2RA,IL3RA,IL6,IRF2,IRF5,JAK2,Krtap21-1,LY9,NFKB2,NLRP3,NOS2,OSM,OSMR,PDE4B,PTK2B,RELB,RHOH,RIPK2,SERPINB9,SLAMF7,Slfn2,SOCS1,SOCS3,TGM2,THBS1,TIFA,TLR1,TLR…
IL6	4.510	cytokine	Activated	7.08533	bias	2.96E-41	-40.5287	383 (14)	ADAMTS4,ATF3,BAK1,BATF,BCL3,CASP1,CASP7,CCL11,CCL2,Ccl2,CCL20,CCL3L3,CCL4,CCL5,CCR5,CCR7,CD40,CD53,CD86,CLEC4E,CSF2RB,CSF3R,CXCL10,CXCL13,CXCL2,CXCL3,CXCL6,Cxcl9,CYBB,FAS,FCGR1A,FPR2,GBP2,H2-Q8,HLA-A,HP,HPX,ICAM1,IDO1,IFI16,IFIT1,IFIT1B,IFIT2,IFITM3,IFNB1,IL10,IL15,IL1RL1,IL1RN,IL6,IRF1,IRF9,JAK2,JUNB,KDR,LAG3,LBP,LCN2,LRG1,LY86,MMP13,MMP3,MSR1,MYD88,NAMPT,NGF,NOS2,NOS3,PRF1,PSMB10,PSMB8,PSMB9,PS…
OSM	2.322	cytokine	Activated	7.03944	bias	1.77E-32	-31.752	314 (17)	ABCG1,ADAMTS4,AMPD3,ANGPT2,B2M,BAK1,CASP4,CCL11,CCL2,Ccl2,CCL20,CCL5,CH25H,CXCL10,CXCL13,CXCL2,CXCL3,GBP1,GBP2,GCA,HLA-A,HLA-F,HP,HSD11B1,ICAM1,IFI35,IL10,IL13RA1,IL15,IL15RA,IL1B,IL6,IRF1,IRF7,IRF9,ISG20,ITGAL,JUNB,KRT34,LBP,LCN2,LITAF,MMP13,MMP3,MX1,MYD88,NAMPT,NOS2,OAS1,OSM,OSMR,PDPN,PFKFB3,PSMB8,PSMB9,SAA1,SELE,SELP,SERPINA3,SERPINE1,SLC7A8,SOCS1,SOCS3,STAT1,STAT3,STX11,TAP1,TAP2,TAPBP,TIMP1,…
RELA		transcription regulator	Activated	6.89415	bias	3.26E-41	-40.4868	363 (15)	ANKRD1,B2M,BCL2A1,BCL3,BIRC3,CCL11,CCL19,CCL2,Ccl2,CCL20,CCL5,CCR7,CD40,CD69,CFB,CHI3L1,CXCL10,CXCL11,CXCL2,CXCL3,CXCL6,CYBB,EHF,ERAP1,FAS,GBP1,GCH1,GDF15,ICAM1,IFIT1B,IFNB1,IL10,IL15RA,IL1B,IL1RN,IL2RA,IL6,IRF1,IRF7,ISG15,JUNB,LYN,Mx1/Mx2,NAMPT,NFKB2,NFKBID,NFKBIE,NMI,NOD2,NOS2,OAS2,Pmaip1,PSMB10,PSMB9,PTX3,RELB,SAA1,SELE,SELP,Serpina3g (includes others),TAC1,TACR1,TAP1,TAP2,TAPBP,TFPI2,TGM2,Tlr…
IRF3		transcription regulator	Activated	6.83719	bias	9.34E-72	-71.0297	274 (14)	APOBEC3B,B2M,BC147527,BIRC3,CCL19,CCL2,Ccl2,CCL3L3,CCL4,CCL5,CCRL2,CD69,CD86,CLIC4,CMPK2,CXCL10,Cxcl9,DAXX,DHX58,FAM26F,FCGR1A,GBP1,GBP5,HELZ2,HLA-F,IFI16,IFI44,Ifi47,IFIH1,IFIT1,IFIT1B,IFIT2,IFIT3,IFITM3,IFNA14,IFNA4,IFNB1,Igtp,IL10,IL15,IL1B,IL6,IRF5,IRF7,IRGM,Irgm1,ISG15,ISG20,JUNB,MMP3,Ms4a4b (includes others),Mx1/Mx2,NOS2,NT5C3A,OAS1,OAS2,OASL,Oasl2,PARP12,PARP14,PHF11,PLAC8,Pmaip1,PNP,RSAD2…
TLR9	3.484	transmembrane receptor	Activated	6.72113	bias	1.55E-37	-36.8097	295 (18)	ADAMTS4,ATF3,Ccl2,CCL3L3,CCL4,CCL5,Ccl7,CCR7,CD274,CD300A,CD300E,CD40,CD69,CD86,CXCL10,CXCL3,FAS,GCH1,IDO1,IFI16,IFIT1B,IFIT2,IFIT3,IFNA14,IFNA4,IFNB1,IL10,IL1B,IL6,IRF7,IRG1,ISG15,LAIR1,LCN2,LILRB4,LIPG,Mx1/Mx2,NFKBIZ,NOS2,NTS,Oasl2,PFKFB3,RSAD2,SERPINE1,SOCS1,SOCS3,STAT2,TIMP1,TNF,TNFRSF1B,TNFSF10,USP18
IKBKB		kinase	Activated	6.71276	bias	1.55E-40	-39.8097	315 (14)	AMPD3,ANKRD1,ATF3,BIRC3,CCL11,CCL19,CCL2,Ccl2,CCL20,CCL3L3,CCL4,CCL5,CCR7,CCRN4L,CH25H,CTSZ,CXCL10,CXCL2,CXCL3,CXCL6,Cxcl9,CYP7B1,FAS,GBP2,GCH1,GRN,HLA-A,ICAM1,IFI16,IFIT1B,IFNA4,IFNB1,IL10,IL1B,IL1RN,IL6,IRF1,IRG1,ISG15,JUNB,LCN2,MMP13,MMP3,MX1,NFKB2,NGF,NOS2,NOS3,PTK2B,PTX3,RELB,RGS16,SELE,Slfn2,SOCS1,SOCS3,STAT3,TNF,TNFAIP2,TNFRSF1B,TNFRSF9,TRIM63,VCAM1,VCAN
SAMSN1	1.484	other	Activated	6.7082	bias	1.11E-43	-42.9547	297 (14)	ARID5A,BATF,CCL3L3,CCL4,Ccl7,CD40,CMPK2,CXCL10,CXCL2,Cxcl9,DAXX,HDC,HELZ2,IFIT1B,IFIT2,IFIT3,IFNB1,Iigp1,IL15,IL15RA,IL6,IRF1,IRF2,IRF7,IRGM,ISG15,ISG20,Mx1/Mx2,NFKBIZ,NMI,OASL,PML,RSAD2,SOCS1,SOCS3,STAT1,STAT2,TIMELESS,TLR3,TNF,TNFSF8,Trim12a,TRIM21,USP25,Vnn3
IRF1	3.297	transcription regulator	Activated	6.67446	bias	1.44E-61	-60.8416	347 (16)	ADAM8,B2M,BAK1,CASP1,CASP7,CCL19,CCL2,CCL5,CD274,CD40,CFB,CTSS,CXCL10,CXCL11,CXCL16,CYBB,EIF2AK2,ERAP1,FPR2,GBP2,HLA-G,IDO1,IFI35,IFIH1,IFIT1,IFIT2,IFIT3,IFITM3,IFNA4,IFNB1,IL10,IL12RB1,IL15,IL18BP,IL1B,IL6,IRF1,IRF2,IRF5,IRF7,IRF9,ISG15,JAK2,MX1,NOS2,OAS1,OAS2,PML,PSMB10,PSMB8,PSMB9,PSME1,PSME2,RSAD2,SELL,SOCS1,STAT1,STAT2,STAT3,TAP1,TAP2,TAPBP,TLR3,TLR9,TNF,TNFSF10,TRIM21,VCAM1
CD40LG	1.126	cytokine	Activated	6.60606	bias	8.86E-52	-51.0526	314 (12)	ASCC3,ATF3,B2M,BATF,BCL2A1,BIRC3,CASP1,CCL19,CCL2,Ccl2,CCL20,CCL4,CCL5,CCR5,CCR7,CD40,CD40LG,CD69,CD86,CXCL10,CXCL13,CXCL2,CXCL3,DUSP2,EIF2AK2,FAS,GCH1,GZMB,ICAM1,IDO1,IFI44,IFIT1,IFIT2,IFIT3,IFNB1,IL10,IL10RA,IL12RB1,IL13RA1,IL15,IL1B,IL21R,IL2RA,IL2RB,IL3RA,IL6,IRF1,IRF2,ISG15,JAK2,JUNB,MARCKSL1,MX1,NAMPT,NFKB2,NFKBIE,NOS2,PLAUR,PLEK,PML,PSMB10,PSMB8,PSMB9,PSME1,PSME2,RELB,RGS1,SAMSN1,SELE,SELL…
CHUK		kinase	Activated	6.57351	bias	1.76E-37	-36.7545	316 (13)	AMPD3,ATF3,CASP4,CCL11,CCL19,CCL2,Ccl2,CCL3L3,CCL4,CCL5,CCRN4L,CH25H,CTSZ,CXCL10,CXCL13,CXCL2,CXCL3,CXCL6,CYP7B1,FAS,GBP2,GCH1,GRN,HLA-A,ICAM1,IFI16,IFI35,IFIT1B,IFIT2,IFNA4,IFNB1,IL10,IL1RN,IL6,IRG1,ISG15,JUNB,LCN2,MMP13,MMP3,NFKB2,NGF,PLSCR1,PTX3,RELB,RGS16,SELE,Slfn2,SNX10,SOCS3,TNF,TNFAIP2,TNFAIP3,TNFRSF1B,TNIP1,VCAM1
IL1		group	Activated	6.5232	bias	6.66E-25	-24.1765	290 (16)	ADAMTS4,CASP1,CCL2,Ccl2,CCL20,CCL4,CCL5,CCR7,CD40,CD40LG,CFB,CLEC7A,CSF2RB,CXCL10,CXCL11,CXCL3,FAS,FPR1,HP,HSD11B1,ICAM1,IDO1,IFNB1,IL10,IL1B,IL1RL1,IL1RN,IL2RA,IL2RB,IL6,IRF1,KRT72,MMP13,MMP3,NGF,NOS2,NRG1,SAA1,SELE,SELL,SELP,SERPINE1,SOCS3,TAC1,TGM2,TIMP1,TLR2,TNF,TNFAIP3,TNFAIP6,TNFRSF1B,TNFSF10,VCAM1,VCAN,XDH
TGM2	1.591	enzyme	Activated	6.51996	bias	5.05E-23	-22.2967	315 (19)	AMICA1,BCL2A1,BIRC3,CCL2,CCRL2,CD300C,CD86,CSRNP1,CXCL10,FCER1G,GCA,HK3,IFI35,IFIT1,IFIT2,IFIT3,IL10RA,IL1B,IL6,IRF9,LRRC25,LY6E,NPC2,OAS1,OAS2,OASL,PARP14,PARP9,PLEKHO2,PLSCR1,SAMHD1,SELL,SELP,SLAMF7,SLFN5,SP110,STAT1,TAP1,THBS1,TNF,TNFAIP2,TNIP1,UBA7,XAF1
IL2		cytokine	Activated	6.44309	bias	7.15E-30	-29.1457	342 (16)	AMICA1,BIRC3,CASP1,CCL11,CCL2,CCL3L3,CCL4,CCL5,CCR5,CCR7,CD274,CD40,CD40LG,CD69,CD86,CSF2RB,CSRNP1,CXCL10,CXCL3,Cxcl9,DUSP2,FAS,FCER1G,FCGR3A/FCGR3B,GDF15,GZMA,GZMB,Gzmc,HCK,ICAM1,IDO1,IL10,IL10RA,IL12RB1,IL18BP,IL1B,IL1RL1,IL2RA,IL2RB,IL2RG,IL6,IRF1,ISG20,JAK2,LCK,LCP2,LRRC32,Ly6a (includes others),LY6E,MX1,NMI,NOS2,OSM,PDE4B,PNP,PRF1,PTPRC,RGS16,SELL,SELPLG,SERPINB9,SOCS1,SOCS3,STAT3,STAT4,TIMP…
IL1A		cytokine	Activated	6.39491	bias	3.24E-24	-23.4895	301 (14)	ADAMTS4,ADORA2A,APOD,BCL3,BIRC3,CCL11,CCL2,CCL20,CCL4,CCL5,CD274,CD40,CD86,CXCL10,CXCL2,CXCL3,FAS,GBP1,GCH1,GNB4,HDC,HSD11B1,ICAM1,IL10,IL1B,IL1RN,IL2RA,IL6,LCN2,MMP13,MMP3,NFKBIZ,NGF,NOS2,PTX3,SAA1,SELE,SERPINA3,SERPINE1,TAC1,TLR2,TNF,TNFAIP3,VCAM1
Ifn		group	Activated	6.30807	bias	1.03E-38	-37.9872	294 (14)	B2M,CD40,CD69,CD86,CH25H,CXCL10,CXCL11,DHX58,EIF2AK2,FAS,HLA-A,ICAM1,IDO1,IFI16,IFIH1,IFIT1,IFITM3,IL10,IL10RA,IL15,IL15RA,IRF1,IRF7,IRF8,ISG15,ISG20,LCN2,MX1,Mx1/Mx2,NOS2,OAS2,OASL,PML,PTAFR,RSAD2,SECTM1,SERPINE1,SOCS1,STAT1,TAP1,TLR1,TLR2,TLR3,TRIM21,XDH,ZBP1
P38 MAPK		group	Activated	6.2955	bias	7.07E-25	-24.1506	318 (17)	ANGPT1,ATF3,BATF2,BCL2A1,CAV3,CCL11,CCL2,Ccl2,CCL3L3,CCL5,CCR7,CD40,CD69,CD86,CXCL10,CXCL11,CXCL3,CXCL6,CYBB,DES,DUOX2,FAS,FBXO32,GBP1,HP,ICAM1,IFNB1,IL10,IL1B,IL1RL1,IL1RN,IL2RA,IL6,IRF7,JUNB,MMP13,MMP3,NGF,NOS2,NOS3,NR4A3,PLAUR,PML,RRAD,SELE,SERPINE1,SOCS3,STAT1,THBS1,TIMP1,TLR2,TNF,TNFSF10,TNIP1,VCAM1,ZFP36
IFNL1		cytokine	Activated	6.22247	bias	1.27E-42	-41.8962	292 (15)	ATF3,C19orf66,CCR7,CD40,CHAC1,CXCL10,CXCL11,EIF2AK2,GBP1,HERC6,IFI35,IFI44,IFIH1,IFIT1,IFIT2,IFIT3,IFITM3,IL10,IL6,IRF9,ISG15,ISG20,LGALS3BP,MX1,OAS1,OAS2,OASL,PHF11,PLSCR1,PML,PSMB9,RSAD2,SP110,STAT1,TDRD7,TLR2,TMEM140,TRIM14,UBE2L6,USP18,ZC3HAV1
SMARCA4		transcription regulator	Activated	6.20912	bias	1.09E-09	-8.96257	332 (21)	BAK1,BATF,BCL2A1,C19orf12,CASP1,CCL2,CCRL2,CTSS,DES,DHRS9,EHF,FAS,GBP1,HCLS1,HLA-E,HLA-F,ICAM1,ICAM2,IFI16,IFIT1,IFITM3,IL15RA,IL1B,IL6,INPP1,IRF1,LPXN,NFKB2,NFKBIZ,NPC2,PDE4B,PLAUR,PLIN2,PSMB9,PTX3,RGS1,SERPINE1,SLAMF9,SLC43A3,TAP1,TAPBPL,TLR2,TMEM171,TNFRSF14,TNFRSF9,TNFSF10,UBD
SASH1		other	Activated	6.16441	bias	8.49E-39	-38.0711		ARID5A,CCL4,CD40,CMPK2,CXCL10,DAXX,HDC,HELZ2,IFIT1B,IFIT2,IFIT3,IFNB1,Iigp1,IL15,IL15RA,IL6,IRF1,IRF7,IRGM,ISG15,ISG20,Mx1/Mx2,NFKBIZ,NMI,OASL,PML,RSAD2,SOCS1,STAT1,STAT2,TIMELESS,TLR3,TNF,TNFSF8,Trim12a,TRIM21,USP25,Vnn3
IFN Beta		group	Activated	6.16098	bias	7.48E-45	-44.1261	275 (14)	ATF3,BAK1,C3AR1,CCR7,CD274,CD40,CD69,CD86,CXCL10,CXCL11,EIF2AK2,HLA-A,HLA-G,IDO1,IFI16,IFI35,IFI44,IFIH1,IFIT1,IFIT1B,IFIT2,IFIT3,IL10,IL15,IL15RA,IL1B,IL1RN,IL6,IRF1,IRF7,IRF9,ISG15,KRT34,MX1,Mx1/Mx2,N4BP1,NOS2,OAS1,OAS2,OASL,PNPT1,RSAD2,SOCS1,STAT1,STAT2,TAPBP,TLR3,TNF,TNFSF10,TRIM14,USP18,XAF1,ZBP1
NFATC2		transcription regulator	Activated	6.09772	bias	2.45E-27	-26.6108	397 (21)	BATF,CCL3L3,CD40,CD40LG,CMPK2,CXCL10,CXCL3,DAXX,FAS,HELZ2,IFIT1B,IFIT2,IFIT3,IFNB1,Iigp1,IL10,IL15,IL2RA,IRF1,IRF7,IRGM,ISG15,ISG20,Mx1/Mx2,NFKBIZ,NMI,OASL,PML,RGS1,RSAD2,SELE,SOCS1,SOCS3,STAT1,STAT2,TLR3,TNF,TNFSF8,USP25,ZBTB32
IFN alpha/beta		group	Activated	6.03739	bias	7.21E-44	-43.1421	336 (16)	CCL2,CCL5,CCR7,CCRL2,CD40,CD69,CD86,CXCL10,CXCL16,Cxcl9,DAXX,H2-Q8,HLA-A,IDO1,IFI16,Ifi27l2a/Ifi27l2b,IFIT2,IFIT3,IL10,IL15,IL15RA,IL6,IRF1,IRF7,IRF8,Irgm1,Ly6a (includes others),LY6E,Mx1/Mx2,NOS2,Pmaip1,RSAD2,SERPINB9,SOCS1,Sp100,STAT1,STAT2,Tgtp1/Tgtp2,TLR1,TLR2,TLR3,TNFSF10,TRIM21
IL5		cytokine	Activated	6.02418	bias	1.47E-14	-13.8327	310 (18)	BCL3,CA4,CASP4,CCL2,CCR5,CCR7,CCRL2,CD40,CD40LG,CD69,CSF2RB,CSF3R,FAS,GBP2,GBP7,GLIPR2,ICAM1,IFNB1,IL13RA1,IL18BP,IL1RL1,IL2RA,IL2RG,IL3RA,IRF7,LCP2,LRRC8C,NOS2,PDE4B,RHOH,Serpina3g (includes others),SOCS1,TLR1,TNF,TNFRSF9,TNFSF8,UPP1,ZBTB32
DOCK8		other	Activated	6	bias	2.82E-36	-35.5498		ARID5A,CCL4,CD40,CMPK2,CXCL10,Cxcl9,DAXX,HDC,HELZ2,IFIT1B,IFIT2,IFIT3,IFNB1,Iigp1,IL15,IL15RA,IL6,IRF1,IRF7,IRGM,ISG15,ISG20,Mx1/Mx2,NFKBIZ,NMI,RGS1,RSAD2,SOCS1,STAT1,STAT2,TLR3,TNF,TNFSF8,TRIM21,USP25,Vnn3
IL17A		cytokine	Activated	5.97603	bias	2.09E-25	-24.6799	310 (12)	BCL2A1,CCL11,CCL2,Ccl2,CCL20,CCL4,CCL5,Ccl7,CD274,CD40,CXCL13,CXCL2,CXCL3,CXCL6,CYP7B1,FAS,GBP2,ICAM1,IFIT1B,IL10,IL1B,IL1RN,IL6,ISG15,LCN2,MMP13,MMP3,NFKBIZ,NOS2,NOS3,OSMR,RGS16,SELE,SELP,SOCS3,STAT3,Tgtp1/Tgtp2,TIMP1,TLR2,TLR3,TNF,TNFAIP3,VCAM1
PRL		cytokine	Activated	5.92424	bias	1.64E-37	-36.7852	332 (18)	ADAR,B2M,C19orf66,CCL2,CD40,CD69,CMPK2,CTSS,CXCL10,CXCL11,DES,DHX58,DTX3L,EIF2AK2,EPSTI1,HELZ2,HERC6,IFI35,IFI44,IFIH1,IFIT1,IFIT3,IL2RA,IL6,IRF1,IRF7,IRF9,ISG15,JAK2,LY6E,MLKL,N4BP1,NOS2,NOS3,OAS1,OAS2,PARP12,PARP14,PDK4,PDPN,PLSCR1,PNPT1,PSME1,PSME2,RSAD2,SAMHD1,SERPINA3,SHISA5,SOCS1,SOCS3,SP110,STAT1,STAT2,TDRD7,TIMP1,TMEM140,TNF,TRIM14,TRIM25,USP18,XAF1,XDH,ZCCHC2
STAT3	1.259	transcription regulator	Activated	5.91131	bias	2.27E-67	-66.644	386 (18)	ADM,ANGPT2,ANGPTL4,BAK1,BATF,BCL3,CASP1,CASP7,CCL11,CCL2,CCL20,CCL3L3,CCL4,CCL5,Ccl8,CCR5,CD274,CD40,CD40LG,CD86,CDH5,CFB,CHI3L1,CXCL10,CXCL13,CXCL2,CXCL3,CXCL6,Cxcl9,EIF2AK2,FAS,FCER1G,FCGR1A,GBP2,GZMB,H2-Q8,HLA-A,HP,HTR2A,ICAM1,IFI16,IFI35,IFI44,IFIH1,IFIT1,IFIT1B,IFIT3,IFITM3,IFNB1,IL10,IL12RB1,IL1B,IL1RN,IL2RA,IL2RB,IL6,IRF1,IRF7,IRF9,ISG15,ISG20,JAK2,JUNB,KDR,LBP,LILRB4,MMP13,MMP3,Muc1,MX1,M…
TNFSF11		cytokine	Activated	5.8292	bias	1.87E-31	-30.7282	247 (13)	AIF1,BCL2A1,BST1,C3AR1,CCL2,Ccl2,CCL3L3,CCL4,CCL5,Ccl7,Ccl8,CD300LF,CD40,CLEC4E,CSRP1,CXCL3,FAS,FGR,FPR1,GCH1,HCK,HCLS1,HRH2,ICAM1,IFNB1,IL10,IL13RA1,IL15,IL15RA,IL1B,IL1RN,IL6,IRF8,IRG1,ITGAL,JUNB,MARCKSL1,NFKB2,NFKBIZ,NOS2,PLAUR,RELB,RGS16,SERPINB9,SERPINE1,Slfn2,SOCS1,SOCS3,STAT1,TLR2,TNF,TNFRSF1B,TNIP1,TRAF1,VCAM1
IRF5	1.481	transcription regulator	Activated	5.82059	bias	3.61E-38	-37.4425	274 (17)	BAK1,CCL19,CCL4,CCL5,CMPK2,CXCL10,CXCL11,DHX58,IFI44,IFIH1,IFIT1,IFIT2,IFIT3,IFITM3,IFNA14,IFNA4,IFNB1,IL6,IRF5,IRF7,ISG15,ISG20,NAMPT,NT5C3A,OAS1,OAS2,OASL,Oasl2,PARP12,PLSCR1,RSAD2,SP110,STAT1,STAT2,TNF,TNFSF10,UBE2L6
STAT4	1.528	transcription regulator	Activated	5.70053	bias	2.41E-17	-16.618	367 (14)	ACADL,ANGPTL6,BCL3,CCL2,CCR5,CXCL10,CXCL2,CXCL3,Cxcl9,FCER1G,IFIH1,IFIT1B,IFIT2,IL10,IL10RA,IL12RB1,IL2RA,IL6,IRF1,ISG15,ISG20,MAP3K8,Ms4a4b (includes others),Mx1/Mx2,PCGF5,PLAC8,RGS16,RRAD,SELE,SELPLG,SERPINE1,SOCS3,STAT1,STK32C,TIMP1,TNF,Trim30a/Trim30d
IL12 (complex)		complex	Activated	5.61198	bias	8.19E-45	-44.0867	333 (18)	ACADL,BCL3,CASP1,CCL19,CCL2,Ccl2,CCL20,CCL4,CCL5,CCR5,CCR7,CD40LG,CD69,CD86,CXCL10,CXCL11,CXCL6,Cxcl9,FAS,GZMA,GZMB,Gzmc,ICAM1,IDO1,IFIH1,IFIT1B,IFIT2,Iigp1,IL10,IL12RB1,IL15,IL18BP,IL1B,IL2RA,IL6,IRF1,IRF8,ISG15,ISG20,ITGAL,Ly6a (includes others),MAP3K8,Ms4a4b (includes others),Mx1/Mx2,MYD88,NOS2,PLAC8,PRF1,RRAD,SELL,SELP,SELPLG,SOCS1,SOCS3,STAT4,TACR1,Tgtp1/Tgtp2,TIMP1,TLR2,TNF,TNFRSF9,Trim30a/…
IL18		cytokine	Activated	5.57316	bias	3.90E-27	-26.4089	288 (16)	CCL11,CCL2,Ccl2,CCL20,CCL3L3,CCL4,CCL5,CCR5,CCR7,CD40,CD40LG,CD69,CD86,CXCL10,CXCL11,CXCL16,CXCL3,FAS,FCGR3A/FCGR3B,ICAM1,IDO1,IL10,IL12RB1,IL18BP,IL1B,IL2RA,IL6,IRF1,MMP13,MMP3,NFKBIZ,NOS2,PRF1,SAMHD1,SELL,TACR1,TIMP1,TNF,VCAM1
CEBPB		transcription regulator	Activated	5.49851	bias	1.78E-20	-19.7496	301 (19)	ALDH1A2,APLN,BCL2A1,CCL2,Ccl2,CCL3L3,CCL4,CCL5,CCR5,CLEC4E,CSF3R,CXCL2,CXCL3,F7,FAS,GLIPR2,HDC,HLA-A,HP,HPX,HSD11B1,ICAM1,IFITM3,IL10,IL18BP,IL1B,IL1RN,IL3RA,IL6,IRF9,ITGAL,LBP,LCN2,LCP2,LYN,MMP13,MMP3,MSR1,NFKBID,NFKBIZ,NOS2,PDK4,PLAUR,SERPINE1,SOCS3,STAT3,TAC1,TLR9,TM4SF1,TNF,TNFAIP6,UPP1,VCAN,XDH
Tlr		group	Activated	5.47539	bias	3.56E-22	-21.4486	284 (17)	CASP4,CCL2,Ccl2,CCL4,CCL5,CCR7,CD40,CD86,CXCL10,CXCL3,FPR2,HLA-A,ICAM1,IDO1,IFNA14,IFNA4,IFNB1,IL10,IL1B,IL6,IRF1,IRF7,LCN2,NOS2,P2RX4,RGS1,RGS16,SOCS1,SOCS3,STAT1,TNF,TNFAIP3
IL15	2.372	cytokine	Activated	5.46627	bias	1.02E-27	-26.9914	337 (16)	CCL11,CCL19,CCL2,Ccl2,CCL4,CCL5,CD274,CD40,CD40LG,CD53,CD69,CD86,CXCL10,CXCL2,FAS,FCGR3A/FCGR3B,GGT5,GZMB,Gzmc,ICAM2,IFI35,IFIT1,IFNB1,IL10,IL12RB1,IL15RA,IL21R,IL2RA,IL2RB,IL2RG,IL6,IRF1,JUNB,Klra4 (includes others),Klrk1,LCK,LYN,MX1,MYD88,NOS2,PDE4B,PLEK,PNP,PRF1,PSMB10,PSMB8,PSMB9,PTPRC,RGS16,SELL,SELPLG,SOCS1,TIMP1,TLR2,TNF,TNFRSF9,TNFSF10,TRIM5,UPP1,VCAM1,ZFP36
F2		peptidase	Activated	5.46232	bias	3.39E-16	-15.4698	288 (20)	ADAMTS9,ALDH1B1,ANGPT1,ANGPT2,ANGPTL4,BCL3,BIRC3,CASP1,CCL2,CCL20,COL4A1,CXCL3,CYBB,DHRS9,FAM46A,ICAM1,IL15RA,IL1B,IL6,JUNB,KDR,NCOA7,NOS2,NOS3,NR4A3,PLAUR,RELB,SELE,SELP,SERPINE1,TAP2,TFPI2,THBS1,TNF,TNFAIP3,TNFSF10,TRAF1,VCAM1
DDX58		enzyme	Activated	5.30198	bias	3.56E-33	-32.4486	290 (16)	CCL5,CXCL10,EIF2AK2,GEM,IFI35,IFI44,IFIH1,IFIT1,IFIT1B,IFIT2,IFIT3,IFNA4,IFNB1,IL6,IRF1,IRF7,ISG15,ISG20,Mx1/Mx2,NMI,OAS1,Oas1d (includes others),Pmaip1,RSAD2,SOCS1,SOCS3,STAT1,STAT2,TLR3,TNF,TOR1AIP2
TLR2	2.760	transmembrane receptor	Activated	5.28878	bias	1.28E-20	-19.8928	263 (14)	ATF3,CCL2,Ccl2,CCL3L3,CCL5,CCR5,CD40,CD69,CD86,CXCL10,CXCL2,CXCL3,Cxcl9,CYBB,FPR2,ICAM1,IFNB1,IL10,IL15,IL15RA,IL1B,IL1RN,IL2RA,IL6,IRF1,MX1,MYD88,NOS2,SELE,SELP,SOCS1,SOCS3,TLR2,TNF
TCR		complex	Activated	5.19619	bias	6.20E-39	-38.2076	336 (20)	ADM,ADORA2A,APOD,BATF,BCL2A1,BCL3,BIRC3,CCL3L3,CCL4,CCL5,CCR5,CCR7,CD40LG,CD69,CXCL10,CXCL11,CXCL13,DHX58,FAS,GZMA,GZMB,IFI44,IFIH1,IFIT1,IFIT2,IFIT3,IFNB1,IL10,IL12RB1,IL2RA,IL6,IRF1,IRF7,ISG15,ISG20,JUNB,Klra4 (includes others),LCK,LCP2,MAP3K8,MX1,MYD88,N4BP1,NFKB2,OAS1,OASL,PRF1,PTK2B,PTPRC,RELB,RSAD2,SELL,SOCS1,SOCS3,STAT1,STAT3,STAT4,TLR3,TLR9,TNF,TNFAIP3,TNFRSF1B,TNIP3,VAV1,ZBTB32,ZC3HAV1,Z…
Ifn gamma		complex	Activated	5.19557	bias	5.82E-29	-28.2351	350 (18)	ADAR,CASP1,CCL2,Ccl2,CCL5,CD86,CHI3L1,CXCL10,CXCL16,Cxcl9,CYBB,EIF2AK2,GBP1,ICAM1,IL10,IL18BP,IL1B,IRF8,JAK2,Ly6a (includes others),MYD88,NOS2,NR4A3,PML,PSME1,PSME2,SOCS1,SOCS3,STAT1,TLR3,TNF,TNFRSF9,TNFSF10,XAF1
TLR7		transmembrane receptor	Activated	5.17286	bias	4.79E-22	-21.3197	309 (17)	ATF3,BCL2A1,CCL2,CCL20,CCL3L3,CCL5,CCR7,CD40,CD86,CXCL10,CXCL2,CXCL3,ICAM1,IDO1,IFNA14,IFNA4,IFNB1,IL10,IL1B,IL6,IRF7,ISG15,KCNH1,Mx1/Mx2,MYD88,PTX3,RSAD2,SELE,SOCS1,STAT2,TNF,TNFAIP3
NFKB1		transcription regulator	Activated	4.95615	bias	2.52E-38	-37.5986	304 (12)	ANKRD1,B2M,BCL2A1,BCL3,BIRC3,CCL11,CCL19,CCL2,Ccl2,CCL20,CCL3L3,CCL4,CCL5,CD40,CD86,CFB,CXCL10,CXCL11,CXCL2,CXCL3,Cxcl9,CYBB,DLL4,EHF,FAS,GBP1,GFRA1,ICAM1,IFIT1B,IFNB1,IL10,IL1B,IL1RN,IL2RA,IL6,IRF1,ISG15,MAP3K8,MMP13,MMP3,MSR1,Mx1/Mx2,NFKB2,NMI,NOD2,NOS2,POU2F2,PTAFR,PTX3,RELB,SELE,SELP,STAT1,TLR2,TLR9,TNF,TNFAIP3,TNFSF10,TRAF1,VCAM1
IFNAR1		transmembrane receptor	Activated	4.90362	bias	1.25E-56	-55.9031	361 (17)	Apol9a/Apol9b,ATF3,B2M,CCL20,CCL3L3,CCL4,CCL5,CD40,CH25H,CLEC4D,CLEC4E,CMPK2,CXCL10,CXCL2,CXCL3,Cxcl3,CXCL6,Cxcl9,EIF2AK2,HLA-A,IFI16,IFI44,IFIH1,IFIT1B,IFIT2,IFIT3,IFNA4,IFNB1,IL15,IL1B,IL6,IRF7,IRG1,ISG15,Ly6a (includes others),Ms4a4b (includes others),Mx1/Mx2,NOS2,OAS1,OAS2,OASL,Oasl2,PARP12,RSAD2,RTP4,SOCS1,SOCS3,Sp100,STAT1,TAPBPL,THBS1,TLR2,TLR3,TNF,TNFAIP2,TNFAIP3,USP18
EIF2AK2	3.015	kinase	Activated	4.88656	bias	4.55E-25	-24.342	304 (19)	ATF3,EIF2AK2,FAS,IFI35,IFIT1,IFNA4,IFNB1,IL1B,IL6,IRF1,ISG15,ISG20,LGALS3BP,NFKB2,NMI,NOS2,OAS1,PARP12,PARP9,PLSCR1,PSMB10,SAMHD1,SELE,SOCS3,SP140,STAT1,TNF,TNFAIP3,UBE2L6,USP18,ZC3HAV1
IFNA1/IFNA13		cytokine	Activated	4.86344	bias	4.35E-28	-27.3615	321 (17)	CD40,CD69,CD86,CXCL10,CXCL11,DHX58,EIF2AK2,GEM,IFIH1,IFIT1,IFIT2,IL1B,IRF1,ISG15,MX1,OAS1,OAS2,PLSCR1,RSAD2,SIGLEC1,SOCS1,STAT1,STAT2,STAT4,Tgtp1/Tgtp2,TLR3,UBE2L6,ZBP1
IKBKG		kinase	Activated	4.85895	bias	5.47E-29	-28.262	298 (13)	AMPD3,Ccl2,CCL5,Ccl8,CCRN4L,CH25H,CTSZ,CXCL2,CXCL3,CXCL6,CYP7B1,GBP2,GCH1,GRN,HLA-A,ICAM1,IFI16,IFIT1B,IFNB1,IL1B,IL1RN,IL6,IRF7,IRG1,ISG15,JUNB,LCN2,NFKB2,NGF,PTX3,RELB,RGS16,Slfn2,SOCS3,TNF,TNFAIP2,TNFAIP3,TNFRSF1B,TNFSF10
MAVS		other	Activated	4.85093	bias	6.78E-31	-30.1688	301 (16)	ADAR,CCL5,CMPK2,CXCL10,CXCL2,DHX58,IFIT1,IFIT1B,IFIT2,IFIT3,IFITM3,IFNA4,IFNB1,IL6,IRF7,ISG15,ISG20,NT5C3A,OAS1,OAS2,OASL,Oasl2,PARP12,RSAD2,SOCS1,SOCS3,STAT1,STAT2,TNF,UBE2L6
Jnk		group	Activated	4.83236	bias	5.18E-18	-17.2857	253 (14)	ALDH1A2,APLN,BIRC3,CCL11,CCL2,Ccl2,CCL4,CCL5,CCR7,CD40,CD69,CD86,CXCL6,FAS,FBXO32,GDF15,ICAM1,IFNB1,IL1B,IL2RA,IL6,MMP13,MMP3,NOS2,PLAUR,PLSCR1,SELE,SERPINE1,SOCS3,TGM2,TIMP1,TNF,VCAM1,VCAN,ZFP36
TNFSF12		cytokine	Activated	4.79504	bias	3.69E-24	-23.433	230 (14)	ADAM8,ANKRD2,BST1,CCL11,CCL19,CCL2,Ccl2,CCL3L3,CCL5,Ccl7,CCR5,CLEC4D,CLEC4E,CXCL10,CXCL2,CXCL3,CXCL6,FBXO32,ICAM1,IL1B,IL6,MMP13,MMP3,NFKB2,PTX3,SELE,TIMP1,TNF,TRIM63,VCAM1
RIPK2	1.178	kinase	Activated	4.78904	bias	3.00E-19	-18.5229	282 (15)	ACADL,Ccl2,CCL5,CD40,CD69,CD86,CLEC4E,CXCL10,CXCL2,CXCL3,ICAM1,IFNB1,IL6,IRG1,MARCKSL1,MCOLN2,MEFV,NFKB2,NOS2,PDE4B,SELE,TNF,TRAF1,VCAM1
NOD2	1.300	other	Activated	4.74932	bias	1.45E-24	-23.8386	313 (14)	ALDH1A2,BCL2A1,CCL2,CCL5,CD40,CLEC4E,CXCL10,CXCL2,CXCL3,ICAM1,IFNB1,IL10,IL1B,IL6,IRG1,MAP3K8,MARCKSL1,MCOLN2,MEFV,NFKB2,NOS2,PDE4B,SOCS3,TNF,TNFAIP3,TNFRSF9,TRAF1
PARP1		enzyme	Activated	4.71844	bias	6.75E-20	-19.1707	333 (16)	CASP4,Ccl2,CCL5,CD274,CXCL10,CXCL3,Cxcl9,GBP2,GBP6,GBP7,ICAM1,Igtp,Iigp1,IL10,IL18BP,IL1B,IL6,IRGM,ITGAL,NOS2,PEG10,SELP,SOCS1,STAT1,Tgtp1/Tgtp2,TNF,VCAM1
ARHGAP21		other	Activated	4.69042	bias	2.10E-22	-21.6778		ARID5A,BATF,CXCL10,CXCL2,Cxcl9,HDC,IFIT3,IFNB1,Iigp1,IL15,IL15RA,IRF1,IRGM,ISG20,Mx1/Mx2,NFKBIZ,NMI,TLR3,TNF,TNFSF8,TRIM21,Vnn3
Tnf (family)		group	Activated	4.60238	bias	3.29E-27	-26.4828	246 (14)	ATF3,BIRC3,C3AR1,CCL2,Ccl2,CCL4,CCL5,CCR5,CD40,CD72,CD86,CXCL10,CXCL11,CXCL3,EIF2AK2,FBXO32,GFRA1,GJA5,HSD11B1,HTR2A,ICAM1,IL1B,IL6,LCN2,MMP13,NOS2,NOS3,SAA1,SELE,SELL,SERPINE1,SOCS3,TACR1,TLR2,TNFAIP3,TNFRSF1B,TNFRSF9,TRAF1,TRIM63,VCAM1
LEP		growth factor	Activated	4.55658	bias	2.08E-16	-15.6819	308 (22)	ACADL,ADAM8,ANGPT2,ANGPTL4,APAF1,BAK1,BCL2A1,CASP7,CCL2,Ccl2,CCL3L3,CCL5,CD40,COL4A1,CRHR2,CXCL10,CYBB,DLL4,FAS,Gcg,HPX,ICAM1,IL10,IL1B,IL1RN,IL6,Irgm1,JAK2,JUNB,MMP13,MMP3,NAMPT,NOS2,NOS3,NTS,PLIN2,PRF1,SELE,SELP,SERPINE1,SOCS3,STAT3,Tgtp1/Tgtp2,THBS1,TIMP1,TNF,TNFSF10,TSPO,VCAM1,ZFP36
CSF1		cytokine	Activated	4.48235	bias	1.50E-20	-19.8239	345 (18)	CCL2,Ccl2,CCL5,Ccl7,CCR5,CXCL2,CXCL3,CXCL6,FAS,FCER1G,FCGR3A/FCGR3B,GDF15,IFNB1,Iigp1,IL10,IL10RA,IL18BP,IL1B,IL1RL1,IL6,IRF5,IRF7,JUNB,MSR1,NFKB2,PTPRC,SIGLEC1,SIRPB1,STAT1,THBS1,TLR1,TLR2,TLR9,TNF,TNFRSF1B,VCAM1
PAF1		other	Activated	4.47214	bias	1.84E-18	-17.7352		BIRC3,CCL3L3,CCL5,FAM46A,HELZ2,IDO1,IFI44,IFIT3,IFITM3,ISG15,ISG20,NFKBIZ,OAS2,OASL,PLAUR,PNP,SERPINE1,ZC3HAV1,ZFP36,ZNFX1
PI3K (complex)		complex	Activated	4.4597	bias	2.44E-15	-14.6126	245 (17)	APLN,ATF3,BAK1,BIRC3,CCL2,Ccl2,CCL4,CD274,CD40LG,CD86,CXCL10,CYBB,DLL4,FBXO32,ICAM1,IFIT1,IFNB1,IL10,IL1B,IL1RN,IL6,IRF2,KDR,LCN2,MMP13,MTHFD2,NFKB2,NOS2,NOS3,SAMHD1,SELL,SERPINE1,SOCS3,TGM2,THBS1,TNF,TNFSF10,TRIM25,VCAM1
Map3k7		kinase	Activated	4.45276	bias	9.01E-26	-25.0453	286 (15)	Ccl2,CCL3L3,CCL4,CCL5,Ccl7,CMPK2,CXCL10,CXCL3,Cxcl9,IFIT2,IFNB1,IL10,IL15,IL15RA,IL1B,IL6,ISG15,ISG20,Mx1/Mx2,NFKBIZ,NGF,NOD2,RSAD2,TLR3,TNF,VCAM1,Vnn3
IL27		cytokine	Activated	4.38989	bias	6.71E-22	-21.1733	347 (17)	B2M,CCL2,CCL20,CCL4,CCL5,CD86,CXCL10,CXCL11,GBP2,GZMB,HLA-A,HLA-E,ICAM1,IL10,IL15RA,IL18BP,IL1B,IL1RN,IL2RA,IL6,IRF1,LAG3,MX1,NOS2,SOCS1,SOCS3,STAT1,STAT2,TAP1,TNF,TNFSF10,TNFSF14,UBD
CD14		transmembrane receptor	Activated	4.3626	bias	1.09E-22	-21.9626	228 (12)	BCL2A1,CCL2,Ccl2,CCL3L3,CCL4,CCL5,CXCL10,CXCL2,IFIT1,IFNB1,IL10,IL10RA,IL13RA1,IL1B,IL2RA,IL6,NOS2,SELE,SELP,SOCS1,SOCS3,TLR2,TNF,TNFAIP3
JAK2	1.298	kinase	Activated	4.3607	bias	1.39E-18	-17.857	291 (23)	CASP1,CCL2,Ccl2,CCL5,CST7,CXCL10,CYBB,F10,GBP2,HTR2A,ICAM1,IL1B,IL6,IRF1,JAK2,LY6E,LYN,NOS2,OSM,OSMR,PSMB9,SELP,SLAMF9,SOCS3,STAT1,STAT3,TAP1,THBS1,TNF
TBK1		kinase	Activated	4.26721	bias	8.49E-33	-32.0711	345 (17)	CCL3L3,CCL4,CCL5,CD40,CMPK2,CXCL10,CXCL11,CXCL2,CXCL3,Cxcl9,HDC,ICAM1,IFIT1,IFIT1B,IFIT2,IFNA4,IFNB1,Iigp1,IL10,IL15,IL15RA,IL1B,IL6,IRF7,IRG1,ISG15,ISG20,Mx1/Mx2,NFKBIZ,NMI,RSAD2,SELE,TLR2,TLR3,TNF,Vnn3
TMEM173	1.894	other	Activated	4.26582	bias	3.29E-21	-20.4828	309 (15)	C15orf48,CCL5,CXCL2,Cxcl9,GBP5,HAP1,HDC,IFI16,IFNA4,IFNB1,IL1B,IL6,LCN2,NOS2,OASL,RGS16,Serpina3g (includes others),TNF,UPP1
NFKBIA		transcription regulator	Activated	4.25886	bias	6.49E-36	-35.1878	277 (13)	AMPD3,ANKRD1,BCL2A1,BCL3,BIRC3,CASP4,CCL11,CCL2,Ccl2,CCL20,CCL3L3,CCL5,Ccl7,CCRN4L,CD40,CD69,CD86,CH25H,CTSZ,CXCL10,CXCL11,CXCL2,CXCL3,CXCL6,CYP7B1,ERAP1,FAS,GBP2,GCH1,GRN,GZMB,HLA-A,HPSE,ICAM1,IFI16,IFIT1B,IFNB1,IL10,IL15,IL15RA,IL1B,IL1RN,IL2RA,IL6,IRF1,IRG1,ISG15,JUNB,LCN2,LITAF,LY6E,MMP13,MMP3,NFKB2,NFKBIE,NGF,NOD2,NOS2,PTX3,RELB,RGS16,SELE,Slfn2,SOCS3,TAC1,TACR1,TIMP1,TLR2,TNF,TNFAIP2,TNFAIP…
JAK1		kinase	Activated	4.22627	bias	9.88E-19	-18.0052	296 (16)	CCL2,CCL3L3,CD40,EIF2AK2,HLA-A,HLA-F,ICAM1,IFIT2,IL1B,IRF1,IRF9,MX1,OSMR,PSMB9,SOCS3,STAT1,TAP1,TNF,USP18
CD44		enzyme	Activated	4.22118	bias	2.12E-16	-15.6737	338 (22)	ADAM8,BIRC3,CCL19,Ccl2,CCL4,CCL5,Ccl7,CCR5,CCR7,CD69,CDH5,CLEC7A,CXCL6,Cxcl9,FAS,IL10,IL1B,IL1RN,IL2RA,IL6,LHX6,LTBP1,Ly6a (includes others),MMP13,MMP3,NFKB2,SELL,TCIRG1,THBS1,TNF,VCAM1
IFN type 1		group	Activated	4.20383	bias	3.63E-26	-25.4401	302 (18)	Bst2,Ccl2,CCL5,CD69,CXCL10,Cxcl9,DHX58,EIF2AK2,IDO1,IFI16,IFIH1,IFIT1,IFIT1B,IFIT2,IL6,IRF1,ISG15,Mx1/Mx2,OASL,PML,STAT1,STAT2,TNFSF10,UBA7,XDH
IL13		cytokine	Activated	4.1238	bias	5.55E-33	-32.2557	358 (22)	ADORA2A,ALDH1A2,ATF3,BATF,BCL2A1,BCL3,C3AR1,CASP1,CASP7,CCL11,CCL2,Ccl2,CCL20,CCL3L3,CCL4,CCL5,Ccl7,Ccl8,CCR5,CD40,CD72,CD86,CHI3L1,CLCA1,CLEC4E,CLEC7A,CTSS,CXCL2,CXCL3,CXCL6,CYBB,FAS,FCGR1A,FPR2,HDC,HPSE,HSD11B1,ICAM1,IDO1,IL10,IL13RA1,IL1B,IL1RL1,IL1RN,IL3RA,IL6,KRTAP3-3,LILRB3,LTBP1,MMP13,MMP3,NOS2,RIPK2,SAMSN1,SELP,SERPINB3,SERPINE1,SLC43A3,SOCS1,SOCS3,TGM2,THBS1,TIMP1,TLR1,TNF,TNFRSF1B,VCAM1…
IL3		cytokine	Activated	4.09138	bias	1.18E-15	-14.9281	298 (16)	BIRC3,CCL11,CCL19,CCL2,CD40,CD40LG,CD53,CD69,CD86,EIF2AK2,FAS,GZMA,HLA-A,HOXB4,ICAM1,IL1B,IL1RL1,IL2RA,IL3RA,IL6,JUNB,LCN2,LILRB4,LY9,LYN,MID1,OSM,PDPN,PSME1,SELE,SELL,SERPINA3,Serpina3g (includes others),SLAMF7,SOCS1,SOCS3,STAT4,TLR2,TNF,TNFRSF9,TNFSF10,TNFSF8,VCAM1
TRADD		other	Activated	4.07128	bias	2.41E-19	-18.618	256 (14)	BCL2A1,CCL2,CXCL11,CXCL2,CXCL3,ICAM1,IFNB1,IL6,IRF1,RIPK2,RND1,TNF,TNFAIP2,TNFAIP3,TRAF1,UBD,VCAM1
TRAF6		enzyme	Activated	4.06497	bias	6.16E-16	-15.2104	276 (15)	BIRC3,CCL2,CD274,CXCL13,CXCL2,ICAM1,IFNB1,IL10,IL15,IL1B,IL6,IRF5,MMP13,NOS2,RELB,SELE,SERPINA3,TNF,TNFAIP3
BAX		transporter	Activated	3.94211	bias	7.40E-15	-14.1308	334 (20)	APAF1,BAK1,CCL5,CTSS,CXCL10,H2-T10,HLA-A,IFNA4,IFNB1,IL15,IL6,IRF7,Mx1/Mx2,Oas1b,TGM2,TIMP1,TNF,TRIM6-TRIM34
TNFRSF1A		transmembrane receptor	Activated	3.89517	bias	1.63E-22	-21.7878	256 (17)	ANGPT2,BIRC3,CCL19,CCL2,Ccl2,CCL20,CCL3L3,CCL4,CCL5,CXCL10,CXCL13,CXCL2,CXCL3,ICAM1,IFNB1,IL15,IL1B,IL6,KDR,LBP,LCN2,LGALS9B,MMP13,NOS2,SAA1,SELE,SELL,SELP,SERPINE1,SOCS3,TNF,TRAF1,VCAM1
STAT2	4.007	transcription regulator	Activated	3.88709	bias	4.60E-29	-28.3372	300 (14)	CCL19,Ccl2,CCL5,CXCL10,GBP1,IFI35,IFIT1,IFIT1B,IFIT2,IFIT3,IL10,IL6,IRF1,IRF5,IRF7,IRF9,ISG15,MX1,OAS1,OAS2,PSMB8,RSAD2,SOCS1,TNF,TNFSF10,USP18,WARS
FADD		other	Activated	3.85664	bias	2.02E-35	-34.6946	277 (17)	ARID5A,ASB13,BIRC3,CASP7,Ccl2,CXCL10,CXCL2,DES,DHX58,EIF2AK2,ELMOD2,ETNK1,FAS,ICAM1,IFIH1,IFIT1B,IFIT2,IFNA4,IFNB1,IL6,IRF5,IRF7,JUNB,LY6E,Mx1/Mx2,PARP11,PIWIL4,PSMB8,RNF114,SOCS1,Sp100,STAT1,STAT2,TLR3,TNF,TNFAIP3,TRAFD1,USP25
TRPV4		ion channel	Activated	3.83482	bias	1.73E-17	-16.762	295 (17)	Ccl2,CCL3L3,CCL5,Ccl7,Ccl8,CXCL10,CXCL2,CXCL6,FAS,IL6,SOCS3,THBS1,TIMP1,TLR2,VCAM1
IL12B		cytokine	Activated	3.80001	bias	1.13E-19	-18.9469	361 (18)	Ccl2,CCL5,CCR5,CD86,CXCL10,GZMB,ICAM1,IL10,IL1B,IRF9,MAP3K8,NOS2,PIK3AP1,SELPLG,SOCS1,SOCS3,STAT1,STAT2,STAT3,STAT4,TNF,VCAM1
TLR5		transmembrane receptor	Activated	3.7714	bias	1.38E-16	-15.8601	310 (17)	ATF3,CCL11,Ccl2,CCL20,CCL4,CCL5,CD40,CD86,CXCL2,CXCL3,ICAM1,IL10,IL15,IL1B,IL6,MYD88,TNF
IFNA4	21.000	cytokine	Activated	3.74487	bias	1.73E-17	-16.762	314 (16)	CD69,CXCL10,CXCL11,IFIH1,IFIT1,IFIT2,IFNA4,ISG15,MAP3K8,MX1,Mx1/Mx2,OASL,STAT4,USP18,ZBP1
C5		cytokine	Activated	3.67296	bias	2.29E-14	-13.6402	261 (15)	ATF3,CCL11,CCL2,Ccl2,CCL3L3,CCL4,CCL5,CXCL2,CXCL3,CYBB,FCGR1A,GDF15,ICAM1,IL10,IL1B,IL6,MMP3,SELE,SERPINE1,TNF,TNFAIP2,TNFAIP3,VCAM1,ZFP36
IL12 (family)		group	Activated	3.6445	bias	1.27E-14	-13.8962	372 (19)	BCL3,CCL4,CCL5,CCR5,CD274,CD40LG,CD69,CD86,FCGR3A/FCGR3B,IDO1,IL10,IL2RA,IL6,IRF1,IRF8,NFKBIZ,PRF1,SAMHD1,STAT1,STAT4,TNF,TNFSF10
IL6R		transmembrane receptor	Activated	3.64244	bias	1.11E-16	-15.9547	312 (19)	CCL2,CCL5,CXCL10,CXCL2,CXCL3,CXCL6,HP,ICAM1,IL10,IL1B,IL6,IRF1,MMP13,MMP3,NAMPT,SAA1,SERPINA3,SOCS3,TAC1,TIMP1,TNF,VCAM1
ERK1/2		group	Activated	3.64081	bias	1.64E-26	-25.7852	311 (18)	ANGPT2,ANKRD2,APLN,B2M,BCL2A1,BIRC3,CAV3,CCL11,CCL2,Ccl2,CCL20,CCL3L3,CCL4,CCL5,CCR7,CD40,CD86,CXCL10,CXCL3,CXCL6,CYBB,HLA-A,ICAM1,IFIT1,IFNB1,IL10,IL1B,IL2RA,IL6,JUNB,MMP13,MMP3,NAMPT,NOS2,NR4A3,PLAUR,PSMB10,PSMB8,PSMB9,RHOC,SERPINE1,SOCS3,TAC1,TACR1,TAP1,TAP2,TAPBP,TIMP1,TNF,TRIM63,VCAM1,VCAN
SPI1		transcription regulator	Activated	3.59759	bias	1.64E-13	-12.7852	349 (18)	CCR7,CD180,CD72,CHI3L1,CSF2RB,CSF3R,CTSS,Cxcl9,CYBB,FCER1G,HK3,IFIT1B,IL10,IL1B,IL1RN,IL2RA,IRF9,ISG15,Klra4 (includes others),LILRB3,NOS2,PML,PSMB10,PSMB8,PSMB9,PTPRC,TLR2,TNF,TNFRSF14,VAV1
TNK1		kinase	Activated	3.59211	bias	4.00E-17	-16.3979	277 (12)	IFI16,IFIH1,IFIT1B,IFIT2,IL10,IL6,IRF7,ISG20,NOS2,Oas1b,OAS2,TLR9,TNFSF10
Hbb-b2		other	Activated	3.4641	bias	1.59E-09	-8.7986	226 (7)	Ccl2,Ccl7,CCR5,CLEC7A,CXCL10,Cxcl9,IL10RA,IL1B,IL2RB,IL2RG,LY86,TLR2
IRF8	1.736	transcription regulator	Activated	3.4556	bias	4.94E-25	-24.3063	341 (16)	ATF3,B2M,CCL5,CCR7,CD40,CD86,CFB,CSF3R,CTSS,CXCL16,Cxcl9,CYBB,FAS,GBP1,ICAM1,IDO1,IFIT2,IFNA4,IFNB1,IL15,IL1B,IL6,IRF5,IRF8,ISG15,MSR1,NOS2,OAS1,Pmaip1,PML,STAT1,TLR3,TLR9,TNF,TRIM21
FZD9		g-protein coupled receptor	Activated	3.42929	bias	3.36E-15	-14.4737	154 (7)	Ccl2,CCL5,CXCL10,CXCL6,IFI16,Ifi27l2a/Ifi27l2b,IFI44,IFIT1B,IRF7,ISG15,Oasl2,STAT1
NOS2	5.333	enzyme	Activated	3.42179		1.64E-24	-23.7852	305 (17)	BCL2A1,CAV3,CCL2,Ccl2,CCL3L3,CCL4,Ccl7,CD53,CD86,CHI3L1,CLEC4D,COL4A1,CSF3R,CXCL2,CXCL3,Cxcl9,FAS,H2-T10,IFIT1B,IFIT3,IFNB1,IL10,IL1B,IL1RN,IL6,ISG15,KDR,LCK,LCN2,LGALS3BP,LILRB4,NOS2,NOS3,PLSCR1,PRF1,SERPINA3,Slfn2,Tgtp1/Tgtp2,TIMP1,TNF,TNFSF10,TOR3A
TYROBP		transmembrane receptor	Activated	3.41982	bias	1.06E-10	-9.97469	301 (17)	CCL2,CCR7,CD40,CD69,CD86,ICAM1,IDO1,IL6,Klra4 (includes others),NOD2,SIRPB1,TCIRG1,TNF
TP53		transcription regulator	Activated	3.39713		1.23E-15	-14.9101	354 (19)	ADAM8,ALDH1A2,ANGPT1,APAF1,APOBEC1,ATF3,BAK1,BCL2A1,BCL3,BIRC3,CASP1,CASP4,CCL2,Ccl2,CCL3L3,CCL4,CD47,CLCA2,CLIC4,COL4A1,CSF3R,CSRP1,DCK,DHRS9,DOK1,DUSP2,ENG,FAS,GBP1,GDF15,HDC,ICAM1,IER5,IFI16,IFI35,IL10,IL10RA,IL12RB1,IL1B,IL21R,IL2RA,IL6,IRF5,IRF7,IRF8,IRF9,ISG15,JUNB,LTBP1,Ly6a (includes others),MAP3K8,MMP13,MMP3,MX1,Mx1/Mx2,NAMPT,NFKB2,NOS2,NOS3,OAS1,P2RX4,PDE4B,PEG10,PFKFB3,PLAUR,Pmaip1,PML…
PARP9	4.114	enzyme	Activated	3.29252	bias	2.17E-13	-12.6635	200 (7)	HLA-E,IFI44,IFIT1,IFIT2,IFIT3,IRF2,IRF7,ISG15,OAS2,SP110,STAT1
ITK		kinase	Activated	3.28692	bias	2.57E-10	-9.59007	291 (17)	CCL5,FAS,FCER1G,HLA-A,IL10,IL10RA,IL2RB,Klra4 (includes others),Klrk1,Ly6a (includes others),LYN,SCIMP,Serpina3g (includes others),SLAMF7,STAT4,TNF,TNFSF10
CD40	2.753	transmembrane receptor	Activated	3.28369	bias	2.39E-30	-29.6216	297 (15)	BCL2A1,BIRC3,CCL2,Ccl2,CCL4,CCL5,CD40,CD40LG,CD69,CD86,CXCL10,Cxcl9,FAS,HSH2D,ICAM1,IFNB1,IL10,IL10RA,IL13RA1,IL15,IL15RA,IL1B,IL1RN,IL2RA,IL2RB,IL6,IRF1,ITGAL,Ly6a (includes others),MMP3,NFKB2,NOS2,PSMB10,PSMB9,SAMSN1,SELE,SELL,SERPINE1,SLAMF7,TAP1,TAP2,TAPBP,TLR2,TLR9,TNF,TNFAIP3,TNFRSF9,TNFSF10,TRAF1,VCAM1
TNFRSF1B	1.390	transmembrane receptor	Activated	3.20965	bias	2.15E-16	-15.6676	329 (19)	ANGPT2,CCR5,CD69,CXCL13,FAS,ICAM1,IFNB1,IL2RA,IL6,LBP,MMP13,MMP3,MSR1,NOS2,SAA1,SELL,SERPINE1,SOCS3,TIMP1,TNF,TNFAIP3,TRAF1
IL7		cytokine	Activated	3.18848	bias	2.26E-11	-10.6459	301 (19)	CCL2,Ccl2,CCL4,CD274,CD69,CD86,CXCL3,FAS,IL2RA,IL6,Ly6a (includes others),LYN,MMP13,MX1,RGS16,SELL,SOCS1,SOCS3,TNF,TNFRSF9,TNFSF10,TNFSF8,UPP1
KRT17		other	Activated	3.15296	bias	1.27E-18	-17.8962		CCL11,CCL3L3,CCL4,CCL5,CCR5,CLEC7A,CXCL10,CXCL2,CXCL3,CXCL6,IL10,IL15,IL1B,IL6,MMP13,MMP3,TNF
MAPK9		kinase	Activated	3.14399	bias	2.32E-18	-17.6345	272 (21)	BAK1,BIRC3,CCL2,Ccl2,Ccl7,HDC,IFI16,IFNA4,IFNB1,Iigp1,IL15RA,IL1B,IL6,IRF9,ISG20,JUNB,LGALS3BP,MARCKSL1,MMP3,NMI,NOS2,NOS3,PARP14,PLIN2,PTX3,SELPLG,TLR3,TNF,TNFAIP3,TNFSF8,Vnn3,ZFP36
LDL		complex	Activated	3.104	bias	9.79E-32	-31.0092	346 (14)	ABCG1,APOBEC3B,ATF3,BCL2A1,CASP1,CCL2,Ccl2,CCL20,CCL4,CCL5,CCR7,CD40,CD40LG,CDH5,CXCL10,CXCL11,CXCL13,CXCL2,CXCL6,CYBB,DLL4,DUSP2,FCGR1A,GJA5,ICAM1,IDO1,IFIT2,IFNB1,IL10RA,IL1B,IL1RN,IL6,IRF2,IRF7,MMP3,MSR1,MX1,NAMPT,NOS2,NOS3,NPC2,NR4A3,PLIN2,PTAFR,SELE,SELP,SERPINE1,SIGLEC1,SOCS1,SOCS3,TNF,TNFAIP3,TNFAIP6,VCAM1
MOG		other	Activated	3.09888	bias	4.29E-17	-16.3675	318 (16)	Ccl2,CCL3L3,CCL5,Ccl7,CCR5,CD274,CD40,CD86,CXCL10,CXCL2,Cxcl9,ICAM1,IL10,IL6,ITGAL,MMP3,NOS2,TNF,VCAM1
IL12A		cytokine	Activated	3.06666	bias	1.13E-19	-18.9469	324 (18)	CCL5,CD86,CXCL10,FAS,ICAM1,IL10,IL12RB1,IL1B,IL6,IRF9,MMP3,NOS2,PRF1,SELPLG,SOCS1,SOCS3,STAT1,STAT2,STAT3,STAT4,TNF,VCAM1
IL17RA		transmembrane receptor	Activated	3.05273	bias	4.99E-17	-16.3019	286 (15)	CCL11,Ccl2,CCL20,CSF3R,CXCL2,CXCL3,CXCL6,IFNB1,IL1B,IL6,MMP13,MMP3,SELE,SELP,TIMP1,TNF
TNFSF10	4.305	cytokine	Activated	2.978		6.92E-19	-18.1599	257 (13)	ANGPT1,ANGPT2,BAK1,BIRC3,CD69,EIF2AK2,HLA-A,HLA-F,IFI16,IFIT1,IFNB1,IL1RN,IL2RA,IL6,IRF9,ISG15,MMP3,PSME2,SELE,STAT1,TIMP1,TNF,TNFAIP2,TNFAIP3,TNFSF10,TRAF1
EBI3		cytokine	Activated	2.93659	bias	7.10E-09	-8.14874	357 (19)	B2M,CD86,GBP2,HLA-A,ICAM1,IL10,IRF1,MX1,STAT1,STAT2,TAP1,TNFSF10
IL21		cytokine	Activated	2.92235	bias	2.72E-19	-18.5654	328 (16)	BATF,CCL11,CCL20,CCL5,CCR7,CD40LG,CD69,CD86,CXCL10,CXCL13,GZMA,GZMB,HSH2D,IDO1,IL10,IL21R,IL2RA,IL2RB,IL6,Klra4 (includes others),MYD88,NOS2,PRF1,PTPRC,SELL,SOCS1,SOCS3,STAT3,STAT4,TNF
VIPR1		g-protein coupled receptor	Activated	2.89031	bias	9.69E-18	-17.0137	270 (17)	Ccl2,CCL3L3,CCL4,CCL5,CD40,CD86,CXCL10,CXCL2,CXCL3,IL10,IRF1,NOS2,TNF
Fibrinogen		complex	Activated	2.87706	bias	5.41E-17	-16.2668	259 (14)	BCL3,CCL2,Ccl2,CCL3L3,CCL4,CD40,CXCL3,FCGR3A/FCGR3B,ICAM1,IL1B,IL6,SELP,TLR2,TNF
ETS1		transcription regulator	Activated	2.62871	bias	2.19E-10	-9.65956	340 (21)	CASP1,CCL2,Ccl2,CCL5,CDH5,GZMA,HPSE,ICAM1,IL10,IL2RA,IL2RB,JUNB,Klra4 (includes others),Klrk1,LAIR1,LCK,MMP13,MMP3,MSR1,NOS3,PEG10,PML,PRF1,SELL,SERPINE1,TNF,TNFSF14
IL4		cytokine	Activated	2.62812	bias	9.97E-56	-55.0013	310 (16)	ALDH1A2,ANKRD55,APOLD1,ASCC3,BCL3,CCL11,CCL2,Ccl2,CCL20,CCL3L3,CCL4,CCL5,Ccl7,CCR5,CCR7,CCRN4L,CD300A,CD40,CD40LG,CD69,CD86,CLEC7A,CSF2RB,CSF3R,CST7,CXCL10,CXCL11,CXCL16,CXCL2,CXCL3,CXCL6,Cxcl9,FAS,FCER1G,FCGR3A/FCGR3B,FPR2,GBP2,GBP7,GIMAP1-GIMAP5,GLIPR2,GZMA,HCK,HCLS1,HSD11B1,HSH2D,ICAM1,IDO1,IFI16,IFIT1B,IFIT3,IFNB1,Iigp1,IL10,IL10RA,IL12RB1,IL13RA1,IL15,IL15RA,IL1B,IL1RL1,IL1RN,IL2RA,IL2RB,IL3…
CREBBP		transcription regulator	Activated	2.55107	bias	1.24E-22	-21.9066	347 (18)	ADORA2A,ANGPT1,ARID5A,B2M,CCL5,CCR5,CCR7,CD53,CDH5,CST7,CXCL10,Cxcl9,CYBB,EPSTI1,EVI2A,Gcg,GFRA1,GIMAP1-GIMAP5,GIMAP4,HLA-G,HSD11B1,IFIT1B,IFNA4,IFNB1,IL10,IL10RA,IL12RB1,IL2RA,IL2RB,IL6,IRF1,ISG15,LGALS3BP,MAP3K8,NOS2,NR4A3,PRF1,PSMB9,RSAD2,RTP4,SELE,SELP,SERPINA3,SLC43A1,SOCS3,STAT4,TAP2,TAPBP,TLR2,TNF,TNFAIP3,TNFSF10,TRAF1,TRIM26,USP18,VCAM1
IRAK4		kinase	Activated	2.42184	bias	1.22E-27	-26.9136	332 (14)	ATF3,BIRC3,Ccl2,CCL20,CCRN4L,CD86,CSRNP1,CXCL10,CXCL16,CXCL2,CXCL3,CXCL6,GEM,IFIT1B,IFNB1,IL10,IL1B,IL6,IRF1,IRF5,IRF7,MAP3K8,NFKBIZ,NOS2,PDE4B,PLSCR1,RGS16,SOCS1,TNF,TNFAIP3,ZFP36
IKBKE		kinase	Activated	2.33324	bias	2.99E-22	-21.5243	304 (18)	ADAR,BIRC3,Ccl2,CCL3L3,CCL5,CXCL10,HLA-A,IFI16,IFIH1,IFIT1,IFIT2,IFIT3,IFNA4,IFNB1,IL6,IRF7,IRG1,MMP13,MMP3,NOS2,RSAD2,STAT1,TNF
TGFB1		growth factor	Activated	2.3318	bias	3.49E-30	-29.4572	345 (18)	ABCG1,ADAMTS4,ADM,ANGPT1,ANGPTL4,ANKRD1,APLN,ARF4,B2M,BCL3,C3AR1,CASP1,CASP4,CCL11,CCL2,Ccl2,CCL20,CCL3L3,CCL4,CCL5,Ccl7,Ccl8,CCR5,CCR7,CCRL2,CD300A,CD40,CD69,CD72,CD86,CDH5,CDHR1,CHI3L1,CLCA2,CLIC4,COL4A1,CRHR2,CSRP1,CTSS,CXCL10,CXCL2,CXCL3,CYBB,DAXX,DES,DOK1,DTX4,ENG,FAS,FCER1G,FCGR1A,FCGR3A/FCGR3B,FPR2,GBP1,GBP2,GDF15,GEM,GNB4,GZMA,GZMB,HRH2,ICAM1,ICAM2,IFI16,IFIH1,IFIT3,IL10,IL10RA,IL15,IL1B,…
Hbb-b1		transporter	Activated	2.28968	bias	2.78E-11	-10.556	308 (13)	Ccl2,Ccl7,CCR5,CLEC7A,CXCL10,Cxcl9,ICAM1,IL10RA,IL1B,IL2RB,IL2RG,LY86,TLR2,VCAM1
TIRAP		other	Activated	2.1219	bias	2.82E-20	-19.5498	282 (14)	CCL4,CCL5,CD40,CD86,CXCL10,CXCL2,CXCL3,CXCL6,ICAM1,IFNB1,IL10,IL15,IL1B,IL6,IRF1,SELE,TNF,VCAM1
CSF3		cytokine	Activated	2.00261	bias	5.89E-20	-19.2299	312 (19)	BATF,BIRC3,C3AR1,Ccl2,CCL3L3,CCL5,CCR7,CD300LF,CSF3R,CYBB,DES,FCGR1A,FPR1,GZMB,HDC,ICAM1,IL10,IL1RN,IL6,LBP,LCN2,Ly6a (includes others),NOS3,PLSCR1,RGS1,SELL,SOCS1,SOCS3,STAT3,TLR2,TNF,TNFAIP3,TNFRSF1B,TNFSF10,VCAM1
TREM1		transmembrane receptor		1.86726	bias	2.54E-25	-24.5952	349 (20)	ATF3,Ccl2,CCL20,CCL5,CCR7,CCRL2,CD274,CD86,CFB,CXCL10,CXCL2,CXCL3,FNDC3A,GEM,GLA,IDO1,IFIT2,IL10,IL15RA,IL1B,IL1RL1,IL6,IRF1,ISG15,LRRC8C,LY9,MAP3K8,MCOLN2,MYD88,NFKB2,NOD2,OASL,PLAC8,RGS1,RGS16,RRAD,SLAMF7,TFPI2,THBS1,TIFA,TLR2,TNF,TNFSF14,TNIP3
Ige		complex		1.83648	bias	5.88E-14	-13.2306	305 (19)	CCL11,CCL2,Ccl2,CCL3L3,CCL4,CCL5,CD86,CXCL2,DUSP2,FCER1G,FCGR1A,HDC,IL10,IL1B,IL6,TLR9,TNF
BCR (complex)		complex		1.76471	bias	1.12E-14	-13.9508	253 (16)	BCL2A1,CCL4,CCR7,CD300A,CD69,CD86,FAS,GBP2,GZMB,HSH2D,IL10,IL12RB1,IL2RA,IL2RB,JAK2,JUNB,LAIR1,LCK,MS4A6A,POU2F2,PTAFR,SELL,SLAMF7,TLR9,TNFSF8
CCR2		g-protein coupled receptor		1.70034	bias	3.93E-20	-19.4056	278 (19)	CCL11,CCL2,Ccl2,CCL3L3,CCL4,CCL5,Ccl7,Ccl8,CCR5,CD40,CD86,CXCL10,CXCL13,CXCL2,CXCL3,CXCL6,Cxcl9,IL10,IL1B,IL6,ITGAL,MMP13,TIMP1,TNF
STAT5A		transcription regulator		1.31163		7.10E-12	-11.1487	323 (20)	BCL2A1,BIRC3,CASP4,CCL3L3,CCR5,FAS,FCER1G,GZMA,Gzmc,ICAM1,IL2RA,IL2RB,IL6,IRF1,Klra4 (includes others),Klrk1,OSM,PRF1,RAB19,SOCS1,SOCS3,TNF,TNFRSF14,TNFRSF9,TRAF1,WARS,ZFP36
MSR1	1.789	transmembrane receptor		1.20712		4.31E-16	-15.3655	302 (21)	CCL5,CXCL10,CXCL2,CXCL3,IFIT1,IFIT1B,IL10,IL1B,IL6,IRG1,ISG15,NOS2,TNF
CAMP		other		1.1365	bias	1.11E-16	-15.9547	300 (18)	BAK1,CCL2,Ccl2,CCL20,CCL4,CCL5,Ccl7,CCR7,CD86,CSF3R,CXCL10,CXCL3,FPR2,ICAM1,IL10,IL1B,IL6,MYD88,NOS2,TNF,TNFAIP2,TNFAIP3
Immunoglobulin		complex		1.09126		4.95E-30	-29.3054	337 (16)	ADM,BCL2A1,BCL3,C3AR1,CCL2,Ccl2,CCL4,CCL5,CD274,CD40LG,CD69,CD86,CSF2RB,CTSZ,CXCL10,CXCL11,CXCL2,CXCL3,EIF2AK2,FAS,FCER1G,FCGR1A,FCGR3A/FCGR3B,FPR1,Gzmc,HCK,HK3,ICAM1,IDO1,IFNB1,IL10,IL10RA,IL1B,IL2RA,IL6,IRF1,LAG3,LILRB3,Ly6a (includes others),NAIP,NAMPT,NLRP3,NOS2,NOS3,PLSCR1,RSAD2,TIMP1,TLR2,TNF,UBD,VCAM1,VCAN
IRF9	2.686	transcription regulator		0.664863		3.08E-24	-23.5114	288 (15)	CCL19,CXCL10,Cxcl9,GBP1,IFIT2,IFIT3,IFNB1,IRF1,IRF5,IRF7,IRF8,ISG15,MX1,OAS2,SOCS1,SOCS3,STAT1,STAT2,Tgtp1/Tgtp2,TNF,TNFSF10
ID3		transcription regulator		0.418121		4.14E-11	-10.383	309 (18)	APAF1,BATF,BCL3,CCR7,CD40LG,CD72,FCER1G,ICAM1,IFI16,IL10,IL10RA,IL2RB,IL6,IRF5,IRF8,JAK2,NR4A3,SELE,SELL,SOCS3,STAT4,TNFSF10,TNFSF14,TNFSF8,TOX2,TRAF1
IgG		complex		0.293696	bias	2.55E-16	-15.5935	241 (16)	ADM,B2M,CCL11,CCL2,Ccl2,CCL4,CCL5,CD40,CD86,FCGR1A,HLA-E,IFITM3,IFNB1,IL10,IL1B,IL1RN,IL2RA,IL6,ISG15,LCN2,LY9,NGF,PDPN,PLAUR,SERPINE1,SLAMF7,TAPBP,TNF,TNFAIP3,VCAM1,ZFP36
KRAS		enzyme		0.141842		1.55E-16	-15.8097	309 (18)	AGRN,B2M,BAK1,Basp1,BIRC3,CASP1,COL4A1,CXCL10,EIF2AK2,FAS,GRN,Hmga2,IFIT1,IFITM3,IGF2BP2,IL1B,IRF1,IRF2,IRF9,ISG15,LIPG,Ly6a (includes others),MMP3,MX1,NOS2,OAS1,PDE4B,PDPN,PTK2B,Pvr,RAB20,RHOC,SERPINA3,Slfn2,STAT1,STAT2,STAT3,TAP1,THBS1,TNF,TNFAIP2,Trim30a/Trim30d,UPP1,VCAN,VMP1
FAS	1.177	transmembrane receptor		0.0885067		1.33E-22	-21.8761	268 (11)	BCL2A1,BIRC3,CCL2,Ccl2,CCL20,CCL3L3,CCL4,CCL5,CCRL2,CD300C,CD86,COL4A1,CXCL10,CXCL11,CXCL2,CXCL3,CXCL6,FAS,FPR1,GBP1,GBP2,HLA-F,ICAM1,IFIT1,IL10,IL10RA,IL13RA1,IL15RA,IL1B,IL6,IRF1,LILRB4,MMP13,NFKBIE,NOS2,OSM,P2RX4,PLIN2,PSTPIP1,PTX3,RND1,RSAD2,SELP,SERPINB9,SERPINE1,STK38L,TLR2,TNF,TNFAIP3,TNFAIP6,TNFRSF1B,TNFSF10,TWF2,VCAM1,ZFP36
MAP3K7		kinase		0.00887339	bias	1.68E-25	-24.7747	325 (14)	BIRC3,Ccl2,CCL20,CCL5,Ccl7,CCR7,CFB,CH25H,CXCL10,CXCL2,CXCL6,GBP1,GBP2,GCH1,IFIH1,IFIT1,IL1B,IL6,IRF1,IRF7,MMP13,MMP3,SAA1,SELE,SERPINE1,TNF,TNFSF10,XAF1
ID2		transcription regulator		-0.512989		3.20E-09	-8.49485	183 (7)	BATF,BCL3,CCR7,CD40LG,FCER1G,ICAM1,IFI16,IL10,IL10RA,IL2RB,IRF5,IRF8,JAK2,NR4A3,POU2F2,SELL,SOCS3,STAT4,TNFSF10,TNFSF14,TNFSF8,TOX2,TRAF1
IL10	4.057	cytokine		-0.660514		2.10E-58	-57.6778	349 (16)	ADM,BCL2A1,BCL3,BDKRB1,CCL11,CCL19,CCL2,Ccl2,CCL20,CCL3L3,CCL4,CCL5,CCR5,CCR7,CD274,CD40,CD72,CD86,CLCA1,CLEC7A,CSF2RB,CTSS,CTSZ,CXCL10,CXCL11,CXCL13,CXCL2,CXCL3,CXCL6,Cxcl9,EHF,FAS,FCER1G,FCGR1A,FCGR3A/FCGR3B,FPR1,GZMA,GZMB,HLA-G,ICAM1,IDO1,IFIT2,IFNB1,Igtp,Iigp1,IL10,IL10RA,IL1B,IL1RN,IL6,IRF1,ITGAL,LAG3,LILRB4,MAP3K8,MEFV,MSR1,MYD88,NFKBID,NOD2,NOS2,NOS3,NR4A3,OSM,PDE4B,PSMB9,PTAFR,PTX3,RGS16,…
IRF2	1.203	transcription regulator		-0.675412		1.21E-30	-29.9172	279 (15)	B2M,CASP1,CTSS,CXCL10,EIF2AK2,ERAP1,GBP1,IFI35,Ifi47,IFNB1,IL1B,IL6,IRF1,IRF7,IRF8,ISG15,OAS1,PSMB10,PSMB8,PSMB9,PSME1,PSME2,SOCS1,TAP1,TAP2,TAPBP,TLR3,TNFSF10,TRIM21,USP18,VCAM1
STAT6		transcription regulator		-0.753435	bias	2.01E-30	-29.6968	352 (15)	ANKRD55,APOLD1,BCL3,CCL11,CCL2,Ccl2,CCL20,CCL3L3,CCL5,CCR5,CCR7,CD40,CD69,CST7,CTSS,CXCL10,CXCL3,FCER1G,FCGR1A,FCGR3A/FCGR3B,GBP2,H2-T22,HCK,IFI16,IFIT3,IL10,IL10RA,IL15,IL1RN,IL6,INPP1,IRF1,IRF7,ISG15,ISG20,LGALS3BP,LILRB4,Ly6a (includes others),MOV10,Ms4a4b (includes others),Mx1/Mx2,PLSCR1,SAMSN1,SELE,SELP,SERPINB3,SERPINE1,SOCS1,STAT2,STAT4,Tgtp1/Tgtp2,TNF,Trim30a/Trim30d,VCAM1,ZFP36
S100A8		other		-0.810421		9.88E-19	-18.0052	278 (20)	ABCG1,ADAMTS4,CCL11,Ccl2,CD274,CXCL10,CXCL2,CXCL3,Cxcl9,ICAM1,IDO1,IL10,IL1B,IL6,MMP13,MMP3,NOS2,TNF,VCAM1
SATB1		transcription regulator		-0.945389		1.41E-09	-8.85078		BCL2A1,CD40,CD69,CD86,CSF3R,CYBB,EPSTI1,EVI2A,FCGR1A,GDF15,HELZ2,IL10RA,IL2RA,IRF7,IRF8,LAG3,RELB,RGS1,SELL,TNF,UBE2L6,WARS,XAF1
PROC		peptidase		-1.75227	bias	1.09E-18	-17.9626	330 (16)	ANGPT1,ANGPT2,BCL2A1,CCL2,Ccl2,CXCL2,CXCL3,ICAM1,IL1B,IL6,NFKB2,NOS2,NOS3,SELE,SERPINE1,THBS1,TLR2,TNF,TNFAIP3,VCAM1
HMOX1		enzyme		-1.89581		6.72E-17	-16.1726	294 (20)	ABCG1,ADORA2A,ANGPT1,ANGPT2,APAF1,CCL2,Ccl2,CXCL10,CXCL2,CXCL3,ENG,ICAM1,IFNB1,IL10,IL1B,IL1RN,IL6,KDR,MSR1,NOS2,SELE,THBS1,TNF,TNFSF14,VCAM1,ZFP36
CNOT7		transcription regulator		-1.98248	bias	1.00E-16	-16	202 (7)	B2M,CMPK2,HERC6,IFI35,ISG15,LGALS3BP,OAS1,OAS2,PARP12,PLSCR1,PSMB8,SP110,STAT1,TAP1,TAP2,UBE2L6
CD28		transmembrane receptor	Inhibited	-2.35391	bias	1.64E-15	-14.7852	357 (18)	BCL2A1,CCL4,CCR5,CD274,CD40LG,CD69,CD86,CH25H,CXCL13,CXCL2,FCER1G,GBP1,GBP2,GZMA,GZMB,IL10,IL10RA,IL12RB1,IL15RA,IL1B,IL21R,IL2RA,IL6,IRF1,IRF8,ITGAL,LTBP1,MSR1,NAIP,NAMPT,NFKB2,NOS3,PDE4B,PNP,RHOC,SOCS1,SOCS3,TFPI2,THBS1,TNF,TNFAIP3,TNFRSF1B,TNFSF10
VIP		other	Inhibited	-2.77751		7.21E-14	-13.1421	282 (16)	CCL2,Ccl2,CCL3L3,CCL4,CCL5,CD274,CD40,CD86,CXCL10,CXCL2,CXCL3,IL10,IL1B,IL1RL1,IL2RA,IL6,IRAK2,IRF1,NOS2,PRF1,TLR1,TLR9,TNF
KLF2		transcription regulator	Inhibited	-2.8641	bias	3.16E-20	-19.5003	283 (17)	ADM,ANGPT2,APLN,BCL3,CCL2,Ccl2,CCL4,CCL5,Ccl7,CCR5,CCR7,CD40,CD40LG,COL4A1,CXCL2,FGR,HPSE,IL1B,IL1RL1,IL6,JUNB,KDR,LBP,NOS3,SELL,SERPINE1,STAT1,TFPI2,THBS1,TIMP1,TNF,VAV1,VCAM1
BCL6		transcription regulator	Inhibited	-3.2163	bias	3.66E-13	-12.4365	327 (17)	BCL2A1,BCL3,CCL2,Ccl2,Ccl7,CCR7,CD69,CD72,CXCL10,FAS,IL10,IL13RA1,IL21R,IL2RA,IL2RB,IL6,IRF8,IRF9,JUNB,LITAF,Ly6a (includes others),NOS2,SERPINE1,SOCS3,TNFRSF14
DNASE2		enzyme	Inhibited	-3.39476	bias	1.77E-26	-25.752		Apol9a/Apol9b,CH25H,CXCL10,CXCL2,DHX58,IFIT1B,IFIT3,IFNB1,IRF7,ISG15,Ly6a (includes others),Ms4a4b (includes others),Mx1/Mx2,OAS1,Oasl2,RSAD2,RTP4,SLAMF8,Sp100,TNF,USP18,ZBP1
TAB1		enzyme	Inhibited	-3.45619	bias	1.02E-24	-23.9914	257 (15)	BIRC3,CCL20,CCL5,CFB,CH25H,CXCL10,GBP1,GBP2,GCH1,IFIH1,IFIT1,IL1B,IL6,IRF7,MMP13,SAA1,SELE,SERPINE1,TNFSF10,XAF1
DUSP1		phosphatase	Inhibited	-3.49186		2.55E-20	-19.5935	262 (15)	CCL2,Ccl2,CCL20,CCL3L3,CCL4,CD40,CD86,CXCL2,CXCL3,CYBB,IL10,IL1B,IL1RN,IL6,ISG20,NOS2,PLAUR,PLIN2,SELE,TLR2,TNF,VCAM1,VNN1,ZFP36
IRF4		transcription regulator	Inhibited	-3.60152	bias	2.87E-17	-16.5421	355 (16)	B2M,Ccl2,CCL20,CTSS,CXCL10,CXCL11,CXCL3,GBP1,IL10,IL12RB1,IL15RA,IL1B,IL6,IRF1,IRF5,IRF7,IRF9,ISG15,ITGAL,JAK2,OAS1,PHF11,PLAUR,PLSCR1,STAT1,STAT2,TNF,TNFRSF9,TNFSF10,TRIM21
USP18	5.954	peptidase	Inhibited	-3.68295	bias	1.55E-18	-17.8097	259 (18)	Ccl2,CCL3L3,CXCL10,IFITM3,IL6,IRF1,IRF7,IRF9,ISG15,MX1,OAS1,SOCS1,SOCS3,TNFSF10
SOCS3	1.990	phosphatase	Inhibited	-3.76615	bias	6.97E-21	-20.1568	351 (17)	ATF3,Ccl2,CD40,CD86,CXCL10,FCGR1A,ICAM1,IFIT1,IFIT2,IL10,IL1B,IL1RN,IL6,IRF1,ISG20,JAK2,MX1,Mx1/Mx2,NOS2,OAS1,OAS2,SOCS1,SOCS3,STAT3,TNF,TNFRSF1B
APOE		transporter	Inhibited	-3.949	bias	9.73E-18	-17.0119	297 (16)	APOD,Ccl2,CCL3L3,CCL4,CCL5,CCR5,CD40,CD40LG,CD86,CTSS,CXCL3,CYBB,HSD11B1,ICAM1,IL10,IL10RA,IL1B,IL1RN,IL6,LCN2,LIPG,LTBP1,MMP3,MSR1,NOS2,NOS3,PTK2B,PTX3,SELE,SERPINA3,SERPINE1,SOCS3,STAT4,TCIRG1,TIMP1,TNF,TNFRSF14,TNFSF14,VCAM1
NR3C1		ligand-dependent nuclear receptor	Inhibited	-4.05118		7.75E-28	-27.1107	358 (15)	ADM,ANGPTL4,B2M,BIRC3,C4A/C4B,CARD14,CASP4,CASP7,CCL2,Ccl2,CCL3L3,CCL4,CCL5,CD40LG,CD47,CD69,CORO2A,CSRNP1,CXCL10,CXCL2,CXCL3,Cxcl9,DAXX,ELMOD2,ENC1,FCER1G,GBP2,GEM,GPR65,GZMA,HSD11B1,ICAM1,IFIH1,IFIT1B,IFIT2,IFNB1,IL10,IL15,IL15RA,IL1B,IL3RA,IL6,IRF1,IRF8,ISG15,LGALS8,MMP13,Mx1/Mx2,MYD88,NAIP,NAMPT,NFKB2,NLRP3,NOD2,NOS2,NOS3,OASL,PDE4B,PDPN,PLIN2,PTK2B,RIPK2,SELE,SERPINB9,SERPINE1,SLC43A1,STAT3,…
Nr1h		group	Inhibited	-4.31477	bias	6.60E-25	-24.1805	290 (15)	ABCG1,ACADL,ALDH1A2,APOD,BCL3,Ccl2,CCL3L3,CCL5,CCR5,CCR7,CD40,CLEC4E,CXCL10,GGT5,HCK,IFIH1,IFNB1,IL10,IL15,IL1B,IL6,ITGAL,MARCKSL1,Mx1/Mx2,NFKB2,NFKBIZ,NLRP3,NOS2,NOS3,Oas1b,PML,SELP,Slfn1,SP110,TAP1,THBS1,TNF
Irgm1	5.299	other	Inhibited	-4.31524	bias	5.52E-18	-17.2581	316 (11)	CCL5,CXCL10,Cxcl9,FAS,IFI16,Ifi27l2a/Ifi27l2b,IFIT1B,IFIT2,IFIT3,Iigp1,IL6,IRF7,LILRB4,OAS2,OASL,RSAD2,SELP,TNF,USP18
mir-21		microrna	Inhibited	-4.82254	bias	4.96E-41	-40.3045	371 (21)	AIF1,AOAH,Casp12,CASP4,CCL19,CCL2,CCL3L3,CD180,CD274,CDH5,CSF3R,CXCL10,Cxcl3,Cxcl9,DHX58,EIF4E3,FCGR1A,GBP2,GBP5,GBP6,GBP7,Gbp8,ICAM1,IDO1,IFI16,Ifi47,IFNB1,Iigp1,IL1B,IL6,IRF1,IRGM,Irgm1,Klrk1,MYD88,NLRP3,OAS2,PILRB,PSME2,SIGLEC1,SIRPB1,Slfn2,Sp100,STAT1,STAT2,STAT3,TAP1,Tgtp1/Tgtp2,TLR1,TLR2,TNF,TNFRSF9,TRAF1,VCAM1
MAPK1		kinase	Inhibited	-4.99141		1.79E-45	-44.7471	326 (20)	ADAR,ATF3,CAV3,CCL2,CCL3L3,CCL4,CCL5,CD69,CFB,CXCL11,DUSP2,EIF2AK2,ERAP1,GBP1,GBP2,GBP5,HDC,HLA-E,IFI16,IFI35,IFI44,IFIH1,IFIT1,IFIT2,IFIT3,IFITM3,IL12RB1,IL1B,IL1RN,IL2RA,IL6,IRF7,IRF9,ISG15,ISG20,JUNB,KRT34,KRTAP1-3,LAG3,LGALS3BP,MMP13,NMI,NOS2,OAS1,OAS2,OASL,OGFR,PARP12,PHF11,PLSCR1,PML,POU2F2,PRKG1,PSMB8,PSMB9,PSME2,RGS16,SAMHD1,SECTM1,Serpina3g (includes others),SP110,STAT1,STAT2,TAP1,TDRD7,…
NKX2-3		transcription regulator	Inhibited	-5.28185		7.95E-30	-29.0996		ADM,ANGPT2,ANGPTL4,ANKRD55,BATF2,C19orf66,CASP1,CMPK2,CSRNP1,CXCL16,DHX58,EIF2AK2,FAM46A,GBP1,GBP2,GCA,GCH1,GDF15,HELZ2,HLA-F,IDO1,IFNB1,IL18BP,LY6E,MYD88,NOS3,NT5C3A,PARP12,PARP14,PARP9,PLSCR1,PNPT1,PSMB8,PSMB9,RTP4,SP110,STAT1,STAT2,TAP1,TAP2,TFPI2,TRIM21,TRIM5,UBA7,UBE2L6,USP18,VCAM1,XAF1,ZC3HAV1,ZNFX1
ACKR2		g-protein coupled receptor	Inhibited	-5.2915	bias	2.38E-35	-34.6234		ADAR,CCL5,CXCL10,Cxcl9,DHX58,EIF2AK2,IFI16,Ifi27l2a/Ifi27l2b,IFI44,Ifi47,IFIT1B,IFIT2,IFIT3,Ifitm6,Iigp1,IL1B,IRF7,IRG1,ISG15,ISG20,OAS1,OAS2,OASL,Oasl2,RSAD2,STAT1,STAT2,USP18
Alpha catenin		group	Inhibited	-5.32501	bias	2.31E-18	-17.6364	299 (17)	ADAM8,ADAMTS4,BCL3,BIRC3,CXCL10,CXCL2,CXCL6,ENG,ICAM2,IL1B,IL2RG,IL6,IRF1,LYN,MMP13,NFKBIZ,PTX3,RELB,RHOC,SAA1,SELE,SOCS3,TGM2,TIMP1,TNF,TNFAIP2,TNFAIP3,TNFAIP6,VCAM1
IL1RN	1.802	cytokine	Inhibited	-6.1612	bias	1.61E-35	-34.7932	367 (17)	ATF3,BDKRB1,CCL2,CCL20,CHAC1,CTSS,CXCL11,CXCL3,GBP1,GSDMD,HERC6,HSD11B1,ICAM1,IFI44,IFIH1,IFIT3,IL10,IL18BP,IL1B,IL6,IRF1,IRF7,IRF9,ISG20,MX1,NGF,NOS2,OAS1,OAS2,OASL,PML,RIPK2,RSAD2,RTP4,SELE,SLC15A3,STAT2,TAC1,THEMIS2,TIMP1,TNF,TNFSF10,UBD,USP18
PTGER4		g-protein coupled receptor	Inhibited	-6.21058	bias	9.90E-47	-46.0044	325 (17)	ADAMTS4,CCL2,Ccl2,CCL20,CCL3L3,CCL4,Ccl7,CCR7,CD40,CD69,CH25H,CMPK2,CXCL10,Cxcl9,CYBB,DAXX,GBP2,GBP6,HERC6,IFI16,IFI35,Ifi47,IFIH1,IFIT1B,IFIT2,IGF2BP2,Igtp,IL10,IL1B,IL6,IRF1,IRF7,IRGM,Irgm1,ISG20,MMP13,Mx1/Mx2,NOS2,Oas1b,OSM,PARP14,RSAD2,RTP4,Serpinb6b,SLAMF8,SLFN13,SLFN5,TAGAP,Tgtp1/Tgtp2,TNF,TNFSF10,TOR3A,TRIM21,USP18,XAF1
SOCS1	2.958	other	Inhibited	-6.24222	bias	2.60E-52	-51.585	367 (18)	BAK1,BCL2A1,CCL2,Ccl2,CCR7,CD40,CD69,CD86,CXCL10,CXCL2,Cxcl9,FAS,FCER1G,GBP5,GBP6,H2-T24,ICAM1,IFI16,IFI44,Ifi47,IFIH1,IFIT1,IFIT1B,IFIT2,IFIT3,IFNB1,Iigp1,IL12RB1,IL15,IL1B,IL2RB,IL6,IRF1,IRF7,IRG1,IRGM,ISG15,ISG20,JAK2,MMP13,MX1,Mx1/Mx2,MYD88,NOS2,OAS1,OAS2,Oasl2,SELE,SOCS1,SOCS3,STAT1,STAT3,TLR3,TNF,VAV1,VCAM1
CD3		complex	Inhibited	-6.63289	bias	3.21E-27	-26.4935	338 (19)	BATF,BCL2A1,BIRC3,CCL20,CCL3L3,CCL4,CCL5,CCR5,CD274,CD40LG,CD53,CD69,CD86,CH25H,CXCL10,DUSP2,FAS,FCER1G,GBP1,GGT5,GZMA,GZMB,HPX,ICAM1,ICAM2,IFI35,IFIT1,IL10,IL12RB1,IL15RA,IL1B,IL21R,IL2RA,IL2RB,IL2RG,IL6,IRF1,IRF8,IRF9,JAK2,JUNB,LCK,LTBP1,Ly6a (includes others),LYN,MAP3K8,MSR1,MTHFD2,NAIP,NAMPT,NOS2,NOS3,PDE4B,PLEK,PLIN2,PNP,PRF1,PTPRC,RELB,RHOC,RHOH,SCO1,SELPLG,SOCS1,SOCS3,STAT1,TFPI2,TGM2,THBS…
IL10RA	1.610	transmembrane receptor	Inhibited	-7.30798		2.91E-49	-48.5361	327 (18)	ABCG1,BATF2,CCL5,CCR7,CD300LF,CD40,CD69,CFB,CLEC12A,CLEC4E,CSF3R,CST7,Cxcl9,EHF,F10,FAM26F,FAS,FOXF1,GBP2,GBP5,GBP6,Gbp8,GSDMC,H2-Q8,H2-T22,HK3,HLA-A,HPSE,IFI16,Ifi47,Iigp1,IL12RB1,IL15RA,IL18BP,IL1B,IL1RN,IL2RG,IL6,IRF1,IRF7,IRG1,IRGM,Irgm1,Klrk1,LCN2,LRG1,Ly6a (includes others),MLKL,NAMPT,NOD1,NOS2,PSMB8,PSMB9,RIPK3,RSAD2,SAMHD1,SECTM1,SELL,Serpina3g (includes others),Serpinb6b,SERPINB9,SIRPB1,…
TRIM24		transcription regulator	Inhibited	-7.35808	bias	2.72E-59	-58.5654	220 (7)	AGRN,Apol9a/Apol9b,Bst2,CMPK2,CSRP1,CXCL10,DHX58,EPSTI1,FAM26F,GBP2,HERC6,Ifi27l2a/Ifi27l2b,IFI35,IFI44,Ifi47,IFIH1,IFIT1B,IFIT2,IFIT3,Igtp,Iigp1,IRF1,IRF7,IRF9,IRGM,Irgm1,ISG15,JAK2,LGALS3BP,Ly6a (includes others),MOV10,Ms4a4b (includes others),NMI,OAS1,OASL,PARP12,PHF11,PLAC8,PSMB10,PSMB8,PSMB9,RTP4,SAMHD1,SERPINE1,SHISA5,SOCS1,STAT1,STAT2,TAP1,Tgtp1/Tgtp2,TLR2,TRAFD1,TRIM26,TRIM6-TRIM34,UBA7,U…

## Sheet: Feet USR day 7 (Fig. 1B)
IPA Upstream regulators (USR); up-regulated genes in feet day 7
Upstream Regulator	Fold Change	Molecule Type	Predicted Activation State	Activation z-score	Notes	p-value of overlap	Mechanistic Network	Target molecules in dataset
IFNG		cytokine	Activated	13.2717	bias	9.15E-137	433 (15)	ACTB,ADORA2A,AIF1,AIM2,ALOX5AP,ARG1,Art2a-ps,ATF3,B2M,BAK1,BATF2,BCL2A1,BCL3,BST1,Bst2,C1QA,C1QB,C1QC,C1R,C4A/C4B,C5AR1,CASP1,Casp12,CASP3,CASP4,CASP7,CASP8,CCL11,CCL19,CCL2,Ccl2,CCL3L3,CCL4,CCL5,Ccl6,Ccl7,Ccl8,CCR1,CCR5,CCRL2,CD2,CD274,CD4,CD40,CD72,CD74,CD86,CDKN2A,CERS6,CFB,CH25H,CIITA,CLEC4E,CLIC4,CMPK2,CORO1A,CSF2RB,CTSB,CTSC,CTSH,CTSS,CTSZ,CXCL10,CXCL16,CXCL6,Cxcl9,CXCR3,CXCR4,CYBA,CYBB,CYS…
TNF	2.979	cytokine	Activated	12.6322	bias	3.08E-83	406 (13)	ACTB,ADAM8,ADAMTS4,ADORA2A,ALOX5AP,APAF1,APLN,APOBEC3B,APOC2,ARG1,ARHGDIB,ATF3,B2M,B4GALNT1,BCL2A1,BCL3,BDKRB1,BIRC3,C5AR1,CASP1,Casp12,CASP3,CASP4,CASP7,CASP8,CCL11,CCL19,CCL2,Ccl2,CCL3L3,CCL4,CCL5,Ccl6,Ccl7,Ccl9,CCR1,CCR5,CCR7,CCRN4L,CD247,CD274,CD28,CD38,CD3E,CD4,CD40,CD47,CD5,CD69,CD86,CDKN2A,CFB,CH25H,CHI3L1,CIITA,CLEC4E,CLIC4,COTL1,CSF2RB,CST7,CTLA4,CTSB,CTSC,CTSS,CTSZ,CXCL10,CXCL16,Cxcl3,C…
Interferon alpha		group	Activated	9.38568	bias	1.07E-82	406 (16)	ADAR,AIM2,APOBEC3B,B2M,BAK1,BCL2A1,BCL3,Bst2,C3AR1,CASP1,CASP3,CASP8,CCL19,CCL2,CCL5,CCR1,CCR5,CCR7,CD38,CD40,CD69,CD86,CD8A,CH25H,CIITA,CSF2RB,CXCL10,Cxcl9,CXCR3,DAXX,DHX58,EIF2AK2,FASLG,FCER1A,FCGR1A,FCGR2B,GBP1,GBP2,HLA-A,HLA-G,ICAM1,IDO1,IFI16,IFI35,IFIH1,IFIT1,IFIT1B,IFIT2,IFIT3,IFITM3,IFNAR2,IL10,IL10RA,IL12RB1,IL15,IL18R1,IL18RAP,IL1B,IL1RN,IL21R,IL2RA,IL4R,IL6,IRF1,IRF5,IRF7,IRF8,IRF9,ISG…
IL1B	1.906	cytokine	Activated	9.0764	bias	2.03E-60	406 (14)	ADAM8,ADAMTS4,AIF1,APOC2,ARG1,ATF3,BCL2A1,BCL3,BDKRB1,BIRC3,C1R,CASP3,CASP4,CCL11,CCL2,Ccl2,CCL4,CCL5,Ccl7,Ccl9,CCR1,CCR5,CCR7,CCRL2,CCRN4L,CD274,CD4,CD40,CD69,CD74,CD86,CFB,CHI3L1,CIITA,CMPK2,CSF2RB,CSRNP1,CTSB,CTSS,CTSZ,CXCL10,CXCL6,Cxcl9,CXCR3,CXCR4,CYBA,CYBB,CYTIP,DUSP5,EBI3,FASLG,FCGR2B,FPR2,FUT7,GBP1,GBP2,GBP6,GCH1,GLA,GRN,HELZ2,HGF,HLA-A,HLA-E,HMGA1,ICAM1,IDO1,IFI16,Ifi47,IFIT1,IFIT1B,IFIT…
NFkB (complex)		complex	Activated	8.99573	bias	3.50E-43	377 (14)	ABCG1,ALDH1B1,ANKRD1,ATF3,B3GNT5,BAK1,BATF,BCL2A1,BCL3,BIRC3,C1R,CASP4,CASP7,CASP8,CCL11,CCL2,Ccl2,CCL3L3,CCL4,CCL5,Ccl7,CCR7,CD274,CD40,CD69,CD7,CD74,CD86,CFB,CIITA,CLEC4E,CST7,CXCL10,CXCL6,Cxcl9,CXCR3,CXCR4,CYBB,DAXX,DUSP2,DUSP5,ERAP1,ETS1,FASLG,FCGR1A,FPR2,GBP2,GCH1,GLA,HLA-A,HLA-DMB,HLA-F,ICAM1,ICOS,IDO1,IFNAR2,IL10,IL10RA,IL15,IL1B,IL1RN,IL2RA,IL6,IL7R,IRF1,IRF7,ISG15,ITGAL,ITGAM,KDR,LTB,NAM…
IRF7	5.279	transcription regulator	Activated	8.84573	bias	3.25E-72	347 (15)	ADAR,BC147527,CASP4,CCL19,CCL5,CCRL2,CD40,CD69,CMPK2,CTLA4,CXCL10,DAXX,DHX58,FAM26F,FCGR1A,GBP1,GBP5,HELZ2,IDO1,IFI16,IFI35,IFI44,Ifi47,IFIH1,IFIT1,IFIT1B,IFIT2,IFIT3,IFITM3,Igtp,IL15,IRF1,IRF7,IRF8,IRF9,IRGM,Irgm1,ISG15,ISG20,ITGAM,ITGAX,Ms4a4b (includes others),MX1,Mx1/Mx2,NAMPT,NMI,OAS1,OAS2,OASL,Oasl2,PARP12,PARP14,PHF11,PLAC8,PLSCR1,PSMB10,PSMB8,PSMB9,PSME1,PSME2,RSAD2,RTP4,Slfn1,SOCS1,STAT1…
STAT1	4.214	transcription regulator	Activated	8.3526	bias	3.96E-84	404 (15)	APOBEC3B,APOC2,ARG1,B2M,BATF2,CASP1,CASP3,CASP4,CASP8,CCL19,CCL2,Ccl2,CCL3L3,CCL4,CCL5,Ccl8,CCNE1,CCR7,CCRL2,CD274,CD40,CD86,CFB,CH25H,Chil3/Chil4,CIITA,CMPK2,CSF3R,CXCL10,Cxcl9,CXCR3,CYSLTR2,EIF2AK2,FAM26F,FASLG,FCER1G,FCGR1A,FCGR2B,FGL2,GBP1,GBP2,GBP5,GBP6,HERC6,HLA-DRB5,ICAM1,IDO1,IFI16,IFI35,Ifi47,IFIT1,IFIT1B,IFIT2,IFIT3,IFITM3,Igtp,IL10,IL15,IL18BP,IL1B,IL6,IRF1,IRF5,IRF7,IRF8,IRF9,IRG1,Irg…
IFNA2		cytokine	Activated	7.92426	bias	1.05E-60	369 (16)	B2M,C19orf66,C1R,C1S,CCL2,CD28,CD86,CDKN2A,CMPK2,CORO2A,CXCL10,EIF2AK2,GBP1,GBP2,HERC6,HLA-A,HLA-E,HSH2D,IFI16,IFI35,IFI44,IFIH1,IFIT1,IFIT2,IFIT3,IFITM3,IFNAR2,IL10,IL10RB,IL1B,IL2RA,IL2RB,IL6,IRF1,IRF5,IRF7,IRF9,ISG15,ISG20,LGALS3BP,LILRB4,LY6E,LYN,MX1,Mx1/Mx2,OAS1,OAS2,OGFR,PARP12,PARP9,PHF11,PLSCR1,PML,PSME1,PTAFR,RSAD2,SAMHD1,SAMSN1,SERPINB9,SH2D1A,SLC15A3,SOCS1,SOCS3,SP110,STAT1,STAT4,TAP1,…
IL2		cytokine	Activated	7.74475	bias	4.33E-65	392 (18)	AMICA1,BIRC3,CASP1,CASP3,CCL11,CCL2,CCL3L3,CCL4,CCL5,CCNE1,CCR5,CCR7,CD2,CD244,CD247,CD274,CD28,CD38,CD3D,CD3G,CD40,CD5,CD69,CD86,CD8A,CDC6,CMKLR1,CSF2RA,CSF2RB,CSRNP1,CTLA4,CTSC,CTSW,CXCL10,Cxcl9,CXCR3,CXCR4,CXCR6,CYTH4,CYTIP,DUSP2,DUSP5,ETS1,FASLG,FCER1G,FCGR3A/FCGR3B,GCNT1,GZMA,GZMB,Gzmc,HAVCR2,HCK,HCST,ICAM1,ICOS,IDO1,IFNGR2,IL10,IL10RA,IL12RB1,IL18BP,IL18R1,IL18RAP,IL1B,IL1RL1,IL27RA,IL2RA,I…
CSF2		cytokine	Activated	7.73707	bias	1.67E-51	422 (15)	ABCG1,ADA,ADAM8,ALOX5AP,APAF1,ARG1,BCL2A1,BCL3,BIRC3,C4A/C4B,C5AR1,CASP1,CCL2,Ccl2,CCL3L3,CCL4,Ccl8,CCR1,CCR5,CCR7,CD180,CD28,CD38,CD40,CD69,CD74,CD86,CD8A,CIITA,CLEC4C,CLEC7A,CSF2RA,CSF2RB,CTLA4,CTSC,CXCL10,Cxcl9,CXCR3,CXCR4,CYBB,DOK2,EFEMP2,FANCA,FCGR1A,FCGR2B,FPR2,GCH1,HDC,HGF,HLA-DQB1,HOXB4,ICAM1,ICOS,IDO1,IFITM3,IL10,IL15,IL1B,IL1RL1,IL1RN,IL2RA,IL3RA,IL6,INPP5D,IRF2,IRF5,ITGA4,ITGAM,ITGAX,L…
Ifnar		group	Activated	7.682	bias	7.18E-76	395 (16)	APOBEC3B,B2M,Bst2,CCL2,Ccl2,CCL5,CD274,CD40,CD74,CD86,CD8A,CXCL10,Cxcl9,EIF2AK2,FASLG,FCER1A,FCER1G,GBP2,H2-Q8,HLA-A,HLA-E,HLA-G,IDO1,IFI16,IFI35,IFIH1,IFIT1B,IFIT2,IFIT3,IFITM3,IL15,IL1B,IL6,IRF1,IRF7,IRF8,IRF9,Irgm1,ISG20,ITGA4,Mx1/Mx2,MYD88,OAS1,OAS2,OASL,PSMB8,PSMB9,RSAD2,Sp100,STAT1,STAT2,TAP1,TAP2,TAPBP,TLR2,TLR3,TNF,TNFSF10,TRIM21,UBE2L6,UNC93B1,USP18,VCAM1,XAF1,ZBP1
IFNB1		cytokine	Activated	7.66737	bias	1.30E-66	396 (16)	APOBEC1,Art2a-ps,BAK1,Bst2,CASP1,CASP3,CASP8,CCL2,Ccl2,CCL4,CCL5,CCR5,CCRN4L,CD274,CD38,CD40,CD86,CH25H,CLEC4E,CMPK2,CXCL10,CXCR3,DAXX,DHX58,EBI3,EIF2AK2,GBP2,GBP5,GBP6,GBP7,Gbp8,GDF3,GNB4,HLA-A,Hmga2,IDO1,IFI16,Ifi27l2a/Ifi27l2b,Ifi47,IFIH1,IFIT1,IFIT1B,IFIT2,IFIT3,Ifitm1,Igtp,IL10,IL1B,IL6,IRF1,IRF7,IRF9,IRG1,IRGM,Irgm1,ISG15,ISG20,ITGAX,MX1,Mx1/Mx2,MYD88,NFKBIE,NMI,NOD2,NOS2,OAS1,Oas1b,OAS2,PA…
TLR4		transmembrane receptor	Activated	7.55851	bias	4.59E-59	410 (20)	APOBEC3B,ARID5A,ATF3,BATF,CASP7,CASP8,CCL2,Ccl2,CCL3L3,CCL4,CCL5,Ccl7,Ccl8,CCR5,CD200R1,CD274,CD38,CD40,CD86,CFB,CMPK2,CXCL10,CXCL6,Cxcl9,DAXX,DUSP2,EBI3,FASLG,FCGR2B,FGL2,GBP2,HDC,HELZ2,HHEX,HPSE,ICAM1,IFI16,Ifi47,IFIT1B,IFIT2,IFIT3,IFITM3,Igtp,Iigp1,IL10,IL15,IL18BP,IL1B,IL2RA,IL2RB,IL6,IRF1,IRF2,IRF7,IRF8,IRGM,Irgm1,ISG15,ISG20,ITGAM,LILRB4,MX1,Mx1/Mx2,MYD88,NFKB2,NFKBID,NFKBIZ,NMI,NOD2,NOS2,O…
TICAM1		other	Activated	7.34335	bias	7.18E-47	312 (18)	APOBEC3B,BCL3,CASP4,CCL2,Ccl2,CCL3L3,CCL4,CCL5,CCRL2,CD38,CD40,CD86,CFB,CH25H,CMPK2,CXCL10,CXCL6,FPR1,FPR2,ICAM1,IFI16,Ifi47,IFIT1,IFIT1B,IFIT2,IFIT3,Igtp,IL10,IL15,IL18BP,IL1B,IL6,IRF1,IRF7,IRG1,IRGM,Irgm1,ISG15,ISG20,MEFV,Ms4a4b (includes others),Mx1/Mx2,NFKB2,NFKBIZ,OASL,RELB,RSAD2,SAMHD1,SELE,SERPINE1,SOCS1,SOCS3,TFEC,TLR2,TLR3,TNF,TNFAIP3,TNFSF10,VCAM1
TLR3	1.531	transmembrane receptor	Activated	7.1323	bias	5.50E-52	323 (16)	ADAMTS4,AIM2,ATF3,BAK1,CCL2,Ccl2,CCL3L3,CCL4,CCL5,Ccl7,CD274,CD300E,CD38,CD40,CD69,CD86,CFB,CMPK2,CXCL10,Cxcl9,DHX58,EIF2AK2,GBP2,GCH1,ICAM1,IFI16,IFI44,Ifi47,IFIH1,IFIT1,IFIT2,IFIT3,Iigp1,IL10,IL15,IL1B,IL1RN,IL6,IRF7,IRG1,ISG15,ISG20,Klrk1,LILRB4,LIPA,LIPG,LPIN2,MX1,Mx1/Mx2,MYD88,NFKBIZ,NMI,NOS2,NTS,OAS1,OASL,Oasl2,PIK3CD,PTGER2,PTX3,RGS1,RSAD2,SELE,SERPINB9,SERPINE1,SOCS3,STAT1,TIMP1,TLR3,TLR7…
MYD88	1.736	other	Activated	7.12175	bias	2.61E-39	347 (13)	APOBEC3B,ARG1,BATF,BCL3,CASP4,CCL2,Ccl2,CCL3L3,CCL4,CCL5,CCRL2,CD200R1,CD274,CD38,CD40,CD86,CH25H,CLIC4,CMPK2,CXCL10,CXCL6,Cxcl9,DAXX,EBI3,FPR1,FPR2,HDC,HLA-A,ICAM1,IFIT1B,IFIT2,IL10,IL15,IL1B,IL6,INPP5D,IRF1,IRF7,IRG1,ISG15,ITGA4,ITGAX,ITGB7,MEFV,Ms4a4b (includes others),MSR1,NFKB2,NFKBIZ,NOD2,NOS2,OASL,RELB,RSAD2,SAA1,SAMHD1,SELE,SERPINE1,SOCS1,SOCS3,TBX21,TFEC,TIMP1,TLR2,TNF,TNFAIP3,USP18,VCAM1
TGM2	1.835	enzyme	Activated	7.11365	bias	4.68E-30	345 (20)	AMICA1,BCL2A1,BIRC3,C5AR1,CCL2,CCRL2,CD300C,CD74,CD86,CD93,CSRNP1,CXCL10,CYP2R1,FCER1G,GCA,GIMAP6,HK3,IFI35,IFIT1,IFIT2,IFIT3,IL10RA,IL1B,IL6,IRF9,ITGAM,ITGAX,LRRC25,LY6E,NCF2,NLRC4,NPC2,OAS1,OAS2,OASL,PARP14,PARP9,PIM1,PLEKHO2,PLSCR1,SAMHD1,SDCBP,SELL,SELP,SEMA7A,SIRPA,SLAMF7,SLFN5,SP110,STAT1,TAP1,TNF,TNFAIP2,TYROBP,UBA7,XAF1
SMARCA4		transcription regulator	Activated	6.94021	bias	1.22E-21	402 (18)	AIM2,ARHGAP30,ARHGDIB,BAK1,BATF,BCL2A1,C19orf12,C1orf54,CASP1,CCL2,CCR1,CCRL2,CD74,CDC6,CDKN2A,CIITA,COTL1,CSF2RA,CTSB,CTSH,CTSS,CXCR3,CXCR4,CXCR6,FBLIM1,FCGR2A,GBP1,GMFG,HCLS1,HCST,HLA-E,HLA-F,ICAM1,ICAM2,IFI16,IFI30,IFIT1,IFITM3,IL1B,IL6,IL7R,IRF1,ITGA5,LGALS1,LPXN,LRMP,MYH3,MYOG,NFKB2,NFKBIZ,NPC2,PLAUR,PLEKHO1,PSMB9,PTPN7,PTX3,RAC2,RGS1,RGS2,SEMA7A,SERPINE1,SKAP2,SLAMF9,SLC11A1,SYK,TAOK3,TAP1,…
IRF1	3.770	transcription regulator	Activated	6.82356	bias	2.24E-59	406 (16)	ADAM8,B2M,BAK1,C1R,CASP1,CASP3,CASP7,CASP8,CCL19,CCL2,CCL5,CD274,CD40,CFB,CIITA,CTSS,CXCL10,CXCL16,CYBB,EIF2AK2,ERAP1,FASLG,FGL2,FPR2,GBP2,HLA-G,IDO1,IFI35,IFIH1,IFIT1,IFIT2,IFIT3,IFITM3,IL10,IL12RB1,IL15,IL18BP,IL1B,IL6,IRF1,IRF2,IRF5,IRF7,IRF9,ISG15,LTB,MX1,NOS2,OAS1,OAS2,PML,PSMB10,PSMB8,PSMB9,PSME1,PSME2,RSAD2,SELL,SOCS1,STAT1,STAT2,TAP1,TAP2,TAPBP,TLR3,TLR6,TLR9,TNF,TNFSF10,TRIM21,VCAM1
IRF3		transcription regulator	Activated	6.76348	bias	3.82E-59	301 (14)	APOBEC3B,B2M,BC147527,BIRC3,CCL19,CCL2,Ccl2,CCL3L3,CCL4,CCL5,CCRL2,CD69,CD86,CLIC4,CMPK2,CXCL10,Cxcl9,CXCR3,DAXX,DHX58,FAM26F,FCGR1A,GBP1,GBP5,HELZ2,HLA-F,IFI16,IFI44,Ifi47,IFIH1,IFIT1,IFIT1B,IFIT2,IFIT3,IFITM3,Igtp,IL10,IL15,IL1B,IL6,IRF5,IRF7,IRGM,Irgm1,ISG15,ISG20,Ms4a4b (includes others),Mx1/Mx2,NOS2,OAS1,OAS2,OASL,Oasl2,PARP12,PARP14,PHF11,PLAC8,PLCG2,Pmaip1,PNP,RSAD2,Slfn1,STAT1,STAT2,TAP1,…
IL5		cytokine	Activated	6.73218	bias	1.15E-21	456 (21)	BCL3,CASP4,CCL2,CCNE1,CCR1,CCR5,CCR7,CCRL2,CD40,CD69,CIITA,CSF2RB,CSF3R,CTSC,CXCR3,CXCR4,DUSP5,FCGR2B,FGL2,GBP2,GBP7,GLIPR2,ICAM1,IFI30,IL18BP,IL1RL1,IL2RA,IL2RG,IL3RA,IL4R,IRF7,ITGAM,ITGB7,KCNAB2,LCP2,LRRC8C,LTB,NOS2,PIM1,PKIB,RHOH,SDF2L1,Serpina3g (includes others),SLAIN1,SOCS1,TLR1,TNF,TNFRSF8,TNFRSF9,UPP1,ZBTB32,ZYX
TLR9	4.128	transmembrane receptor	Activated	6.52282	bias	8.85E-30	325 (17)	ADAMTS4,ATF3,Ccl2,CCL3L3,CCL4,CCL5,Ccl7,CCR7,CD27,CD274,CD300A,CD300E,CD40,CD69,CD86,CXCL10,EBI3,GCH1,IDO1,IFI16,IFIT1B,IFIT2,IFIT3,IL10,IL1B,IL6,IRF7,IRG1,ISG15,LAIR1,LILRB4,LIPG,Mx1/Mx2,NFKBIZ,NOS2,NTS,Oasl2,PTGER2,RSAD2,SERPINE1,SOCS1,SOCS3,STAT2,TIMP1,TLR7,TNF,TNFRSF1B,TNFSF10,USP18
PRL		cytokine	Activated	6.50156	bias	2.65E-30	362 (16)	ACTB,ACTR3,ADAR,B2M,C19orf66,CCL2,CD40,CD69,CMPK2,CTSB,CTSH,CTSS,CXCL10,DHX58,DTX3L,EIF2AK2,EPSTI1,HELZ2,HERC6,IFI35,IFI44,IFIH1,IFIT1,IFIT3,IL2RA,IL6,IRF1,IRF7,IRF9,ISG15,LY6E,MLKL,MSN,NOS2,OAS1,OAS2,PARP12,PARP14,PDPN,PIM1,PLSCR1,PSME1,PSME2,PTPN18,RHOG,RSAD2,SAMHD1,SHISA5,SOCS1,SOCS3,SP110,STAT1,STAT2,TDRD7,TIMP1,TNF,TRIM14,TRIM25,USP18,XAF1,XDH
APP		other	Activated	6.46772	bias	1.10E-34	397 (19)	ABCG1,ACTB,ADAMTS4,ADAP1,AIF1,ARG1,ARL11,ATP1A3,C1R,C1S,C4A/C4B,Casp12,CASP3,CCL2,Ccl2,CCL3L3,CCL4,CCL5,Ccl7,CCNE1,CCR5,CD40,CD69,CD74,CD86,CFL1,CH25H,Chil3/Chil4,CKB,CMPK2,CSF2RB,CTSB,CXCL10,Cxcl9,CXCR4,CYBB,DAXX,ENG,FAM49A,FASLG,FCGR1A,FCGR2A,FCGR2B,GBP2,GBP6,GNG2,HAVCR2,HERC6,HGF,HLA-E,HMGA1,ICAM1,ICAM2,IDO1,IFI16,IFI35,Ifi47,IFIH1,IFIT1B,IFIT2,IGF2BP2,Igtp,IL10,IL1B,IL6,IRF1,IRF5,IRF7,IRGM,Ir…
IL12 (complex)		complex	Activated	6.46739	bias	8.29E-62	399 (18)	BCL3,CASP1,CASP3,CCL19,CCL2,Ccl2,CCL4,CCL5,CCR5,CCR7,CD244,CD28,CD69,CD86,CXCL10,CXCL6,Cxcl9,CXCR3,CYTIP,EBI3,FASLG,FUT7,GZMA,GZMB,Gzmc,HAVCR2,ICAM1,ICOS,IDO1,IFIH1,IFIT1B,IFIT2,IFNGR2,Iigp1,IL10,IL12RB1,IL15,IL18BP,IL18R1,IL18RAP,IL1B,IL2RA,IL6,IL7R,IRF1,IRF8,ISG15,ISG20,ITGA4,ITGAL,ITGB2,KLRB1,KLRC1,KLRD1,LTB,Ly6a (includes others),Ms4a4b (includes others),Mx1/Mx2,MYD88,NCR1,NOS2,PIM1,PLAC8,PRF…
IL15	1.195	cytokine	Activated	6.45324	bias	1.31E-50	384 (18)	ARHGDIB,CASP3,CCL11,CCL19,CCL2,Ccl2,CCL4,CCL5,CCR1,CD2,CD244,CD274,CD28,CD38,CD40,CD5,CD53,CD69,CD74,CD86,CD8A,CD8B,CMKLR1,CORO1A,CTSW,CXCL10,CXCR4,CXCR6,DUSP5,ETS1,FASLG,FCGR3A/FCGR3B,FYB,GCNT1,GZMB,Gzmc,HAVCR2,HCST,ICAM2,ICOS,IFI35,IFIT1,IL10,IL12RB1,IL18R1,IL18RAP,IL21R,IL2RA,IL2RB,IL2RG,IL6,IL7R,IRF1,ITGB7,Klra4 (includes others),KLRB1,KLRC1,KLRD1,Klrk1,LCK,LYN,MX1,MYD88,NCR1,NOS2,PDCD1,PFN1,…
OSM	2.309	cytokine	Activated	6.38438	bias	1.77E-18	357 (17)	ABCG1,ADAMTS4,ARG1,B2M,BAK1,C1R,C1S,CASP4,CCL11,CCL2,Ccl2,CCL5,CH25H,CTSH,CXCL10,GBP1,GBP2,GCA,GNS,HGF,HLA-A,HLA-F,ICAM1,IFI35,IL10,IL15,IL1B,IL4R,IL6,IRF1,IRF7,IRF9,ISG20,ITGAL,KLK1,MX1,MYD88,NAMPT,NOS2,OAS1,OSM,P2RY10,PDPN,PSMB8,PSMB9,SAA1,SELE,SELP,SERPINE1,SLC7A8,SOCS1,SOCS3,STAT1,STX11,TAP1,TAP2,TAPBP,TIMP1,TLR2,TLR3,TNF,TNFAIP2,TNFRSF11A,UBE2L6,VCAM1,XDH,ZC3HAV1
IKBKB		kinase	Activated	6.33985	bias	2.97E-30	334 (13)	ANKRD1,ATF3,BIRC3,CASP8,CCL11,CCL19,CCL2,Ccl2,CCL3L3,CCL4,CCL5,Ccl9,CCR1,CCR7,CCRN4L,CDC6,CH25H,CTSB,CTSZ,CXCL10,CXCL6,Cxcl9,CXCR4,CYBA,CYP7B1,ETS1,FASLG,GBP2,GCH1,GRN,HGF,HLA-A,ICAM1,IFI16,IFIT1B,IL10,IL1B,IL1RN,IL6,IRF1,IRG1,ISG15,LTB,MX1,NFKB2,NOS2,PTK2B,PTX3,RELB,RGS16,SELE,Slfn2,SOCS1,SOCS3,TNF,TNFAIP2,TNFRSF1B,TNFRSF9,VCAM1
CD40LG		cytokine	Activated	6.28395	bias	1.26E-60	365 (12)	ATF3,B2M,BATF,BATF3,BCL2A1,BIRC3,CASP1,CCL19,CCL2,Ccl2,CCL4,CCL5,CCR1,CCR5,CCR7,CD27,CD38,CD40,CD69,CD86,CD8A,Chil3/Chil4,CIITA,CSF2RA,CTSC,CXCL10,CXCR3,CXCR4,CYTIP,DAPP1,DUSP2,DUSP5,EBI3,EIF2AK2,FASLG,FCGR2B,FSCN1,GCH1,GZMB,HLA-DQA1,HLA-DQB1,ICAM1,IDO1,IFI44,IFIT1,IFIT2,IFIT3,IL10,IL10RA,IL12RB1,IL15,IL1B,IL21R,IL2RA,IL2RB,IL3RA,IL6,IL7R,IRF1,IRF2,ISG15,ITGA4,ITGAM,ITGB7,LTB,MARCKSL1,MX1,NAMPT,N…
IL6	1.151	cytokine	Activated	6.25982	bias	3.31E-47	439 (14)	ACVRL1,ADAMTS4,ARG1,ATF3,BAK1,BATF,BCL3,C5AR1,CASP1,CASP3,CASP7,CCL11,CCL2,Ccl2,CCL3L3,CCL4,CCL5,CCNE1,CCR1,CCR5,CCR7,CD40,CD48,CD53,CD74,CD86,CDC6,CDKN2A,Chil3/Chil4,CIITA,CLEC4E,CSF2RB,CSF3R,CTSC,CXCL10,CXCL6,Cxcl9,CXCR3,CXCR4,CYBB,CYTIP,FASLG,FCGR1A,FPR2,FSCN1,GBP2,GLRX,H2-Q8,HGF,HLA-A,HLA-DMA,HLA-DQA1,HLA-DRB5,ICAM1,ICOS,IDO1,IFI16,IFIT1,IFIT1B,IFIT2,IFITM3,IL10,IL15,IL1RL1,IL1RN,IL4R,IL6,IL7…
SAMSN1	2.121	other	Activated	6.245	bias	2.07E-31	327 (12)	ARID5A,BATF,CCL3L3,CCL4,Ccl7,CD40,CMPK2,CXCL10,Cxcl9,DAXX,FGL2,HDC,HELZ2,IFIT1B,IFIT2,IFIT3,Iigp1,IL15,IL6,IRF1,IRF2,IRF7,IRGM,ISG15,ISG20,Mx1/Mx2,NFKBIZ,NMI,OASL,PML,RSAD2,SOCS1,SOCS3,STAT1,STAT2,TLR3,TNF,Trim12a,TRIM21
CHUK		kinase	Activated	6.21583	bias	7.25E-25	345 (13)	ATF3,CASP4,CCL11,CCL19,CCL2,Ccl2,CCL3L3,CCL4,CCL5,Ccl9,CCR1,CCRN4L,CH25H,CTSB,CTSZ,CXCL10,CXCL6,CXCR3,CYBA,CYP7B1,GBP2,GCH1,GRN,HLA-A,ICAM1,IFI16,IFI35,IFIT1B,IFIT2,IL10,IL1RN,IL6,IRG1,ISG15,NFKB2,PLSCR1,PTX3,RELB,RGS16,SELE,Slfn2,SNX10,SOCS3,TNF,TNFAIP2,TNFAIP3,TNFRSF1B,VCAM1
P38 MAPK		group	Activated	6.13097	bias	2.68E-16	322 (15)	ATF3,BATF2,BCL2A1,CCL11,CCL2,Ccl2,CCL3L3,CCL5,CCNE1,CCR7,CD40,CD69,CD86,CDKN2A,CXCL10,CXCL6,CYBB,ETS1,FASLG,GBP1,ICAM1,IL10,IL1B,IL1RL1,IL1RN,IL2RA,IL6,IRF7,ITGA4,ITGAM,ITGB2,MYH3,MYOG,NOS2,PLA2G7,PLAUR,PML,RRAD,SELE,SERPINE1,SLC8A1,SOCS3,STAT1,TBX21,TIMP1,TLR2,TNF,TNFSF10,VCAM1,ZFP36
IFN alpha/beta		group	Activated	6.11947	bias	2.04E-41	373 (14)	CCL2,CCL5,CCR7,CCRL2,CD40,CD69,CD86,CXCL10,CXCL16,Cxcl9,DAXX,FGL2,H2-Q8,HLA-A,IDO1,IFI16,Ifi27l2a/Ifi27l2b,IFIT2,IFIT3,IL10,IL15,IL6,IRF1,IRF7,IRF8,Irgm1,Ly6a (includes others),LY6E,Mx1/Mx2,NOS2,Pmaip1,RSAD2,SERPINB9,SOCS1,Sp100,STAT1,STAT2,Tgtp1/Tgtp2,TLR1,TLR2,TLR3,TLR7,TNFSF10,TRIM21
RELA		transcription regulator	Activated	6.06391	bias	1.16E-35	418 (16)	ANKRD1,ARHGDIB,B2M,BCL2A1,BCL3,BIRC3,CASP3,CASP8,CCL11,CCL19,CCL2,Ccl2,CCL5,CCR7,CD40,CD69,CDKN2A,CFB,CHI3L1,CIITA,CTSB,CXCL10,CXCL6,CXCR4,CYBB,ERAP1,FASLG,FSCN1,GBP1,GCH1,ICAM1,IFIT1B,IFNGR2,IL10,IL1B,IL1RN,IL2RA,IL6,IL7R,INPP5D,IRF1,IRF7,ISG15,LTB,LYN,Mx1/Mx2,MYOD1,NAMPT,NFKB2,NFKBID,NFKBIE,NMI,NOD2,NOS2,OAS2,Pmaip1,PSMB10,PSMB9,PTPN6,PTX3,RELB,SAA1,SELE,SELP,Serpina3g (includes others),TAP1,TA…
Ifn		group	Activated	6.06359	bias	4.45E-37	337 (14)	B2M,CASP8,CD40,CD69,CD86,CH25H,CXCL10,CXCR3,DHX58,EIF2AK2,HGF,HLA-A,ICAM1,IDO1,IFI16,IFIH1,IFIT1,IFITM3,IL10,IL10RA,IL15,IRF1,IRF7,IRF8,ISG15,ISG20,ITGA4,MX1,Mx1/Mx2,NOS2,OAS2,OASL,PML,PTAFR,PTPRJ,RSAD2,SECTM1,SERPINE1,SOCS1,STAT1,TAP1,TLR1,TLR2,TLR3,TLR7,TRIM21,XDH,ZBP1
STAT4	3.304	transcription regulator	Activated	6.04965	bias	1.75E-17	437 (14)	ACAP1,ACVRL1,ARHGAP15,BCL3,C10orf54,CCL2,CCR5,CXCL10,Cxcl9,FCER1G,FSCN1,FYB,HLA-DQB1,IFIH1,IFIT1B,IFIT2,IL10,IL10RA,IL12RB1,IL18R1,IL18RAP,IL2RA,IL6,IRF1,ISG15,ISG20,Ms4a4b (includes others),Mx1/Mx2,PLAC8,RGS16,RRAD,SELE,SELPLG,SERPINE1,SOCS3,STAT1,TBX21,TIMP1,TNF,Trim30a/Trim30d,UNC13D
IL1		group	Activated	6.00071	bias	5.26E-15	370 (20)	ADAMTS4,CASP1,CCL2,Ccl2,CCL4,CCL5,CCR7,CD40,CFB,CLEC7A,CSF2RB,CTSB,CTSC,CXCL10,FASLG,FPR1,HGF,ICAM1,IDO1,IL10,IL1B,IL1RL1,IL1RN,IL2RA,IL2RB,IL4R,IL6,IRF1,ITGAM,ITGB2,NOS2,SAA1,SELE,SELL,SELP,SERPINE1,SOCS3,TGM2,TIMP1,TLR2,TLR7,TNF,TNFAIP3,TNFRSF1B,TNFSF10,VCAM1,XDH
IFNL1		cytokine	Activated	5.98149	bias	2.09E-34	377 (15)	ATF3,C19orf66,CCR7,CD40,CXCL10,EIF2AK2,GBP1,HERC6,IFI35,IFI44,IFIH1,IFIT1,IFIT2,IFIT3,IFITM3,IL10,IL6,IRF9,ISG15,ISG20,LGALS3BP,MX1,OAS1,OAS2,OASL,PHF11,PLSCR1,PML,PSMB9,RSAD2,SP110,STAT1,TDRD7,TLR2,TRIM14,UBE2L6,USP18,ZC3HAV1
STAT3		transcription regulator	Activated	5.89395	bias	1.71E-56	446 (20)	ARG1,BAK1,BATF,BCL3,C5AR1,CASP1,CASP7,CCL11,CCL2,CCL3L3,CCL4,CCL5,Ccl8,CCNE1,CCR1,CCR5,CD274,CD40,CD74,CD86,CDKN2A,CFB,CHI3L1,CIITA,CTLA4,CTSB,CXCL10,CXCL6,Cxcl9,EIF2AK2,FASLG,FCER1G,FCGR1A,FSCN1,GBP2,GLIPR1,GZMB,H2-Q8,HGF,HLA-A,HLA-DMA,HLA-DQA1,HLA-DRB5,ICAM1,ICOS,IFI16,IFI30,IFI35,IFI44,IFIH1,IFIT1,IFIT1B,IFIT3,IFITM3,IKZF3,IL10,IL12RB1,IL18R1,IL1B,IL1RN,IL2RA,IL2RB,IL4R,IL6,IRF1,IRF7,IRF9,ISG1…
IL18		cytokine	Activated	5.84686	bias	4.15E-29	357 (18)	CCL11,CCL2,Ccl2,CCL3L3,CCL4,CCL5,CCR5,CCR7,CD244,CD40,CD69,CD86,CXCL10,CXCL16,CYSLTR2,FASLG,FCGR3A/FCGR3B,HAVCR2,ICAM1,IDO1,IL10,IL12RB1,IL18BP,IL18R1,IL18RAP,IL1B,IL2RA,IL6,INPP5D,IRF1,ITGAM,NCR1,NFKBIZ,NOS2,PDCD1,PRF1,SAMHD1,SELL,TBX21,TIMP1,TNF,TXK,VCAM1,XCL1
SASH1		other	Activated	5.83095	bias	1.40E-29		ARID5A,CCL4,CD40,CMPK2,CXCL10,DAXX,FGL2,HDC,HELZ2,HHEX,IFIT1B,IFIT2,IFIT3,Iigp1,IL15,IL6,IRF1,IRF7,IRGM,ISG15,ISG20,Mx1/Mx2,NFKBIZ,NMI,OASL,PML,RSAD2,SOCS1,STAT1,STAT2,TLR3,TNF,Trim12a,TRIM21
IFN Beta		group	Activated	5.80118	bias	1.35E-37	351 (16)	ATF3,BAK1,C3AR1,CCR7,CD247,CD274,CD40,CD69,CD74,CD86,CXCL10,EIF2AK2,HLA-A,HLA-G,IDO1,IFI16,IFI35,IFI44,IFIH1,IFIT1,IFIT1B,IFIT2,IFIT3,IFNAR2,IL10,IL15,IL1B,IL1RN,IL6,IRF1,IRF7,IRF9,ISG15,MX1,Mx1/Mx2,NOS2,OAS1,OAS2,OASL,RSAD2,SOCS1,STAT1,STAT2,TAPBP,TLR3,TNF,TNFSF10,TRIM14,USP18,XAF1,ZBP1
NFATC2		transcription regulator	Activated	5.79858	bias	6.00E-26	475 (18)	BATF,CASP3,CCL3L3,CCNE1,CD3G,CD40,CMPK2,CTLA4,CXCL10,DAXX,FASLG,FGL2,HELZ2,ICOS,IFIT1B,IFIT2,IFIT3,Iigp1,IL10,IL15,IL2RA,IRF1,IRF7,IRGM,ISG15,ISG20,Mx1/Mx2,NFKBIZ,NMI,OASL,PML,RGS1,RGS2,RSAD2,SELE,SOCS1,SOCS3,STAT1,STAT2,TLR3,TNF,ZBTB32
DOCK8		other	Activated	5.65685	bias	2.36E-27		ARID5A,CCL4,CD40,CMPK2,CXCL10,Cxcl9,DAXX,FGL2,HDC,HELZ2,IFIT1B,IFIT2,IFIT3,Iigp1,IL15,IL6,IRF1,IRF7,IRGM,ISG15,ISG20,Mx1/Mx2,NFKBIZ,NMI,RGS1,RSAD2,SOCS1,STAT1,STAT2,TLR3,TNF,TRIM21
IL1A		cytokine	Activated	5.59912	bias	5.82E-15	327 (15)	ADAMTS4,ADORA2A,BCL3,BIRC3,CCL11,CCL2,CCL4,CCL5,CD274,CD40,CD86,Clec2d (includes others),CXCL10,FASLG,GBP1,GCH1,GNB4,HDC,ICAM1,IFNGR2,IL10,IL1B,IL1RN,IL2RA,IL6,ITGA5,NFKBIZ,NOS2,P2RY6,PTX3,SAA1,SELE,SERPINE1,TLR2,TNF,TNFAIP3,VCAM1
TNFSF11		cytokine	Activated	5.5794	bias	3.21E-35	343 (16)	AIF1,BCL2A1,BST1,C3AR1,CCL2,Ccl2,CCL3L3,CCL4,CCL5,Ccl7,Ccl8,Ccl9,CCNE1,CCR1,CD300LF,CD40,CKB,CLEC4E,DOK2,ETS1,FGR,FPR1,GCH1,GLRX,HCK,HCLS1,HRH2,ICAM1,IL10,IL15,IL1B,IL1RN,IL6,IRF8,IRG1,ITGA5,ITGAL,ITGAM,LAT,MARCKSL1,NFKB2,NFKBIZ,NOS2,OCSTAMP,PIM1,PLAUR,PTGER2,PTGER4,RELB,RGL1,RGS16,SERPINB9,SERPINE1,SLC7A7,Slfn2,SOCS1,SOCS3,STAT1,TLR2,TNF,TNFRSF11A,TNFRSF1B,TRAF1,VCAM1
IRF5	2.274	transcription regulator	Activated	5.37748	bias	2.13E-30	304 (16)	BAK1,CASP3,CCL19,CCL4,CCL5,CMPK2,CXCL10,CXCR4,DHX58,IFI44,IFIH1,IFIT1,IFIT2,IFIT3,IFITM3,IL6,IRF5,IRF7,ISG15,ISG20,NAMPT,OAS1,OAS2,OASL,Oasl2,PARP12,PLSCR1,RSAD2,SP110,STAT1,STAT2,TNF,TNFSF10,UBE2L6
EIF2AK2	1.528	kinase	Activated	5.16088	bias	4.81E-20	339 (19)	ARG1,ATF3,EIF2AK2,IFI35,IFIT1,IL1B,IL6,IRF1,ISG15,ISG20,LGALS3BP,NFKB2,NMI,NOS2,OAS1,PARP12,PARP9,PLSCR1,PSMB10,SAMHD1,SELE,SOCS3,SP140,STAT1,TNF,TNFAIP3,UBE2L6,USP18,ZC3HAV1
DDX58		enzyme	Activated	5.14262	bias	7.70E-26	331 (17)	CCL5,CD4,CXCL10,CXCR3,EIF2AK2,IFI35,IFI44,IFIH1,IFIT1,IFIT1B,IFIT2,IFIT3,IL6,IRF1,IRF7,ISG15,ISG20,Mx1/Mx2,NMI,OAS1,Pmaip1,RSAD2,SOCS1,SOCS3,STAT1,STAT2,TLR3,TNF
F2		peptidase	Activated	5.10281	bias	5.99E-12	288 (19)	ALDH1B1,B3GNT5,BCL3,BIRC3,CASP1,CASP3,CCL2,COTL1,CXCR4,CYBB,DOCK10,ENTPD1,ETS1,HMGA1,ICAM1,IL1B,IL6,KDR,LBH,MYOG,NCF1,NCF2,NOS2,PLAUR,RAC2,RELB,SELE,SELP,SERPINE1,TAP2,TNF,TNFAIP3,TNFSF10,TRAF1,TUBB3,VCAM1
TLR7	1.370	transmembrane receptor	Activated	5.07736	bias	2.68E-18	325 (16)	ATF3,BCL2A1,CCL2,CCL3L3,CCL5,CCR7,CD40,CD86,CXCL10,GNG2,GPR84,ICAM1,IDO1,IL10,IL1B,IL6,INPP5D,IRF7,ISG15,Mx1/Mx2,MYD88,PTPN6,PTX3,RSAD2,SELE,SOCS1,STAT2,TLR7,TNF,TNFAIP3,TRPM2
IL3		cytokine	Activated	5.00579	bias	7.52E-31	366 (18)	ADA,ALOX5AP,ARHGDIB,BIRC3,C1QA,CASP3,CCL11,CCL19,CCL2,Ccl6,CD247,CD3D,CD3G,CD40,CD48,CD53,CD69,CD86,CLEC4C,CTLA4,CXCR4,DOK2,EIF2AK2,FCER1A,FCGR2A,FCGR2B,FGFR4,GZMA,HGF,HLA-A,HOXB4,ICAM1,IL1B,IL1RL1,IL2RA,IL3RA,IL6,ITGAM,ITGAX,ITGB7,LILRB4,LY75,LY9,LYN,MID1,NCF1,OSM,PDE1B,PDPN,PIM1,PLA2G7,PLCB2,PSME1,PTPN22,SELE,SELL,Serpina3g (includes others),SLAMF7,SOCS1,SOCS3,STAT4,TLR2,TNF,TNFRSF11A,TNFRSF9,T…
Jnk		group	Activated	4.99801	bias	3.42E-15	329 (14)	APLN,BIRC3,CASP3,CCL11,CCL2,Ccl2,CCL4,CCL5,CCNE1,CCR7,CD40,CD69,CD86,CXCL6,CXCR4,ETS1,FASLG,ICAM1,IL1B,IL2RA,IL6,ITGA4,ITGB7,NCF1,NOS2,PLAUR,PLSCR1,SELE,SERPINE1,SOCS3,TGM2,TIMP1,TNF,VCAM1,ZFP36
Ifn gamma		complex	Activated	4.99575	bias	3.60E-27	366 (18)	ADAR,CASP1,CASP3,CCL2,Ccl2,CCL5,CD86,CHI3L1,CXCL10,CXCL16,Cxcl9,CXCR3,CYBB,EIF2AK2,GBP1,ICAM1,IL10,IL18BP,IL1B,IRF8,Ly6a (includes others),MYD88,NOS2,PML,PSME1,PSME2,SH2D1A,SOCS1,SOCS3,STAT1,TLR3,TNF,TNFRSF9,TNFSF10,XAF1
IL27		cytokine	Activated	4.96829	bias	6.81E-31	406 (17)	B2M,CCL2,CCL4,CCL5,CD74,CD86,CIITA,CKLF,CTLA4,CXCL10,FASLG,GBP2,GZMB,HLA-A,HLA-DMA,HLA-DMB,HLA-DOA,HLA-DQA1,HLA-DQB1,HLA-E,ICAM1,ICOS,IL10,IL18BP,IL1B,IL1RN,IL2RA,IL6,IRF1,ITGAM,LAG3,MX1,NOS2,PIM1,SOCS1,SOCS3,STAT1,STAT2,TAP1,TBX21,TNF,TNFSF10,TNFSF14,UBD
Tlr		group	Activated	4.9333	bias	1.83E-16	318 (17)	ARG1,CASP4,CCL2,Ccl2,CCL4,CCL5,CCR7,CD40,CD86,CXCL10,FPR2,HLA-A,ICAM1,IDO1,IL10,IL1B,IL6,IRF1,IRF7,NOS2,P2RX4,RGS1,RGS14,RGS16,SOCS1,SOCS3,STAT1,TNF,TNFAIP3
TCR		complex	Activated	4.86392	bias	1.07E-60	421 (20)	ADORA2A,AIM2,BATF,BCAT1,BCL2A1,BCL3,BIRC3,BTLA,CCL3L3,CCL4,CCL5,CCNE1,CCR1,CCR5,CCR7,CD27,CD28,CD38,CD4,CD5,CD6,CD69,CD8B,CTLA4,CTSB,CXCL10,CXCR3,CXCR4,CYTIP,DHX58,FASLG,GFI1,GNPDA1,GZMA,GZMB,ICOS,IFI44,IFIH1,IFIT1,IFIT2,IFIT3,IL10,IL12RB1,IL18R1,IL2RA,IL4R,IL6,IL7R,IRF1,IRF7,ISG15,ISG20,ITGB7,Klra4 (includes others),LAT,LCK,LCP2,LIPA,LPIN2,MX1,MYD88,NFKB2,OAS1,OASL,PDCD1,PIK3CD,PIM1,PRF1,PTK2B,P…
NFKB1		transcription regulator	Activated	4.8537	bias	3.64E-32	363 (13)	ANKRD1,B2M,BCL2A1,BCL3,BIRC3,CCL11,CCL19,CCL2,Ccl2,CCL3L3,CCL4,CCL5,CD3G,CD40,CD86,CFB,CIITA,CSF2RA,CTSB,CXCL10,Cxcl9,CYBB,EBI3,FASLG,FSCN1,GBP1,HLA-DMB,ICAM1,IFIT1B,IFNGR2,IL10,IL1B,IL1RN,IL2RA,IL6,IRF1,ISG15,LTB,MSR1,Mx1/Mx2,NFKB2,NMI,NOD2,NOS2,POU2F2,PTAFR,PTPN6,PTX3,RELB,SELE,SELP,STAT1,TLR2,TLR9,TNF,TNFAIP3,TNFSF10,TRAF1,VCAM1
ITK	2.827	kinase	Activated	4.84912	bias	7.37E-25	371 (17)	CCL5,CD244,CD4,CD7,CYSLTR2,FASLG,FCER1G,HLA-A,IL10,IL10RA,IL18RAP,IL2RB,Klra4 (includes others),KLRB1,Klrb1f,KLRC1,KLRD1,Klrk1,LAT2,Ly6a (includes others),LYN,MYO1F,NCR1,PREX1,SCIMP,Serpina3g (includes others),SLAMF7,STAT4,TBX21,TNF,TNFSF10,XCL1
SPI1		transcription regulator	Activated	4.83179	bias	3.58E-30	396 (18)	ACTB,C1QC,CCR7,CD180,CD72,CHI3L1,CIITA,CSF2RA,CSF2RB,CSF3R,CTSS,Cxcl9,CYBB,FCER1A,FCER1G,FCGR2B,FES,FUT7,GFI1,HK3,IFIT1B,IL10,IL1B,IL1RN,IL2RA,IL7R,IRF9,ISG15,ITGA4,ITGA5,ITGAM,ITGB2,KLK1,Klra4 (includes others),LILRB3,NCF1,NCF2,NCF4,NOS2,P2RY10,PML,PSMB10,PSMB8,PSMB9,PTPN6,PTPRC,RUNX3,TFEC,TLR2,TNF,TNFRSF14,VAV1
MAVS		other	Activated	4.82727	bias	7.38E-24	328 (15)	ADAR,CCL5,CMPK2,CXCL10,DHX58,IFIT1,IFIT1B,IFIT2,IFIT3,IFITM3,IL6,IRF7,ISG15,ISG20,OAS1,OAS2,OASL,Oasl2,PARP12,RSAD2,SOCS1,SOCS3,STAT1,STAT2,TLR7,TNF,UBE2L6
TLR2	1.876	transmembrane receptor	Activated	4.79675	bias	1.50E-25	334 (20)	ARG1,ATF3,CCL2,Ccl2,CCL3L3,CCL5,CCR1,CCR5,CD40,CD69,CD86,Chil3/Chil4,CSF2RA,CXCL10,Cxcl9,CYBB,EBI3,FASLG,FPR2,HLA-DQA1,HLA-DRB5,ICAM1,IL10,IL15,IL1B,IL1RN,IL2RA,IL6,IRF1,ITGA4,ITGB7,MX1,MYD88,NOS2,SELE,SELP,SOCS1,SOCS3,TBX21,TLR2,TNF,TNFAIP8L2
NFKBIA		transcription regulator	Activated	4.78468	bias	6.07E-29	350 (16)	ANKRD1,BCL2A1,BCL3,BIRC3,CASP4,CASP8,CCL11,CCL2,Ccl2,CCL3L3,CCL5,Ccl7,Ccl9,CCR1,CCRN4L,CD40,CD69,CD86,CDC6,CH25H,CTSB,CTSZ,CXCL10,CXCL6,CXCR4,CYBA,CYP7B1,ERAP1,FASLG,FGFR4,FSCN1,GBP2,GCH1,GRN,GZMB,HLA-A,HMGA1,HPSE,ICAM1,IFI16,IFIT1B,IL10,IL15,IL1B,IL1RN,IL2RA,IL6,IL7R,IRF1,IRG1,ISG15,KCNN4,LY6E,MYOD1,NFKB2,NFKBIE,NOD2,NOS2,PIM1,PTX3,RELB,RGS16,SELE,Slfn2,SOCS3,TIMP1,TLR2,TNF,TNFAIP2,TNFAIP3,TNFRS…
CSF1		cytokine	Activated	4.73699	bias	5.39E-24	400 (20)	ARG1,CCL2,Ccl2,CCL5,Ccl7,CCNE1,CCR5,CXCL6,DOK2,DUSP5,FASLG,FCER1G,FCGR2A,FCGR3A/FCGR3B,GAB3,GRAP2,Iigp1,IL10,IL10RA,IL18BP,IL1B,IL1RL1,IL6,IRF5,IRF7,ITGA4,ITGA5,ITGAM,MSR1,NFKB2,PTPRC,PTPRJ,SIGLEC1,SIRPB1,STAT1,TLR1,TLR2,TLR6,TLR9,TNF,TNFRSF11A,TNFRSF1B,VCAM1
IL17A		cytokine	Activated	4.72774	bias	7.74E-16	338 (12)	ACTB,BCL2A1,CCL11,CCL2,Ccl2,CCL4,CCL5,Ccl7,CD274,CD40,COTL1,CXCL6,CYP7B1,ENTPD1,GBP2,ICAM1,IFIT1B,IL10,IL1B,IL1RN,IL6,ISG15,NFKBIZ,NOS2,RGS16,SELE,SELP,SOCS3,Tgtp1/Tgtp2,TIMP1,TLR2,TLR3,TNF,TNFAIP3,TNFRSF11A,VCAM1
IFNA1/IFNA13		cytokine	Activated	4.66347	bias	9.67E-23	373 (16)	CD40,CD69,CD86,CXCL10,DHX58,EIF2AK2,IFIH1,IFIT1,IFIT2,IL1B,IRF1,ISG15,MX1,OAS1,OAS2,PLSCR1,RSAD2,SIGLEC1,SOCS1,STAT1,STAT2,STAT4,Tgtp1/Tgtp2,TLR3,UBE2L6,ZBP1
ETS1	1.103	transcription regulator	Activated	4.64788	bias	5.14E-21	379 (22)	APOC2,ARHGDIB,CASP1,CCL2,Ccl2,CCL5,CCNE1,CD27,CDKN2A,ETS1,FASLG,FCGR2A,FGFR4,GZMA,HCST,HGF,HPSE,ICAM1,IL10,IL2RA,IL2RB,ITGB2,ITK,Klra4 (includes others),Klre1,Klrk1,LAIR1,LCK,LTB,MSR1,NCF1,NCR1,PML,PRF1,RUNX3,SELL,SERPINE1,SLAMF6,TBX21,TBXAS1,TNF,TNFSF14,WAS,ZAP70
CD44		enzyme	Activated	4.6389	bias	5.15E-19	371 (16)	ACTB,ADAM8,BIRC3,CCL19,Ccl2,CCL4,CCL5,Ccl7,CCR5,CCR7,CD69,CD8A,CD8B,CLEC7A,CXCL6,Cxcl9,CXCR3,FASLG,IL10,IL1B,IL1RN,IL2RA,IL6,ITGA4,ITGA5,ITGAX,LGALS1,Ly6a (includes others),NFKB2,SELL,TCIRG1,TLR8,TNF,TNFRSF11A,VCAM1,XCL1,ZYX
NOD2	1.135	other	Activated	4.61833	bias	2.18E-18	307 (18)	ARL5C,BCL2A1,CCL2,CCL5,CD40,CLEC4E,CXCL10,GPR84,ICAM1,IL10,IL1B,IL6,IRG1,ITGAM,MARCKSL1,MCOLN2,MEFV,NFKB2,NOS2,SOCS3,TNF,TNFAIP3,TNFRSF9,TRAF1
IFNAR1		transmembrane receptor	Activated	4.60998	bias	4.86E-47	410 (17)	Apol9a/Apol9b,ARG1,ATF3,B2M,CCL3L3,CCL4,CCL5,Ccl9,CD40,CH25H,CIITA,CLEC4D,CLEC4E,CMPK2,CXCL10,Cxcl3,CXCL6,Cxcl9,EIF2AK2,HLA-A,IFI16,IFI44,IFIH1,IFIT1B,IFIT2,IFIT3,IL15,IL1B,IL6,IRF7,IRG1,ISG15,Ly6a (includes others),Ms4a4b (includes others),Mx1/Mx2,NOS2,OAS1,OAS2,OASL,Oasl2,PARP12,RSAD2,RTP4,SOCS1,SOCS3,Sp100,STAT1,TAPBPL,TLR2,TLR3,TNF,TNFAIP2,TNFAIP3,USP18
LEP		growth factor	Activated	4.59406	bias	3.66E-09	295 (17)	ADAM8,APAF1,BAK1,BCL2A1,CASP3,CASP7,CCL2,Ccl2,CCL3L3,CCL5,CD40,Chil3/Chil4,CXCL10,CYBA,CYBB,FASLG,ICAM1,IL10,IL1B,IL1RN,IL6,Irgm1,ITGAM,LIPA,MYOD1,MYOG,NAMPT,NCF1,NCF2,NOS2,NTS,PRF1,SELE,SELP,SERPINE1,SOCS3,Tgtp1/Tgtp2,TIMP1,TNF,TNFSF10,UCP2,VCAM1,ZFP36
IKBKG		kinase	Activated	4.58207	bias	2.46E-21	326 (13)	Ccl2,CCL5,Ccl8,Ccl9,CCR1,CCRN4L,CH25H,CTSB,CTSZ,CXCL6,CYP7B1,GBP2,GCH1,GRN,HLA-A,ICAM1,IFI16,IFIT1B,IL1B,IL1RN,IL6,IRF7,IRG1,ISG15,NFKB2,PTX3,RELB,RGS16,Slfn2,SOCS3,TNF,TNFAIP2,TNFAIP3,TNFRSF1B,TNFSF10
PARP1		enzyme	Activated	4.51346	bias	1.64E-16	375 (16)	CASP4,Ccl2,CCL5,CD274,CXCL10,Cxcl9,GBP2,GBP6,GBP7,ICAM1,Igtp,Iigp1,IL10,IL18BP,IL1B,IL6,IRGM,ITGAL,NOS2,SELP,SH3BP2,SOCS1,STAT1,Tgtp1/Tgtp2,TNF,VCAM1
RIPK2		kinase	Activated	4.49115	bias	7.42E-14	320 (16)	ARL5C,Ccl2,CCL5,CD40,CD69,CD86,CLEC4E,CXCL10,GPR84,ICAM1,IL6,IRG1,MARCKSL1,MCOLN2,MEFV,NFKB2,NOS2,SELE,TNF,TRAF1,VCAM1
PI3K (complex)		complex	Activated	4.48452	bias	1.15E-18	304 (18)	APLN,ATF3,BAK1,BIRC3,CASP3,CCL2,Ccl2,CCL4,CCNE1,CCR1,CD2,CD274,CD86,CXCL10,CXCR4,CYBB,DAPP1,ETS1,FASLG,FUT7,ICAM1,IFIT1,IL10,IL1B,IL1RN,IL6,IL7R,IRF2,ITGAM,ITGB2,KDR,MTHFD2,MYOD1,NFKB2,NOS2,PIM1,RGS2,SAMHD1,SELL,SERPINE1,SOCS3,TGM2,TNF,TNFRSF11A,TNFSF10,TRIM25,TUBB3,VCAM1
IL12 (family)		group	Activated	4.45964	bias	3.54E-21	424 (18)	BCL3,CCL4,CCL5,CCR5,CD274,CD69,CD86,FASLG,FCGR3A/FCGR3B,ICOS,IDO1,IL10,IL18R1,IL18RAP,IL27RA,IL2RA,IL6,IRF1,IRF8,NCR1,NFKBIZ,PDCD1,PIM1,PRF1,SAMHD1,STAT1,STAT4,TBX21,TNF,TNFSF10
IL7		cytokine	Activated	4.44838	bias	4.55E-27	384 (17)	BTLA,CASP3,CCL2,Ccl2,CCL4,CD2,CD247,CD274,CD3D,CD3G,CD69,CD86,CD8A,CD8B,CXCR4,DUSP5,GFI1,HAVCR2,HCST,ICOS,IL18R1,IL18RAP,IL2RA,IL6,IL7R,ITGB7,JAK3,LTB,Ly6a (includes others),LYN,MX1,PDCD1,PIM1,RGS16,SELL,SOCS1,SOCS3,SYK,TNF,TNFRSF9,TNFSF10,UPP1
PAF1		other	Activated	4.3589	bias	2.08E-15		BIRC3,CCL3L3,CCL5,HELZ2,IDO1,IFI44,IFIT3,IFITM3,ISG15,ISG20,NFKBIZ,OAS2,OASL,PLAUR,PNP,SERPINE1,ZC3HAV1,ZFP36,ZNFX1
BAX		transporter	Activated	4.33777	bias	7.05E-17	351 (21)	APAF1,BAK1,CASP3,CCL5,CTSB,CTSH,CTSS,CXCL10,H2-T10,HLA-A,Ifitm1,IFNAR2,IL15,IL6,IRF7,Mx1/Mx2,Oas1b,TGM2,TIMP1,TNF,TRIM6-TRIM34
CEBPB		transcription regulator	Activated	4.2906	bias	1.49E-14	397 (20)	ALOX5AP,APLN,ARG1,BCL2A1,CCL2,Ccl2,CCL3L3,CCL4,CCL5,CCNE1,CCR5,CDC6,CLEC4E,CSF3R,CTSC,CXCR4,F7,FTL,GLIPR2,HDC,HGF,HLA-A,HMGA1,ICAM1,IFITM3,IL10,IL18BP,IL1B,IL1RN,IL3RA,IL6,IRF9,ITGAL,LCP2,LYN,MSR1,NFKBID,NFKBIZ,NOS2,PLAUR,PTGER4,RAC2,SERPINE1,SOCS3,TLR8,TLR9,TNF,TUBB3,UPP1,XDH,ZYX
Hbb-b2		other	Activated	4.24264	bias	5.03E-17	267 (7)	C1QA,Ccl2,Ccl7,CCR5,CD74,CIITA,CLEC7A,CXCL10,Cxcl9,CXCR3,CXCR6,FTL,IL10RA,IL1B,IL2RB,IL2RG,LTB,LY86,TLR2
ARHGAP21		other	Activated	4.24264	bias	5.44E-15		ARID5A,BATF,CXCL10,Cxcl9,FGL2,HDC,IFIT3,Iigp1,IL15,IRF1,IRGM,ISG20,Mx1/Mx2,NFKBIZ,NMI,TLR3,TNF,TRIM21
TNFSF12		cytokine	Activated	4.23983	bias	7.03E-24	271 (17)	ADAM8,ANKRD2,BST1,CCL11,CCL19,CCL2,Ccl2,CCL3L3,CCL5,Ccl7,Ccl9,CCR1,CCR5,CLEC4D,CLEC4E,CSF2RA,CXCL10,CXCL6,ICAM1,IL1B,IL6,ITGAM,MAP3K14,MYOD1,MYOG,NCF4,NFKB2,PTX3,SELE,TIMP1,TNF,VCAM1
Tnf (family)		group	Activated	4.22683	bias	2.65E-15	286 (16)	ATF3,BIRC3,C3AR1,CCL2,Ccl2,CCL4,CCL5,CCR5,CD4,CD40,CD72,CD86,CXCL10,EIF2AK2,GFI1,GJA5,ICAM1,IL1B,IL6,NOS2,SAA1,SELE,SELL,SERPINE1,SOCS3,TLR2,TNFAIP3,TNFRSF1B,TNFRSF9,TRAF1,VCAM1
IFN type 1		group	Activated	4.20383	bias	6.82E-24	348 (17)	Bst2,Ccl2,CCL5,CD69,CXCL10,Cxcl9,DHX58,EIF2AK2,IDO1,IFI16,IFIH1,IFIT1,IFIT1B,IFIT2,IL6,IRF1,ISG15,Mx1/Mx2,OASL,PML,STAT1,STAT2,TNFSF10,UBA7,XDH
JAK2		kinase	Activated	4.17027	bias	4.62E-20	342 (21)	ACTB,CASP1,CCL2,Ccl2,CCL5,Ccl9,CDKN2A,CST7,CXCL10,CYBB,F10,FCGR2B,GBP2,ICAM1,Ifitm1,IL1B,IL6,IRF1,LAT2,LY6E,LYN,NKG7,NOS2,OSM,PFN1,PSMB9,SELP,SLAMF9,SLC11A1,SOCS3,STAT1,TAP1,TNF
IL13		cytokine	Activated	4.15671	bias	5.99E-34	420 (14)	ADA,ADORA2A,ALOX5AP,ARG1,ATF3,BATF,BCL2A1,BCL3,C3AR1,CASP1,CASP3,CASP7,CASP8,CCL11,CCL2,Ccl2,CCL3L3,CCL4,CCL5,Ccl6,Ccl7,Ccl8,CCR5,CD247,CD4,CD40,CD48,CD72,CD86,CHI3L1,Chil3/Chil4,CLEC4E,CLEC7A,CTSB,CTSC,CTSH,CTSS,CXCL6,CXCR4,CYBB,FCGR1A,FCGR2A,FCGR2B,FGD2,FPR2,HDC,HPSE,ICAM1,IDO1,IFNGR2,IL10,IL1B,IL1RL1,IL1RN,IL3RA,IL6,LILRB3,LIPA,NOS2,SAMSN1,SELP,SERPINE1,SLA,SLC7A7,SLC8A1,SOCS1,SOCS3,ST8SIA4,TF…
CD14		transmembrane receptor	Activated	4.12707	bias	1.13E-16	283 (15)	BCL2A1,CCL2,Ccl2,CCL3L3,CCL4,CCL5,CXCL10,IFIT1,IL10,IL10RA,IL1B,IL2RA,IL6,NOS2,SELE,SELP,SOCS1,SOCS3,TLR2,TNF,TNFAIP3
TYROBP	2.223	transmembrane receptor	Activated	4.07488	bias	2.03E-18	321 (17)	CCL2,CCR7,CD40,CD69,CD86,FCGR2B,ICAM1,IDO1,IL6,ITGA5,ITGAM,ITGAX,Klra4 (includes others),KLRD1,NCKAP1L,NOD2,SIRPB1,TCIRG1,TNF,TYROBP
MAP3K7		kinase		4.06744	bias	3.23E-19	365 (14)	BIRC3,Ccl2,CCL5,Ccl7,CCR7,CFB,CH25H,CXCL10,CXCL6,GBP1,GBP2,GCH1,IFIH1,IFIT1,IL1B,IL6,IRF1,IRF7,RGS2,SAA1,SELE,SERPINE1,TNF,TNFSF10,XAF1
TNFSF10	3.062	cytokine	Activated	4.05939		1.06E-17	381 (18)	BAK1,BIRC3,CASP3,CASP8,CD69,CXCR4,EIF2AK2,FASLG,HLA-A,HLA-F,IFI16,IFIT1,IL1RN,IL2RA,IL6,IRF9,ISG15,ITGAM,PSME2,SELE,STAT1,TIMP1,TNF,TNFAIP2,TNFAIP3,TNFSF10,TRAF1
JAK1		kinase	Activated	4.01277	bias	2.03E-18	342 (17)	CCL2,CCL3L3,CD40,EIF2AK2,HLA-A,HLA-F,ICAM1,IFIT2,IL1B,IL4R,IRF1,IRF9,MX1,MYOD1,PSMB9,SOCS3,STAT1,TAP1,TNF,USP18
TNK1		kinase	Activated	3.85039	bias	5.37E-20	294 (11)	IFI16,IFIH1,IFIT1B,IFIT2,Ifitm1,IL10,IL6,IRF7,ISG20,NOS2,Oas1b,OAS2,TLR8,TLR9,TNFSF10
IL12B		cytokine	Activated	3.80001	bias	1.02E-17	349 (18)	Ccl2,CCL5,CCR5,CD86,CXCL10,DUSP5,GZMB,ICAM1,IL10,IL1B,INPP5D,IRF9,NOS2,PIK3AP1,SELPLG,SOCS1,SOCS3,STAT1,STAT2,STAT4,TNF,VCAM1
C5		cytokine	Activated	3.76056	bias	4.96E-18	265 (14)	ATF3,C5AR1,CCL11,CCL2,Ccl2,CCL3L3,CCL4,CCL5,CCNE1,CYBB,FASLG,FCGR1A,FCGR2A,FCGR2B,HGF,ICAM1,IFNGR2,IL10,IL18R1,IL1B,IL6,ITGAM,ITGB2,SELE,SERPINE1,TNF,TNFAIP2,TNFAIP3,VCAM1,ZFP36
TMEM173	2.641	other	Activated	3.72857	bias	2.83E-12	321 (14)	C15orf48,CCL5,Cxcl9,GBP5,HDC,IFI16,IL1B,IL6,NOS2,OASL,RGS16,Serpina3g (includes others),TNF,UPP1
PARP9	2.802	enzyme	Activated	3.71868	bias	6.95E-18	228 (7)	CD74,HLA-DQA1,HLA-DQB1,HLA-E,IFI44,IFIT1,IFIT2,IFIT3,IRF2,IRF7,ISG15,OAS2,SP110,STAT1
TRAF6		enzyme	Activated	3.58558	bias	6.88E-09	296 (16)	BIRC3,CCL2,CD274,ICAM1,IL10,IL15,IL1B,IL6,IRF5,NOS2,RELB,SELE,TNF,TNFAIP3
TRADD		other	Activated	3.56845	bias	6.71E-12	305 (16)	BCL2A1,CCL2,ICAM1,IL18R1,IL6,IRF1,RND1,TNF,TNFAIP2,TNFAIP3,TRAF1,UBD,VCAM1
STAT2	2.938	transcription regulator	Activated	3.55823	bias	3.68E-28	340 (15)	CCL19,Ccl2,CCL5,CIITA,CXCL10,GBP1,IFI35,IFIT1,IFIT1B,IFIT2,IFIT3,IL10,IL6,IRF1,IRF5,IRF7,IRF9,ISG15,MX1,OAS1,OAS2,PSMB8,RSAD2,SOCS1,TNF,TNFSF10,USP18,WARS
CD40	2.891	transmembrane receptor	Activated	3.55411	bias	6.49E-35	366 (15)	BCL2A1,BIRC3,CCL2,Ccl2,CCL4,CCL5,CD27,CD38,CD40,CD69,CD86,CD8A,CTLA4,CXCL10,Cxcl9,DAPP1,FASLG,FCGR2B,HLA-DQB1,HSH2D,ICAM1,IL10,IL10RA,IL15,IL1B,IL1RN,IL2RA,IL2RB,IL4R,IL6,IRF1,ITGAL,ITGAM,ITGB2,Ly6a (includes others),MAP3K14,NFKB2,NOS2,PIM1,PSMB10,PSMB9,PTGER2,SAMSN1,SELE,SELL,SERPINE1,SLAMF7,TAP1,TAP2,TAPBP,TBX21,TLR2,TLR9,TNF,TNFAIP3,TNFRSF9,TNFSF10,TRAF1,VCAM1
IL4		cytokine	Activated	3.5341	bias	1.59E-80	423 (15)	ACP2,ALOX5AP,ARG1,B4GALNT1,BCL3,C5AR1,CASP3,CCL11,CCL2,Ccl2,CCL3L3,CCL4,CCL5,Ccl6,Ccl7,CCNE1,CCR5,CCR7,CCRN4L,CD2,CD300A,CD38,CD40,CD5,CD6,CD69,CD86,CD8A,Chil3/Chil4,CIITA,CLEC4C,CLEC7A,CRLF2,CSF2RB,CSF3R,CST7,CTSC,CXCL10,CXCL16,CXCL6,Cxcl9,CXCR3,CXCR4,CYSLTR2,FASLG,FCER1G,FCGR2A,FCGR2B,FCGR3A/FCGR3B,FPR2,FUT7,GBP2,GBP7,GFI1,GIMAP1-GIMAP5,GLIPR2,GZMA,HCK,HCLS1,HGF,HLA-DMA,HSH2D,ICAM1,ICOS,IDO1,IF…
TLR5		transmembrane receptor	Activated	3.5271	bias	1.82E-12	333 (17)	ATF3,CCL11,Ccl2,CCL4,CCL5,CD40,CD86,ICAM1,IL10,IL15,IL1B,IL6,MYD88,TLR7,TNF
FADD		other	Activated	3.45232	bias	1.71E-25	335 (16)	ARID5A,BIRC3,CASP7,Ccl2,CCNE1,CXCL10,CXCR4,DHX58,EIF2AK2,FASLG,ICAM1,IFIH1,IFIT1B,IFIT2,IL6,IRF5,IRF7,LY6E,Mx1/Mx2,MYOG,PARP11,PIM1,PSMB8,RNF114,SOCS1,Sp100,ST8SIA4,STAT1,STAT2,TLR3,TNF,TNFAIP3,TRAFD1
TRPV4		ion channel	Activated	3.42997	bias	1.44E-11	313 (14)	Ccl2,CCL3L3,CCL5,Ccl7,Ccl8,CXCL10,CXCL6,IL6,SOCS3,TIMP1,TLR2,VCAM1
FZD9		g-protein coupled receptor	Activated	3.42929	bias	4.22E-14	204 (10)	Ccl2,CCL5,CXCL10,CXCL6,IFI16,Ifi27l2a/Ifi27l2b,IFI44,IFIT1B,IRF7,ISG15,Oasl2,STAT1
NOS2	5.241	enzyme	Activated	3.36429		5.34E-21	333 (18)	ACTC1,BCL2A1,CASP3,CCL2,Ccl2,CCL3L3,CCL4,Ccl7,Ccl9,CD3E,CD53,CD86,CHI3L1,Chil3/Chil4,CLEC4D,CSF3R,CTSC,Cxcl9,FASLG,H2-T10,IFIT1B,IFIT3,IL10,IL1B,IL1RN,IL6,ISG15,KDR,LCK,LGALS3BP,LILRB4,NOS2,PLSCR1,PRF1,Slfn2,Tgtp1/Tgtp2,TIMP1,TNF,TNFSF10,TNNI3,TOR3A,TYROBP
IFNA4		cytokine	Activated	3.35146	bias	1.44E-11	370 (16)	CD69,CXCL10,IFIH1,IFIT1,IFIT2,ISG15,MX1,Mx1/Mx2,OASL,STAT4,USP18,ZBP1
EBI3	1.851	cytokine	Activated	3.32265	bias	7.81E-16	411 (19)	B2M,CD86,CIITA,CTSE,GBP2,HLA-A,HLA-DMA,HLA-DMB,HLA-DQA1,ICAM1,IL10,IRF1,MX1,PIM1,STAT1,STAT2,TAP1,TBX21,TNFSF10
IL17RA		transmembrane receptor	Activated	3.29484	bias	6.12E-09	302 (18)	CCL11,Ccl2,CCR1,CSF3R,CXCL6,IL1B,IL6,SELE,SELP,TIMP1,TNF
TBK1		kinase	Activated	3.27486	bias	3.07E-23	396 (16)	CCL3L3,CCL4,CCL5,CD40,CMPK2,CXCL10,Cxcl9,CXCR3,FGL2,HDC,ICAM1,IFIT1,IFIT1B,IFIT2,Iigp1,IL10,IL15,IL1B,IL6,IRF7,IRG1,ISG15,ISG20,Mx1/Mx2,NFKBIZ,NMI,RSAD2,SELE,TLR2,TLR3,TNF
MOG		other	Activated	3.25624	bias	5.52E-18	368 (15)	C5AR1,Ccl2,CCL3L3,CCL5,Ccl7,CCR1,CCR5,CD274,CD40,CD86,CIITA,CXCL10,Cxcl9,ICAM1,IL10,IL6,ITGAL,NOS2,PDCD1,TNF,VCAM1
IL21		cytokine	Activated	3.23745	bias	8.91E-32	430 (20)	ARG1,BATF,CCL11,CCL5,CCR7,CD2,CD244,CD27,CD28,CD38,CD69,CD86,CXCL10,FCGR2B,GZMA,GZMB,HCST,HSH2D,IDO1,IL10,IL18R1,IL18RAP,IL21R,IL2RA,IL2RB,IL6,IL7R,Klra4 (includes others),KLRB1,KLRC1,KLRD1,MYD88,NCR1,NOS2,PDCD1,PRF1,PTPRC,SELL,SOCS1,SOCS3,STAT4,TBX21,TNF,TYROBP
Hbb-b1		transporter	Activated	3.2315	bias	9.86E-19	340 (13)	C1QA,Ccl2,Ccl7,CCR5,CD74,CIITA,CLEC7A,CXCL10,Cxcl9,CXCR3,CXCR6,FTL,ICAM1,IL10RA,IL1B,IL2RB,IL2RG,LTB,LY86,TLR2,VCAM1
IL12A		cytokine	Activated	3.20103	bias	1.24E-21	378 (21)	CASP3,CCL5,CD86,CXCL10,CXCR6,EBI3,FASLG,FUT7,ICAM1,ICOS,IL10,IL12RB1,IL1B,IL6,IRF9,NOS2,PRF1,SELPLG,SOCS1,SOCS3,STAT1,STAT2,STAT4,TNF,VCAM1
IRF8	3.229	transcription regulator	Activated	3.16741	bias	3.15E-25	412 (16)	ATF3,B2M,CASP3,CCL5,Ccl9,CCR7,CD4,CD40,CD86,CFB,CIITA,CSF3R,CTSS,CXCL16,Cxcl9,CYBB,GBP1,ICAM1,IDO1,IFIT2,IL15,IL1B,IL6,IRF5,IRF8,ISG15,ITGAM,MSR1,NOS2,OAS1,Pmaip1,PML,STAT1,TLR3,TLR9,TNF,TRIM21,TYROBP
TGFB1		growth factor	Activated	3.029	bias	4.15E-45	440 (19)	2610318N02Rik,ABCG1,ACTC1,ACVRL1,ADAMTS4,AIM2,ALOX5AP,ANKRD1,APLN,APOC2,ARG1,B2M,BCL3,C1QA,C1QB,C1QC,C1S,C3AR1,C5AR1,CASP1,CASP3,CASP4,CASP8,CCL11,CCL2,Ccl2,CCL3L3,CCL4,CCL5,Ccl7,Ccl8,CCNE1,CCR1,CCR5,CCR7,CCRL2,CD28,CD300A,CD4,CD40,CD69,CD72,CD86,CDKN2A,CFL1,CHI3L1,CIITA,Clec2d (includes others),CLIC4,COTL1,CTLA4,CTSB,CTSC,CTSH,CTSS,CXCL10,CXCR3,CXCR4,CXCR6,CYBA,CYBB,DAXX,DOCK2,DOK1,DTX4,ELF4,ENG…
ERK1/2		group	Activated	2.98518	bias	1.23E-17	339 (16)	ANKRD2,APLN,ATP1A3,B2M,BCL2A1,BIRC3,CCL11,CCL2,Ccl2,CCL3L3,CCL4,CCL5,CCR7,CD40,CD86,CTSB,CXCL10,CXCL6,CXCR4,CYBB,ETS1,HLA-A,HMGA1,ICAM1,IFIT1,IL10,IL1B,IL2RA,IL6,MYOG,NAMPT,NOS2,PLAUR,PSMB10,PSMB8,PSMB9,PTGER2,PTGER4,SERPINE1,SOCS3,TAP1,TAP2,TAPBP,TIMP1,TNF,VCAM1
BCR (complex)		complex	Activated	2.93371	bias	3.44E-20	315 (16)	BCL2A1,BTK,CASP3,CCL4,CCR7,CD27,CD300A,CD5,CD69,CD7,CD86,CDKN2A,CXCR4,GBP2,GZMB,HLA-DMA,HSH2D,IL10,IL12RB1,IL2RA,IL2RB,ITGA4,KCNN4,LAIR1,LCK,MS4A6A,PIM1,POU2F2,PTAFR,PTPN22,SELL,SLAMF7,TLR9
Fibrinogen		complex	Activated	2.87706	bias	1.03E-15	281 (13)	BCL3,CCL2,Ccl2,CCL3L3,CCL4,CD40,FCGR3A/FCGR3B,ICAM1,IL1B,IL6,ITGAM,SELP,TLR2,TNF
IL6R		transmembrane receptor	Activated	2.72637	bias	7.15E-09	354 (19)	CCL2,CCL5,CXCL10,CXCL6,ICAM1,IL10,IL1B,IL6,IRF1,NAMPT,SAA1,SOCS3,TIMP1,TNF,TNFRSF11A,VCAM1
MAPK9		kinase	Activated	2.72069	bias	2.05E-12	380 (18)	BAK1,BIRC3,CCL2,Ccl2,Ccl7,CDKN2A,FASLG,FGL2,HDC,HMGA1,IFI16,Iigp1,IL1B,IL6,IRF9,ISG20,LGALS3BP,MARCKSL1,NMI,NOS2,PARP14,PTX3,SELPLG,TLR3,TNF,TNFAIP3,ZFP36,ZYX
VIPR1		g-protein coupled receptor	Activated	2.71822	bias	1.29E-14	282 (16)	Ccl2,CCL3L3,CCL4,CCL5,CD40,CD86,CXCL10,FASLG,IL10,IRF1,NOS2,TNF
TNFRSF1A		transmembrane receptor	Activated	2.71558	bias	8.05E-16	345 (18)	BIRC3,CASP3,CCL19,CCL2,Ccl2,CCL3L3,CCL4,CCL5,CD38,CXCL10,ICAM1,IL15,IL1B,IL6,ITGAM,KDR,LGALS9B,MYOD1,NOS2,SAA1,SELE,SELL,SELP,SERPINE1,SOCS3,TBX21,TNF,TRAF1,VCAM1
KRT17		other	Activated	2.67261	bias	9.38E-13		CCL11,CCL3L3,CCL4,CCL5,CCR1,CCR5,CLEC7A,CXCL10,CXCL6,IL10,IL15,IL1B,IL6,TNF
LDL		complex	Activated	2.65289	bias	2.83E-20	339 (20)	ABCG1,APOBEC3B,ATF3,BCL2A1,CASP1,CASP8,CCL2,Ccl2,CCL4,CCL5,CCR7,CD40,CDKN2A,CXCL10,CXCL6,CYBB,DUSP2,FCGR1A,FCGR2B,GJA5,ICAM1,IDO1,IFIT2,IL10RA,IL1B,IL1RN,IL6,IRF2,IRF7,MSR1,MX1,NAMPT,NCF1,NOS2,NPC2,PTAFR,SELE,SELP,SERPINE1,SIGLEC1,SOCS1,SOCS3,TNF,TNFAIP3,TNFAIP8L2,VCAM1
CCR2		g-protein coupled receptor	Activated	2.53262	bias	3.23E-19	360 (21)	ARG1,CCL11,CCL2,Ccl2,CCL3L3,CCL4,CCL5,Ccl6,Ccl7,Ccl8,Ccl9,CCR1,CCR5,CD40,CD86,Chil3/Chil4,CXCL10,CXCL6,Cxcl9,IL10,IL1B,IL6,ITGAL,TIMP1,TNF
TP53		transcription regulator	Activated	2.50475		1.72E-18	404 (16)	ACP2,ACTB,ADA,ADAM8,APAF1,APOBEC1,ARPC1B,ATF3,BAK1,BCL2A1,BCL3,BIRC3,C1QC,CASP1,CASP3,CASP4,CASP8,CCL2,Ccl2,CCL3L3,CCL4,CCNE1,CD247,CD47,CDC6,CDKN2A,CERS6,CKB,CLIC4,CSF2RA,CSF3R,CTSB,CTSH,CTSW,DCK,DOK1,DUSP2,DUSP5,ELF4,ENG,FASLG,FKBP1B,GBP1,GLIPR1,GLRX,HDC,HLA-DQA1,ICAM1,IER5,IFI16,IFI30,IFI35,IL10,IL10RA,IL12RB1,IL1B,IL21R,IL27RA,IL2RA,IL4R,IL6,IRF5,IRF7,IRF8,IRF9,ISG15,ITGB7,KCNN4,Ly6a (include…
CSF3		cytokine	Activated	2.32093	bias	1.36E-30	364 (16)	ARG1,BATF,BIRC3,C3AR1,Ccl2,CCL3L3,CCL5,CCNE1,CCR7,CD300LD,CD300LF,CSF3R,CTLA4,CXCR4,CYBB,ENTPD1,ETS1,FCGR1A,FPR1,GFI1,GZMB,HDC,HGF,HLA-DQA1,ICAM1,IL10,IL1RN,IL6,ITGAM,ITGB2,JAK3,KLRC1,LTB,Ly6a (includes others),PIM1,PLCB2,PLSCR1,RGS1,SELL,SOCS1,SOCS3,TLR2,TLR8,TNF,TNFAIP3,TNFRSF1B,TNFSF10,TNNI3,VCAM1
CREBBP		transcription regulator	Activated	2.04249	bias	5.28E-27	369 (20)	ADORA2A,ARID5A,B2M,CCL5,CCR5,CCR7,CD53,CDC6,CKB,CST7,CXCL10,Cxcl9,CXCR3,CXCR4,CYBB,EPSTI1,EVI2A,FASLG,FUT7,GFI1,GIMAP1-GIMAP5,GIMAP4,GIMAP7,GNG2,GPR18,HLA-G,IFIT1B,IL10,IL10RA,IL12RB1,IL18R1,IL18RAP,IL2RA,IL2RB,IL6,IL7R,INPP5D,IRF1,ISG15,ITGB7,KMO,LGALS3BP,MYO1F,MYOD1,NOS2,PITPNM1,PRF1,PSMB9,RGL1,RGS2,RSAD2,RTP4,SELE,SELP,SH2D1A,SLAMF6,SOCS3,STAT4,TAP2,TAPBP,TLR2,TNF,TNFAIP3,TNFAIP8L2,TNFSF10,TRA…
IRAK4		kinase		1.98287	bias	1.64E-16	359 (14)	ATF3,BIRC3,Ccl2,CCRN4L,CD86,CSRNP1,CXCL10,CXCL16,CXCL6,IFIT1B,IL10,IL1B,IL6,IRF1,IRF5,IRF7,NFKBIZ,NOS2,PLSCR1,RGS16,SOCS1,TNF,TNFAIP3,ZFP36
CAMP		other		1.94121	bias	3.97E-18	274 (19)	BAK1,C5AR1,CCL2,Ccl2,CCL4,CCL5,Ccl7,CCR7,CD86,CSF3R,CXCL10,CXCR4,FPR2,ICAM1,IL10,IL1B,IL6,ITGAM,ITGAX,ITGB2,MYD88,NOS2,TNF,TNFAIP2,TNFAIP3
MSR1	3.428	transmembrane receptor		1.93843		1.24E-11	345 (21)	CCL5,CXCL10,IFIT1,IFIT1B,IL10,IL1B,IL6,IRG1,ISG15,NOS2,TNF
TNFRSF1B	2.369	transmembrane receptor		1.87899	bias	1.87E-11	268 (18)	CASP3,CCR5,CD69,Chil3/Chil4,ICAM1,IL2RA,IL6,MSR1,MYOD1,NOS2,SAA1,SELL,SERPINE1,SOCS3,TIMP1,TNF,TNFAIP3,TNFRSF11A,TRAF1
TIRAP		other		1.80073	bias	3.86E-14	291 (15)	CCL4,CCL5,CD40,CD86,CXCL10,CXCL6,ICAM1,IL10,IL15,IL1B,IL6,IRF1,SELE,TNF,VCAM1
Ige		complex		1.79791	bias	4.85E-16	321 (21)	CCL11,CCL2,Ccl2,CCL3L3,CCL4,CCL5,Ccl9,CD86,DUSP2,FCER1A,FCER1G,FCGR1A,HAVCR2,HDC,IL10,IL1B,IL6,TLR7,TLR9,TNF
TREM1		transmembrane receptor		1.6818	bias	1.34E-16	357 (17)	ATF3,Ccl2,CCL5,CCR7,CCRL2,CD274,CD86,CFB,CXCL10,CXCR4,EBI3,GLA,IDO1,IFIT2,IL10,IL1B,IL1RL1,IL6,IRF1,ISG15,ITGAX,LRRC8C,LY9,MCOLN2,MYD88,NFKB2,NOD2,OASL,PLAC8,RGS1,RGS16,RRAD,SLAMF7,TIFA,TLR2,TNF,TNFSF14,TNIP3
Immunoglobulin		complex		1.30326		3.81E-38	421 (15)	BCL2A1,BCL3,C3AR1,CCL2,Ccl2,CCL4,CCL5,CCNE1,CD274,CD28,CD69,CD86,CIITA,CSF2RB,CTSZ,CXCL10,EIF2AK2,ENTPD1,FCER1G,FCGR1A,FCGR2A,FCGR3A/FCGR3B,FPR1,Gzmc,HCK,HK3,ICAM1,ICOS,IDO1,IFI30,IFNGR2,IL10,IL10RA,IL10RB,IL18R1,IL1B,IL2RA,IL4R,IL6,IRF1,ITGAX,KLRC1,KLRD1,LAG3,LILRB3,Ly6a (includes others),NAIP,NAMPT,NCF2,NLRP3,NOS2,PLSCR1,RGS2,RSAD2,SIRPA,SLC11A1,TBX21,TIMP1,TLR2,TLR7,TLR8,TNF,TNFRSF11A,UBD,VCAM1
IKBKE		kinase		1.25489	bias	3.01E-16	320 (16)	ADAR,BIRC3,Ccl2,CCL3L3,CCL5,CXCL10,CXCR3,HLA-A,IFI16,IFIH1,IFIT1,IFIT2,IFIT3,IL6,IRF7,IRG1,NOS2,RSAD2,STAT1,TNF
FAS		transmembrane receptor		0.818836		5.29E-32	323 (12)	ARRB2,BCL2A1,BIRC3,BTK,CASP3,CASP8,CCL2,Ccl2,CCL3L3,CCL4,CCL5,CCR1,CCRL2,CD300C,CD48,CD86,CD93,CXCL10,CXCL6,CXCR3,FASLG,FCGR2B,FES,FGL2,FPR1,FSCN1,GBP1,GBP2,GLIPR1,HLA-DQB1,HLA-F,ICAM1,IFIT1,IL10,IL10RA,IL18R1,IL1B,IL6,INPP5D,IRF1,LAT,LILRB4,LTB,LY75,NCR1,NFKBIE,NLRP1,NOS2,OSM,P2RX4,P2RY10,PIK3CD,PSTPIP1,PTGER2,PTGER4,PTX3,RGS14,RND1,RSAD2,SELP,SERPINB9,SERPINE1,SIT1,SYK,TLR2,TLR8,TNF,TNFAIP3,TNF…
STAT5A		transcription regulator		0.753371		5.75E-21	383 (17)	BCL2A1,BIRC3,CASP3,CASP4,CASP8,CCL3L3,CCNE1,CCR5,CXCR3,DUSP5,FASLG,FCER1G,GZMA,Gzmc,ICAM1,Ifitm1,IL2RA,IL2RB,IL6,IL7R,IRF1,Klra4 (includes others),KLRB1,KLRC1,Klre1,Klrk1,LTB,OSM,PIM1,PRF1,RAB19,SOCS1,SOCS3,TBX21,TNF,TNFRSF11A,TNFRSF14,TNFRSF9,TRAF1,WARS,ZFP36
IRF2	1.213	transcription regulator		0.345937		2.91E-29	297 (16)	B2M,CASP1,CIITA,CTSS,CXCL10,EIF2AK2,ERAP1,FASLG,GBP1,IFI35,Ifi47,IL1B,IL6,IRF1,IRF7,IRF8,ISG15,OAS1,PSMB10,PSMB8,PSMB9,PSME1,PSME2,SOCS1,TAP1,TAP2,TAPBP,TLR3,TNFSF10,TRIM21,USP18,VCAM1
ID2		transcription regulator		0.338062		2.72E-16	255 (15)	BATF,BCL3,CCNE1,CCR7,CDC6,CDKN2A,CXCR3,CXCR4,CXCR6,FCER1G,ICAM1,IFI16,IFNGR2,IKZF3,IL10,IL10RA,IL2RB,IL4R,IL7R,IRF5,IRF8,LTB,MAP3K14,PDCD1,PIK3R5,POU2F2,PTPN22,SELL,SH2D1A,SLAMF6,SOCS3,STAT4,TNFSF10,TNFSF14,TRAF1
IL10	4.911	cytokine		0.273252		7.12E-64	455 (17)	ALOX5AP,ARG1,BCL2A1,BCL3,BDKRB1,CASP3,CASP8,CCL11,CCL19,CCL2,Ccl2,CCL3L3,CCL4,CCL5,Ccl6,CCR1,CCR5,CCR7,CD2,CD274,CD28,CD40,CD72,CD86,CIITA,CLEC7A,CSF2RB,CTSB,CTSE,CTSS,CTSZ,CXCL10,CXCL6,Cxcl9,CXCR3,CXCR4,FASLG,FCER1G,FCGR1A,FCGR2A,FCGR2B,FCGR3A/FCGR3B,FPR1,GZMA,GZMB,HLA-G,ICAM1,IDO1,IFIT2,Igtp,Iigp1,IL10,IL10RA,IL1B,IL1RN,IL4R,IL6,IL7R,INPP5D,IRF1,ITGA4,ITGAL,ITGB7,KLRD1,LAG3,LGALS1,LILRB4,LY75,M…
IgG		complex		0.0869192	bias	1.87E-15	347 (17)	B2M,CCL11,CCL2,Ccl2,CCL4,CCL5,CD40,CD86,CTSC,FCGR1A,FCGR2A,FCGR2B,HLA-E,IFITM3,IL10,IL1B,IL1RN,IL2RA,IL6,ISG15,LGALS1,LY9,PDPN,PIM1,PLAUR,SERPINE1,SLAMF7,TAPBP,TLR7,TNF,TNFAIP3,VCAM1,ZFP36
IRF9	1.885	transcription regulator		0.0469841		2.58E-22	331 (14)	CCL19,CIITA,CXCL10,Cxcl9,GBP1,IFIT2,IFIT3,IRF1,IRF5,IRF7,IRF8,ISG15,MX1,OAS2,SOCS1,SOCS3,STAT1,STAT2,Tgtp1/Tgtp2,TNF,TNFSF10
ID3		transcription regulator		-0.0657241		3.45E-19	390 (23)	APAF1,BATF,BCL3,CCNE1,CCR7,CD72,CDC6,CDKN2A,CXCR3,CXCR4,CXCR6,FCER1G,ICAM1,IFI16,IFNGR2,IKZF3,IL10,IL10RA,IL2RB,IL4R,IL6,IL7R,IRF5,IRF8,LTB,MAP3K14,PDCD1,PIK3R5,PTPN22,SELE,SELL,SEMA7A,SH2D1A,SLAMF6,SOCS3,STAT4,TNFSF10,TNFSF14,TRAF1
KRAS		enzyme		-0.103584		1.31E-12	377 (17)	ACTR3,B2M,BAK1,Basp1,BIRC3,CASP1,CASP3,CD74,CDKN2A,CXCL10,DUSP5,EIF2AK2,FASLG,GRN,Hmga2,IFIT1,IFITM3,IGF2BP2,IL1B,IRF1,IRF2,IRF9,ISG15,LBH,LIPG,Ly6a (includes others),MX1,NOS2,OAS1,PDPN,PIM1,PTK2B,Pvr,RAB20,SIRPA,Slfn2,STAT1,STAT2,TAP1,TNF,TNFAIP2,Trim30a/Trim30d,UPP1,VMP1
S100A8		other		-0.211139		2.30E-14	303 (21)	ABCG1,ADAMTS4,CCL11,Ccl2,CD274,CTLA4,CXCL10,Cxcl9,ICAM1,IDO1,IL10,IL1B,IL6,ITGAM,NOS2,TNF,VCAM1
Map3k7		kinase	Activated	-0.44808	bias	3.83E-18	351 (17)	Ccl2,CCL3L3,CCL4,CCL5,Ccl7,CMPK2,CXCL10,Cxcl9,FGL2,IFIT2,IL10,IL15,IL1B,IL6,ISG15,ISG20,Mx1/Mx2,NFKBIZ,NOD2,RSAD2,TLR3,TNF,VCAM1
STAT6		transcription regulator		-0.929962	bias	7.01E-40	450 (15)	ARG1,BCL3,CCL11,CCL2,Ccl2,CCL3L3,CCL5,Ccl6,CCR5,CCR7,CD2,CD38,CD40,CD69,CST7,CTSB,CTSS,CTSW,CXCL10,FCER1G,FCGR1A,FCGR2A,FCGR3A/FCGR3B,GBP2,GFI1,H2-T22,HCK,IFI16,IFIT3,IFNAR2,IL10,IL10RA,IL15,IL18R1,IL1RN,IL4R,IL6,IRF1,IRF7,ISG15,ISG20,ITGB7,LGALS3BP,LILRB4,LPIN2,LTB,Ly6a (includes others),MOV10,Ms4a4b (includes others),Mx1/Mx2,OCSTAMP,PKIB,PLSCR1,SAMSN1,SELE,SELP,SERPINE1,SOCS1,STAT2,STAT4,SYK,TB…
SATB1		transcription regulator		-1.05838		9.43E-18	208 (7)	BCL2A1,BTLA,CD40,CD69,CD86,CD8A,CSF3R,CYBB,EBI3,EPSTI1,ETS1,EVI2A,FCGR1A,GLRX,GPR18,HELZ2,HLA-DMB,IL10RA,IL18RAP,IL2RA,IL4R,IL7R,IRF7,IRF8,LAG3,LAX1,LPIN2,PDCD1,RELB,RGS1,SELL,TNF,TNFRSF8,UBE2L6,WARS,XAF1
PROC		peptidase		-1.69687	bias	8.79E-10	301 (17)	BCL2A1,CCL2,Ccl2,ICAM1,IL1B,IL6,NFKB2,NOS2,SELE,SERPINE1,TLR2,TNF,TNFAIP3,VCAM1
HMOX1		enzyme		-1.72006		5.71E-12	269 (18)	ABCG1,ADORA2A,APAF1,CASP3,CCL2,Ccl2,CXCL10,ENG,HGF,ICAM1,IL10,IL1B,IL1RN,IL6,ITGAM,KDR,MSR1,NOS2,SELE,TNF,TNFSF14,VCAM1,ZFP36
CNOT7		transcription regulator		-1.98248	bias	2.78E-15	228 (7)	B2M,CMPK2,HERC6,IFI35,ISG15,LGALS3BP,OAS1,OAS2,PARP12,PLSCR1,PSMB8,SP110,STAT1,TAP1,TAP2,UBE2L6
VIP		other	Inhibited	-2.23107		1.20E-17	341 (17)	CASP8,CCL2,Ccl2,CCL3L3,CCL4,CCL5,CCNE1,CD274,CD40,CD86,CTLA4,CXCL10,FASLG,IL10,IL1B,IL1RL1,IL2RA,IL6,IRF1,LGALS1,NOS2,PDCD1,PRF1,TLR1,TLR6,TLR8,TLR9,TNF,TNFRSF11A
KLF2		transcription regulator	Inhibited	-2.28995	bias	1.15E-15	338 (18)	APLN,BCL3,CCL2,Ccl2,CCL4,CCL5,Ccl7,CCR5,CCR7,CD40,CD93,CXCR3,CXCR4,DOCK2,FGR,HPSE,IL1B,IL1RL1,IL6,ITGB7,KCNN4,KDR,PTPRJ,SELL,SERPINE1,STAT1,TIMP1,TNF,TNFRSF8,VAV1,VCAM1
CD28	2.580	transmembrane receptor	Inhibited	-2.74492	bias	6.36E-29	380 (17)	ACTR3,ARHGDIB,BCL2A1,CASP3,CASP8,CCL4,CCNE1,CCR5,CD247,CD27,CD274,CD3E,CD69,CD86,CH25H,CRLF2,CTLA4,CXCR3,CXCR4,CXCR6,EBI3,FASLG,FCER1G,FYB,GBP1,GBP2,GZMA,GZMB,HAVCR2,HLA-DQB1,ICOS,IL10,IL10RA,IL10RB,IL12RB1,IL18R1,IL1B,IL21R,IL27RA,IL2RA,IL6,IL7R,IRF1,IRF8,ITGA4,ITGAL,ITGB7,LCP1,MSR1,NAIP,NAMPT,NFKB2,PDCD1,PNP,PTGER4,PTPRJ,SH2D2A,SOCS1,SOCS3,TBX21,TNF,TNFAIP3,TNFRSF11A,TNFRSF1B,TNFSF10,XCL1
NR3C1		ligand-dependent nuclear receptor	Inhibited	-2.95049		2.12E-19	402 (16)	ACTB,ALOX5AP,ARRB2,B2M,BIRC3,BTK,C1R,C4A/C4B,CASP4,CASP7,CCL2,Ccl2,CCL3L3,CCL4,CCL5,CD38,CD47,CD69,CORO2A,CSRNP1,CXCL10,Cxcl9,DAXX,FASLG,FCER1G,GBP2,GLIPR1,GPR65,GZMA,ICAM1,IFIH1,IFIT1B,IFIT2,IL10,IL15,IL1B,IL3RA,IL6,IL7R,IRF1,IRF8,ISG15,ITGB2,LTB,MAP3K14,Mx1/Mx2,MYD88,NAIP,NAMPT,NFKB2,NLRC4,NLRP3,NOD2,NOS2,OASL,PDPN,PIK3CD,PTK2B,RELT,RGS2,SELE,SERP2,SERPINB9,SERPINE1,SLC38A1,Tgtp1/Tgtp2,TLR1,TLR…
BCL6		transcription regulator	Inhibited	-2.98487	bias	5.38E-20	384 (20)	BCL2A1,BCL3,CCL2,Ccl2,Ccl6,Ccl7,CCR7,CD2,CD69,CD72,CDKN2A,CIITA,CTLA4,CXCL10,EBI3,ENTPD1,FUT7,IL10,IL21R,IL2RA,IL2RB,IL4R,IL6,IL7R,IRF8,IRF9,KLK1,Ly6a (includes others),NOS2,PTPRO,SERPINE1,SOCS3,SYK,TBX21,TNFRSF14
DNASE2		enzyme	Inhibited	-3.1045	bias	4.43E-21		Apol9a/Apol9b,CH25H,CXCL10,DHX58,IFIT1B,IFIT3,IRF7,ISG15,Ly6a (includes others),Ms4a4b (includes others),Mx1/Mx2,OAS1,Oasl2,RSAD2,RTP4,SLAMF8,Sp100,TNF,USP18,ZBP1
TAB1		enzyme	Inhibited	-3.31976	bias	4.07E-21	300 (16)	BIRC3,CCL5,CFB,CH25H,CXCL10,GBP1,GBP2,GCH1,IFIH1,IFIT1,IL1B,IL6,IRF7,RGS2,SAA1,SELE,SERPINE1,TNFSF10,XAF1
SOCS3	1.809	phosphatase	Inhibited	-3.65775	bias	1.33E-18	365 (16)	ATF3,Ccl2,CD40,CD86,CTLA4,CXCL10,FCGR1A,ICAM1,IFIT1,IFIT2,IL10,IL1B,IL1RN,IL4R,IL6,IRF1,ISG20,MX1,Mx1/Mx2,NOS2,OAS1,OAS2,SOCS1,SOCS3,TNF,TNFRSF1B
USP18	3.384	peptidase	Inhibited	-3.68295	bias	3.02E-17	283 (20)	Ccl2,CCL3L3,CXCL10,IFITM3,IL6,IRF1,IRF7,IRF9,ISG15,MX1,OAS1,SOCS1,SOCS3,TNFSF10
DUSP1		phosphatase	Inhibited	-3.72521		1.22E-13	247 (16)	CCL2,Ccl2,CCL3L3,CCL4,CD40,CD86,CYBB,IL10,IL1B,IL1RN,IL6,ISG20,MYOG,NOS2,PLAUR,SELE,TLR2,TNF,VCAM1,ZFP36
APOE		transporter	Inhibited	-3.85667	bias	6.63E-17	358 (17)	ACTB,C5AR1,CASP3,Ccl2,CCL3L3,CCL4,CCL5,CCR5,CD40,CD86,CTSB,CTSS,CYBB,FCGR2B,ICAM1,IL10,IL10RA,IL10RB,IL1B,IL1RN,IL6,ITGA5,ITGAM,LIPA,LIPG,MSR1,NCF1,NCF2,NOS2,PTK2B,PTX3,SELE,SERPINE1,SOCS3,STAT4,TCIRG1,TIMP1,TNF,TNFRSF14,TNFSF14,VCAM1,ZYX
IRF4		transcription regulator	Inhibited	-3.92212	bias	2.79E-20	412 (21)	ADA,B2M,Ccl2,CDKN2A,CIITA,CTLA4,CTSS,CXCL10,CXCR4,ENTPD1,GBP1,IL10,IL12RB1,IL18RAP,IL1B,IL6,IL7R,INPP5D,IRF1,IRF5,IRF7,IRF9,ISG15,ITGAL,OAS1,PHF11,PLAUR,PLSCR1,STAT1,STAT2,TBX21,TNF,TNFRSF9,TNFSF10,TRIM21,XCL1
Irgm1	4.751	other	Inhibited	-4.19832	bias	5.44E-15	351 (12)	CCL5,CXCL10,Cxcl9,IFI16,Ifi27l2a/Ifi27l2b,IFIT1B,IFIT2,IFIT3,Iigp1,IL6,IRF7,LILRB4,OAS2,OASL,RSAD2,SELP,TNF,USP18
MAPK1		kinase	Inhibited	-4.93822		1.47E-43	360 (19)	ADAR,ATF3,C1S,CCL2,CCL3L3,CCL4,CCL5,CD69,CD84,CFB,CTSB,CTSW,DUSP2,EIF2AK2,ERAP1,FASLG,FES,GBP1,GBP2,GBP5,GNG2,HDC,HLA-DMA,HLA-E,IFI16,IFI35,IFI44,IFIH1,IFIT1,IFIT2,IFIT3,IFITM3,IL12RB1,IL1B,IL1RN,IL2RA,IL6,IRF7,IRF9,ISG15,ISG20,LAG3,LGALS1,LGALS3BP,NKG7,NMI,NOS2,OAS1,OAS2,OASL,OGFR,PARP12,PHF11,PLSCR1,PML,POU2F2,PSMB8,PSMB9,PSME2,PTGER2,RGS16,SAMHD1,SECTM1,Serpina3g (includes others),SP110,STAT1,…
Nr1h		group	Inhibited	-4.97214	bias	9.67E-21	314 (16)	ABCG1,APOC2,BCL3,Ccl2,CCL3L3,CCL5,CCR5,CCR7,CD40,CLEC4E,CXCL10,HCK,HLA-DOA,IFIH1,IL10,IL15,IL1B,IL6,ITGAL,LAT2,LTB,MARCKSL1,Mx1/Mx2,NFKB2,NFKBIZ,NLRP3,NOS2,Oas1b,PML,RUNX3,SELP,SLC8A1,Slfn1,SP110,TAP1,TNF
ACKR2		g-protein coupled receptor	Inhibited	-5.2915	bias	9.43E-33		ADAR,CCL5,CXCL10,Cxcl9,DHX58,EIF2AK2,IFI16,Ifi27l2a/Ifi27l2b,IFI44,Ifi47,IFIT1B,IFIT2,IFIT3,Ifitm1,Iigp1,IL1B,IRF7,IRG1,ISG15,ISG20,OAS1,OAS2,OASL,Oasl2,RSAD2,STAT1,STAT2,USP18
Alpha catenin		group	Inhibited	-5.42019	bias	7.23E-17	285 (10)	ADAM8,ADAMTS4,BCL3,BIRC3,C1QTNF3,CTSB,CXCL10,CXCL6,ENG,ICAM2,IL1B,IL2RG,IL6,IRF1,ITGA5,ITGAM,LYN,NFKBIZ,PTX3,RELB,SAA1,SELE,SOCS3,TGM2,TIMP1,TNF,TNFAIP2,TNFAIP3,VCAM1,ZYX
PTGER4	1.202	g-protein coupled receptor	Inhibited	-5.48214	bias	3.34E-52	408 (17)	ADAMTS4,CCL2,Ccl2,CCL3L3,CCL4,Ccl7,CCR7,CD40,CD69,CH25H,CMPK2,CXCL10,Cxcl9,CXCR4,CYBB,DAXX,FAM49A,GBP2,GBP6,HAVCR2,HERC6,HGF,IFI16,IFI35,Ifi47,IFIH1,IFIT1B,IFIT2,IGF2BP2,Igtp,IL10,IL1B,IL6,IRF1,IRF7,IRGM,Irgm1,ISG20,Mx1/Mx2,NCF1,NCF2,NOS2,Oas1b,OSM,PARP14,RASSF2,RSAD2,RTP4,Serpinb6b,SLAMF8,SLC13A3,SLFN13,SLFN5,ST8SIA4,TAGAP,Tgtp1/Tgtp2,TLR8,TNF,TNFSF10,TOR3A,TRIM21,USP18,XAF1
IL1RN	1.313	cytokine	Inhibited	-5.6697	bias	8.85E-25	412 (17)	ATF3,BDKRB1,CCL2,CIITA,CTSS,GBP1,GSDMD,HERC6,HLA-DQB1,ICAM1,IFI44,IFIH1,IFIT3,IL10,IL18BP,IL1B,IL6,IRF1,IRF7,IRF9,ISG20,MX1,NOS2,OAS1,OAS2,OASL,PML,RSAD2,RTP4,SELE,SLC15A3,STAT2,THEMIS2,TIMP1,TNF,TNFSF10,UBD,USP18
NKX2-3		transcription regulator	Inhibited	-5.84206		4.93E-22		ADAP1,ARHGDIB,BATF2,C19orf66,CASP1,CD38,CMPK2,CSRNP1,CXCL16,DHX58,EIF2AK2,GBP1,GBP2,GCA,GCH1,GIMAP7,HELZ2,HLA-F,IDO1,IL18BP,IL7R,LGMN,LY6E,MYD88,PARP12,PARP14,PARP9,PLSCR1,PSMB8,PSMB9,RTP4,SP110,STAT1,STAT2,TAP1,TAP2,TRIM21,TRIM5,UBA7,UBE2L6,UNC93B1,USP18,VCAM1,XAF1,ZC3HAV1,ZNFX1
mir-21		microrna	Inhibited	-6.10275	bias	7.51E-41	434 (18)	AIF1,AOAH,C1R,Casp12,CASP4,CCL19,CCL2,CCL3L3,CD180,CD274,CDKN2A,CSF3R,CXCL10,Cxcl3,Cxcl9,DHX58,FASLG,FCGR1A,FCGR2A,FGL2,GBP2,GBP5,GBP6,GBP7,Gbp8,ICAM1,IDO1,IFI16,Ifi47,Iigp1,IL1B,IL6,IRF1,IRGM,Irgm1,ITK,Klrk1,LTB,MYD88,NLRP3,OAS2,PILRB,PSME2,SIGLEC1,SIRPB1,Slfn2,Sp100,STAT1,STAT2,TAP1,TBX21,Tgtp1/Tgtp2,TLR1,TLR2,TNF,TNFRSF9,TRAF1,VCAM1
SOCS1	2.971	other	Inhibited	-6.30873	bias	1.87E-44	403 (16)	BAK1,BCL2A1,CCL2,Ccl2,CCNE1,CCR7,CD40,CD69,CD86,CIITA,CXCL10,Cxcl9,CXCR3,FCER1G,GBP5,GBP6,H2-T24,ICAM1,IFI16,IFI44,Ifi47,IFIH1,IFIT1,IFIT1B,IFIT2,IFIT3,Iigp1,IL12RB1,IL15,IL1B,IL2RB,IL4R,IL6,IRF1,IRF7,IRG1,IRGM,ISG15,ISG20,MX1,Mx1/Mx2,MYD88,NOS2,OAS1,OAS2,Oasl2,SELE,SOCS1,SOCS3,STAT1,TLR3,TNF,VAV1,VCAM1
CD3		complex	Inhibited	-6.65986	bias	2.20E-52	417 (17)	ACTR3,ARHGDIB,BATF,BCL2A1,BIRC3,C1R,CASP3,CASP8,CCL3L3,CCL4,CCL5,CCNE1,CCR1,CCR5,CD2,CD247,CD27,CD274,CD28,CD3E,CD4,CD5,CD53,CD69,CD74,CD86,CD8A,CD8B,CH25H,CORO1A,CRLF2,CTLA4,CTSW,CXCL10,CXCR3,CXCR4,CXCR6,CYBA,DOCK2,DUSP2,EBI3,ETS1,FASLG,FCER1G,FTL,FUT7,FYB,GBP1,GFI1,GZMA,GZMB,HLA-DQB1,ICAM1,ICAM2,ICOS,IFI35,IFIT1,IL10,IL10RB,IL12RB1,IL18R1,IL1B,IL21R,IL27RA,IL2RA,IL2RB,IL2RG,IL4R,IL6,IL7R,IRF1,I…
TRIM24		transcription regulator	Inhibited	-7.15193	bias	1.82E-49	245 (7)	Apol9a/Apol9b,Bst2,CMPK2,CXCL10,DHX58,EPSTI1,FAM26F,GBP2,HERC6,Ifi27l2a/Ifi27l2b,IFI35,IFI44,Ifi47,IFIH1,IFIT1B,IFIT2,IFIT3,IFNGR2,Igtp,Iigp1,IRF1,IRF7,IRF9,IRGM,Irgm1,ISG15,LGALS3BP,Ly6a (includes others),MOV10,Ms4a4b (includes others),NMI,OAS1,OASL,PARP12,PHF11,PLAC8,PSMB10,PSMB8,PSMB9,RTP4,SAMHD1,SERPINE1,SHISA5,SOCS1,STAT1,STAT2,TAP1,Tgtp1/Tgtp2,TLR2,TRAFD1,TRIM6-TRIM34,UBA7,USP18
IL10RA	2.840	transmembrane receptor	Inhibited	-7.97714		1.89E-48	387 (17)	ABCG1,APOC2,BATF2,CCL5,CCR7,CD300LF,CD40,CD69,CFB,CLEC12A,CLEC4E,CLEC9A,CSF3R,CST7,CTSE,Cxcl9,F10,FAM26F,FASLG,GBP2,GBP5,GBP6,Gbp8,GPR171,GPR18,H2-Q8,H2-T22,HGF,HK3,HLA-A,HPSE,HTR7,IFI16,Ifi47,Iigp1,IL12RB1,IL18BP,IL1B,IL1RN,IL2RG,IL6,IRF1,IRF7,IRG1,IRGM,Irgm1,ITGB7,Klrk1,Ly6a (includes others),MLKL,NAMPT,NOS2,PARVG,PDCD1,PSMB8,PSMB9,RIPK3,RSAD2,SAMHD1,SECTM1,SELL,Serpina3g (includes others),Serp…

## Sheet: Feet USR day 30 feet (Fig 1B)
IPA Upstream regulators (USR); up-regulated genes in feet day 30
Upstream Regulator	Fold Change	Molecule Type	Predicted Activation State	Activation z-score	Notes	p-value of overlap	Mechanistic Network	Target molecules in dataset
IFNG		cytokine	Activated	10.2917	bias	3.37E-93	216 (17)	AIF1,AIM2,ALOX15,ALOX5AP,B2M,BATF2,BCL2A1,BST1,Bst2,C1QA,C1QB,C1QC,C5AR1,CCL17,CCL2,Ccl2,CCL3L3,CCL4,CCL5,Ccl7,Ccl8,CCR5,CD14,CD2,CD274,CD4,CD40,CD72,CD74,CDKN2A,CFB,CH25H,CIITA,CLEC4E,CLEC5A,CMPK2,CORO1A,CTSK,CTSS,CXCL10,CXCL16,CXCL2,Cxcl9,CXCR3,CXCR4,CYBA,CYBB,DTX3L,EBI3,FAM26F,FCER1G,FCGR1A,FCGR2A,FCGR3A/FCGR3B,FPR2,GBP2,GBP4,GBP5,GBP6,GBP7,Gbp8,GLIPR2,GSDMD,GZMB,HCK,HERC6,HLA-A,HLA-DMA,HLA-DM…
TNF		cytokine	Activated	8.381	bias	1.46E-44	227 (15)	ACP5,ALOX5,ALOX5AP,APOBEC3B,B2M,BCL2A1,C5AR1,CCL17,CCL2,Ccl2,CCL3L3,CCL4,CCL5,Ccl7,Ccl9,CCR5,CCR7,CD14,CD274,CD4,CD40,CD69,CDKN2A,CFB,CH25H,CIITA,CLEC4E,CLEC5A,COL3A1,CTSS,CXCL10,CXCL13,CXCL16,CXCL2,Cxcl9,CXCR3,CXCR4,CYBA,CYBB,EBI3,FCER1G,FPR2,GBP2,GBP6,H19,HGF,HK3,HLA-A,HLA-E,HLA-F,HP,ICAM1,IFI16,IFIH1,IFIT1B,IFIT3,IGF2,IL10RA,IL21R,INPP5D,IRF1,IRF5,IRF7,IRF8,IRG1,ISG15,ITGA4,ITGAL,ITGAM,ITGB2,I…
Interferon alpha		group	Activated	7.24727	bias	4.09E-50	174 (14)	AIM2,APOBEC3B,B2M,BCL2A1,Bst2,C3AR1,CCL2,CCL5,CCR5,CCR7,CD40,CD69,CH25H,CIITA,CXCL10,CXCL2,Cxcl9,CXCR3,DHX58,FCER1A,FCGR1A,GBP2,HLA-A,HLA-G,ICAM1,IFI16,IFIH1,IFIT1B,IFIT2,IFIT3,IL10RA,IL21R,IRF1,IRF5,IRF7,IRF8,ISG15,ITGA4,ITGAM,LILRB4,MX1,Mx1/Mx2,NOS2,OAS2,PHF11,PSMB8,PSMB9,RSAD2,Slfn1,SLFN13,Slfn2,SLFN5,STAT1,TAP1,TAP2,TAPBP,Tgtp1/Tgtp2,TLR2,TLR7,TLR8,TNFSF10,TNFSF13B,TRIM5,UBE2L6,USP18,VCAM1,ZB…
IRF7	2.066	transcription regulator	Activated	7.237	bias	1.64E-55	176 (15)	BC147527,CCL5,CD40,CD69,CMPK2,CXCL10,DHX58,FAM26F,FCGR1A,GBP4,GBP5,IFI16,IFI44,IFIH1,IFIT1B,IFIT2,IFIT3,Igtp,IRF1,IRF7,IRF8,IRGM,Irgm1,ISG15,ITGAM,Ms4a4b (includes others),MX1,Mx1/Mx2,OAS2,OAS3,OASL,Oasl2,PARP14,PHF11,PLAC8,PSMB10,PSMB8,PSMB9,RSAD2,RTP4,Slfn1,STAT1,TAP1,TAP2,TLR8,TNFSF10,TNFSF13B,TRAF1,Trim30a/Trim30d,TRIM5,UBA7,UBE2L6,USP18,XAF1,ZBP1
NFkB (complex)		complex	Activated	6.69689	bias	7.39E-23	191 (15)	ABCG1,BCL2A1,CCL17,CCL2,Ccl2,CCL3L3,CCL4,CCL5,Ccl7,CCR7,CD274,CD40,CD69,CD74,CFB,CIITA,CLEC4E,CXCL10,CXCL2,Cxcl9,CXCR3,CXCR4,CYBB,FCGR1A,FPR2,GBP2,HLA-A,HLA-DMB,HLA-F,ICAM1,IL10RA,IRF1,IRF7,ISG15,ITGAL,ITGAM,MMP9,NCF2,NFKBIE,NOS2,POU2F2,PSMB9,RSAD2,SELPLG,SERPINE1,TAP1,TAP2,TFEC,TIMP1,TLR2,TNFSF10,TRAF1,VCAM1
Ifnar		group	Activated	6.54996	bias	1.38E-62	217 (16)	APOBEC3B,B2M,Bst2,CCL2,Ccl2,CCL5,CD274,CD40,CD74,CXCL10,Cxcl9,FCER1A,FCER1G,GBP2,H2-Q8,HLA-A,HLA-E,HLA-G,IFI16,IFIH1,IFIT1B,IFIT2,IFIT3,IRF1,IRF7,IRF8,Irgm1,ITGA4,MMP9,Mx1/Mx2,OAS2,OASL,PSMB8,PSMB9,RSAD2,Sp100,STAT1,TAP1,TAP2,TAPBP,TLR2,TNFSF10,UBE2L6,UNC93B1,USP18,VCAM1,XAF1,ZBP1
IL1B		cytokine	Activated	6.25772	bias	8.50E-38	221 (16)	AIF1,ALOX15,BCL2A1,CCL17,CCL2,Ccl2,CCL4,CCL5,Ccl7,Ccl9,CCR5,CCR7,CD14,CD274,CD4,CD40,CD69,CD74,CFB,CIITA,CMPK2,CTSS,CXCL10,CXCL2,Cxcl9,CXCR3,CXCR4,CYBA,CYBB,EBI3,FPR2,GBP2,GBP6,H19,HGF,HLA-A,HLA-E,HP,ICAM1,IFI16,IFIT1B,IFIT3,IL10RA,IRF1,IRF7,IRG1,ISG15,ITGAM,ITGB3,LCP1,MMP13,MMP8,MMP9,MX1,MYOG,NOS2,OAS2,Ppbp,PSMB10,PSMB8,PSMB9,RAC2,RSAD2,RUNX2,Saa3,SERPINE1,Slfn2,STAT1,TAP2,Tgtp1/Tgtp2,TIMP1,TLR2…
STAT1	1.475	transcription regulator	Activated	6.24191	bias	1.59E-61	209 (15)	ALOX15,APOBEC3B,B2M,BATF2,CCL2,Ccl2,CCL3L3,CCL4,CCL5,Ccl8,CCR7,CD14,CD274,CD40,CFB,CH25H,Chil3/Chil4,CIITA,CMPK2,CXCL10,Cxcl9,CXCR3,DCSTAMP,FAM26F,FCER1G,FCGR1A,GBP2,GBP5,GBP6,HERC6,HLA-DRB5,ICAM1,IFI16,IFIT1B,IFIT2,IFIT3,Igtp,IRF1,IRF5,IRF7,IRF8,IRG1,Irgm1,ISG15,Klrk1,LY6E,MMP9,MX1,Mx1/Mx2,NEURL3,NOS2,OAS2,OASL,PSMB10,PSMB8,PSMB9,RSAD2,SAMHD1,Slfn1,SLFN13,Slfn2,SLFN5,SP110,STAT1,TAP1,Tgtp1/Tgtp2…
MYD88		other	Activated	6.11265	bias	2.03E-35	201 (19)	APOBEC3B,CCL2,Ccl2,CCL3L3,CCL4,CCL5,CD14,CD200R1,CD274,CD40,CH25H,CMPK2,CTSK,CXCL10,CXCL13,CXCL2,Cxcl9,EBI3,FPR2,HLA-A,HP,ICAM1,IFIT1B,IFIT2,INPP5D,IRF1,IRF7,IRG1,ISG15,ITGA4,ITGB7,MMP8,MMP9,Ms4a4b (includes others),MSR1,NOS2,OASL,RSAD2,SAMHD1,SERPINE1,TFEC,TIMP1,TLR2,TNFSF13B,USP18,VCAM1,Vnn3
IRF3		transcription regulator	Activated	6.04293	bias	2.31E-46	168 (15)	APOBEC3B,B2M,BC147527,CCL2,Ccl2,CCL3L3,CCL4,CCL5,CD69,CMPK2,CXCL10,Cxcl9,CXCR3,DHX58,FAM26F,FCGR1A,GBP5,HLA-F,IFI16,IFI44,IFIH1,IFIT1B,IFIT2,IFIT3,Igtp,IRF5,IRF7,IRGM,Irgm1,ISG15,MMP9,Ms4a4b (includes others),Mx1/Mx2,NOS2,OAS2,OAS3,OASL,Oasl2,PARP14,PHF11,PLAC8,RSAD2,Slfn1,STAT1,TAP1,Trim30a/Trim30d,UBE2L6,USP18,ZBP1
TLR4		transmembrane receptor	Activated	5.92765	bias	4.20E-38	176 (18)	APOBEC3B,CCL2,Ccl2,CCL3L3,CCL4,CCL5,Ccl7,Ccl8,CCR5,CD14,CD200R1,CD274,CD40,CFB,CMPK2,CTSK,CXCL10,CXCL2,Cxcl9,EBI3,GBP2,ICAM1,IFI16,IFIT1B,IFIT2,IFIT3,Igtp,Iigp1,IL2RB,IRF1,IRF7,IRF8,IRGM,Irgm1,ISG15,ITGAM,LILRB4,MMP9,MX1,Mx1/Mx2,NOS2,OASL,PLEK,RGS1,RGS14,RSAD2,SLA,STAT1,TLR2,TNFAIP8L2,TNFSF10,TRAF1,VCAM1,Vnn3
IFNA2		cytokine	Activated	5.9052	bias	3.84E-36	189 (17)	ALOX5,B2M,CCL2,CDKN2A,CMPK2,CXCL10,GBP2,HERC6,HLA-A,HLA-E,IFI16,IFI44,IFIH1,IFIT2,IFIT3,IL2RB,IRF1,IRF5,IRF7,ISG15,LGALS3BP,LILRB4,LY6E,LYN,MMP9,MX1,Mx1/Mx2,OAS2,OAS3,PARP9,PHF11,RSAD2,SAMHD1,SAMSN1,SLC15A3,SP110,STAT1,TAP1,THEMIS2,TNFSF10,TRIM14,UBA7,UBE2L6,USP18,XAF1,ZBP1
TLR3		transmembrane receptor	Activated	5.8445	bias	1.23E-37	184 (18)	AIM2,CCL17,CCL2,Ccl2,CCL3L3,CCL4,CCL5,Ccl7,CD274,CD40,CD69,CFB,CMPK2,CTSK,CXCL10,CXCL2,Cxcl9,DHX58,GBP2,GBP4,ICAM1,IFI16,IFI44,IFIH1,IFIT2,IFIT3,Iigp1,IRF7,IRG1,ISG15,Klrk1,LILRB4,MX1,Mx1/Mx2,NOS2,OASL,Oasl2,RGS1,RSAD2,SERPINE1,STAT1,TIMP1,TLR7,TNFAIP8L2,TNFRSF1B,TNFSF10,TNFSF13B,USP18,ZBTB32
TGM2		enzyme	Activated	5.79662	bias	5.71E-22	127 (7)	BCL2A1,C5AR1,CCL2,CD300C,CD74,CXCL10,DCSTAMP,FCER1G,HK3,IFIT2,IFIT3,IL10RA,ITGAM,ITGB3,LRRC25,LY6E,MMP8,MMP9,NCF2,OAS2,OAS3,OASL,PARP14,PARP9,RUNX2,SAMHD1,SLAMF7,SLFN5,SP110,STAT1,TAP1,TYROBP,UBA7,XAF1
APP		other	Activated	5.78562	bias	1.54E-31	184 (16)	ABCG1,AIF1,ARL11,ATP1A3,CCL2,Ccl2,CCL3L3,CCL4,CCL5,Ccl7,CCR5,CD40,CD69,CD74,CH25H,Chil3/Chil4,CMPK2,CXCL10,CXCL2,Cxcl9,CXCR4,CYBB,FCGR1A,FCGR2A,GBP2,GBP4,GBP6,H19,HAVCR2,HERC6,HGF,HLA-E,ICAM1,IFI16,IFIH1,IFIT1B,IFIT2,IGF2,Igtp,IRF1,IRF5,IRF7,IRGM,Irgm1,ITGA4,ITGAL,ITGAM,ITGB3,Ly6a (includes others),MMP13,MMP9,MSR1,Mx1/Mx2,NCF1,NOS2,PARP14,PTPRC,RSAD2,RTP4,SERPINE1,SLAMF8,SLC13A3,SLFN13,SLFN5,ST8S…
TICAM1		other	Activated	5.72945	bias	5.15E-32	174 (19)	APOBEC3B,CCL2,Ccl2,CCL3L3,CCL4,CCL5,CD40,CFB,CH25H,CMPK2,CXCL10,CXCL13,CXCL2,FPR2,ICAM1,IFI16,IFIT1B,IFIT2,IFIT3,Igtp,IRF1,IRF7,IRG1,IRGM,Irgm1,ISG15,Ms4a4b (includes others),Mx1/Mx2,OASL,RSAD2,SAMHD1,SERPINE1,TFEC,TLR2,TNFSF10,VCAM1
IKBKB		kinase	Activated	5.44188	bias	1.57E-18	185 (16)	CCL17,CCL2,Ccl2,CCL3L3,CCL4,CCL5,Ccl9,CCR7,CH25H,CTSK,CXCL10,CXCL2,Cxcl9,CXCR4,CYBA,GBP2,HGF,HLA-A,ICAM1,IFI16,IFIT1B,IRF1,IRG1,ISG15,ITGB3,MMP13,MMP9,MX1,NOS2,Slfn2,TNFRSF1B,VCAM1
SPI1		transcription regulator	Activated	5.36561	bias	1.73E-31	196 (17)	C1QC,CCL17,CCR7,CD14,CD180,CD72,CEBPE,CIITA,CSF2RA,CTSK,CTSS,Cxcl9,CYBB,DCSTAMP,EPX,FCER1A,FCER1G,FES,HK3,IFIT1B,ISG15,ITGA4,ITGAM,ITGB2,Klra4 (includes others),LILRB3,NCF1,NCF2,NCF4,NOS2,OSCAR,PRG2,PSMB10,PSMB8,PSMB9,PTPRC,TFEC,TLR2,TNFRSF14,VAV1
TLR9	1.708	transmembrane receptor	Activated	5.36055	bias	4.91E-25	198 (16)	CCL17,Ccl2,CCL3L3,CCL4,CCL5,Ccl7,CCR7,CD274,CD300A,CD40,CD69,CXCL10,EBI3,IFI16,IFIT1B,IFIT2,IFIT3,IRF7,IRG1,ISG15,LAIR1,LILRB4,Mx1/Mx2,NOS2,Oasl2,RSAD2,SERPINE1,TIMP1,TLR7,TNFRSF1B,TNFSF10,TNFSF13B,USP18
OSM		cytokine	Activated	5.35664	bias	6.56E-13	174 (19)	ABCG1,B2M,CCL2,Ccl2,CCL5,CH25H,COL3A1,CXCL10,CXCL13,CXCL2,GBP2,HGF,HLA-A,HLA-F,HP,ICAM1,IRF1,IRF7,ITGAL,MMP13,MMP8,MMP9,MX1,NOS2,PSMB8,PSMB9,SERPINE1,STAT1,STX11,TAP1,TAP2,TAPBP,TIMP1,TLR2,TNFRSF11A,UBE2L6,VCAM1
PRL		cytokine	Activated	5.34621	bias	1.89E-20	187 (17)	B2M,CCL2,CD40,CD69,CMPK2,COL3A1,CTSS,CXCL10,DHX58,DTX3L,EPSTI1,HERC6,IFI44,IFIH1,IFIT3,IGF2,IRF1,IRF7,ISG15,LY6E,MLKL,NOS2,OAS2,OAS3,PARP14,PTPN18,RSAD2,SAMHD1,SP110,STAT1,TIMP1,TNFSF13B,TRIM14,USP18,XAF1
CSF1		cytokine	Activated	5.3429	bias	4.84E-24	181 (20)	ACP5,CCL2,Ccl2,CCL5,Ccl7,CCR5,CTSK,CXCL2,DOK2,FCER1G,FCGR2A,FCGR3A/FCGR3B,GRAP2,Iigp1,IL10RA,IRF5,IRF7,ITGA4,ITGAM,ITGB3,MMP9,MSR1,OSCAR,PTPRC,SIGLEC1,SIRPB1,STAT1,TLR2,TLR9,TNFRSF11A,TNFRSF1B,VCAM1
IFNB1		cytokine	Activated	5.31397	bias	1.50E-51	218 (17)	APOBEC1,Bst2,CCL2,Ccl2,CCL4,CCL5,CCR5,CD14,CD274,CD40,CH25H,CLEC4E,CMPK2,CTSK,CXCL10,CXCL2,CXCR3,DHX58,EBI3,GBP2,GBP4,GBP5,GBP6,GBP7,Gbp8,HLA-A,IFI16,Ifi27l2a/Ifi27l2b,IFIH1,IFIT1B,IFIT2,IFIT3,Igtp,IRF1,IRF7,IRG1,IRGM,Irgm1,ISG15,ITGB3,MMP9,MX1,Mx1/Mx2,NFKBIE,NOS2,OAS2,RSAD2,SIRPB1,SLFN13,STAT1,Tgtp1/Tgtp2,TIMP1,Tlr13,TLR7,TLR8,TLR9,TNFSF10,Trim30a/Trim30d,UBA7,USP18,XAF1,ZBP1
CSF2		cytokine	Activated	5.22975	bias	1.83E-29	212 (18)	ABCG1,ACP5,ALOX5,ALOX5AP,BCL2A1,C5AR1,CCL17,CCL2,Ccl2,CCL3L3,CCL4,Ccl8,CCR5,CCR7,CD14,CD180,CD40,CD69,CD74,CIITA,CLEC4C,CLEC7A,CSF2RA,CXCL10,CXCL2,Cxcl9,CXCR3,CXCR4,CYBB,DOK2,FCGR1A,FPR2,HGF,HLA-DQB1,ICAM1,INPP5D,IRF5,ITGA4,ITGAM,ITGB3,LCP1,LY9,MMP9,NLRP3,NOS2,PDE1B,RHOH,SLAMF7,Slfn2,TIFA,TLR2,TLR9,TNFRSF11A,TNFRSF1B
Ifn		group	Activated	5.1567	bias	1.57E-30	171 (15)	B2M,CD40,CD69,CH25H,CXCL10,CXCR3,DHX58,HGF,HLA-A,ICAM1,IFI16,IFIH1,IL10RA,IRF1,IRF7,IRF8,ISG15,ITGA4,MMP9,MX1,Mx1/Mx2,NOS2,OAS2,OAS3,OASL,RSAD2,SERPINE1,STAT1,TAP1,TLR2,TLR7,TNFSF13B,ZBP1
SMARCA4		transcription regulator	Activated	5.12701	bias	4.55E-11	166 (15)	AIM2,ARHGAP30,BCL2A1,CCL2,CD74,CDKN2A,CIITA,CSF2RA,CTSS,CXCR3,CXCR4,FCGR2A,GMFG,HCLS1,HCST,HLA-E,HLA-F,ICAM1,IFI16,IRF1,LPXN,MYOG,NOSTRIN,PLAUR,PSMB9,PTPN7,RAC2,RGS1,SERPINE1,SLAMF9,SLC11A1,TAP1,TLR2,TM4SF19,TNFRSF14,TNFSF10
IRF1	1.541	transcription regulator	Activated	5.1097	bias	2.85E-30	207 (16)	B2M,CCL2,CCL5,CD274,CD40,CFB,CIITA,CTSS,CXCL10,CXCL16,CYBB,FPR2,GBP2,HLA-G,IFIH1,IFIT2,IFIT3,IRF1,IRF5,IRF7,ISG15,MMP9,MX1,NOS2,OAS2,PSMB10,PSMB8,PSMB9,RSAD2,STAT1,TAP1,TAP2,TAPBP,TLR9,TNFSF10,VCAM1
TNFSF11		cytokine	Activated	4.95507	bias	2.48E-32	189 (20)	ACP5,AIF1,ATP6V0D2,BCL2A1,BST1,C3AR1,CCL2,Ccl2,CCL3L3,CCL4,CCL5,Ccl7,Ccl8,Ccl9,CD14,CD300LF,CD40,CLEC4E,CTSK,DCSTAMP,DOK2,FGR,HCK,HCLS1,ICAM1,IRF8,IRG1,ITGAL,ITGAM,ITGB3,LAT,MMP9,NOS2,OCSTAMP,OSCAR,PLAUR,SERPINE1,SIGLEC15,Slfn2,STAT1,TLR2,TNFRSF11A,TNFRSF1B,TRAF1,VCAM1
IL15		cytokine	Activated	4.92043	bias	4.10E-24	176 (17)	CCL17,CCL2,Ccl2,CCL4,CCL5,CD2,CD274,CD40,CD53,CD69,CD74,CORO1A,CTSW,CXCL10,CXCL2,CXCR4,FCGR3A/FCGR3B,FYB,GZMB,HAVCR2,HCST,IL21R,IL2RB,IRF1,ITGB7,Klra4 (includes others),Klrk1,LCK,LYN,MX1,NOS2,PLEK,PSMB10,PSMB8,PSMB9,PTPRC,RAC2,SELPLG,TIMP1,TLR2,TNFSF10,TRIM5,TYROBP,VCAM1
IL1		group	Activated	4.91684	bias	7.25E-12	177 (20)	CCL2,Ccl2,CCL4,CCL5,CCR7,CD40,CFB,CLEC7A,CXCL10,H19,HGF,HP,ICAM1,IL2RB,IRF1,ITGAM,ITGB2,MMP13,MMP9,NOS2,RUNX2,SERPINE1,TIMP1,TLR2,TLR7,TNFRSF1B,TNFSF10,VCAM1
IFN alpha/beta		group	Activated	4.8984	bias	2.93E-32	215 (17)	CCL2,CCL5,CCR7,CD40,CD69,CXCL10,CXCL16,Cxcl9,H2-Q8,HLA-A,IFI16,Ifi27l2a/Ifi27l2b,IFIT2,IFIT3,IRF1,IRF7,IRF8,Irgm1,Ly6a (includes others),LY6E,Mx1/Mx2,NOS2,RSAD2,Sp100,STAT1,Tgtp1/Tgtp2,TLR2,TLR7,TNFSF10,TNFSF13B
IL17A		cytokine	Activated	4.81282	bias	4.10E-16	181 (14)	BCL2A1,CCL17,CCL2,Ccl2,CCL4,CCL5,Ccl7,CD14,CD274,CD40,CTSK,CXCL13,CXCL2,GBP2,ICAM1,IFIT1B,ISG15,MMP13,MMP8,MMP9,NOS2,Tgtp1/Tgtp2,TIMP1,TLR2,TNFRSF11A,VCAM1
CHUK		kinase	Activated	4.81241	bias	3.19E-18	188 (15)	CCL2,Ccl2,CCL3L3,CCL4,CCL5,Ccl9,CH25H,CXCL10,CXCL13,CXCL2,CXCR3,CYBA,GBP2,GBP4,HLA-A,ICAM1,IFI16,IFIT1B,IFIT2,IRG1,ISG15,ITGB3,MMP13,MMP9,Slfn2,SNX10,TNFRSF1B,TNFSF13B,VCAM1
STAT3		transcription regulator	Activated	4.7973	bias	4.23E-43	222 (18)	ALOX15,C5AR1,CCL17,CCL2,CCL3L3,CCL4,CCL5,Ccl8,CCR5,CD274,CD40,CD74,CDKN2A,CFB,CIITA,COL3A1,CXCL10,CXCL13,CXCL2,Cxcl9,FCER1G,FCGR1A,GBP2,GLIPR1,GZMB,H2-Q8,HGF,HLA-A,HLA-DMA,HLA-DQA1,HLA-DRB5,HP,ICAM1,IFI16,IFI44,IFIH1,IFIT1B,IFIT3,IL2RB,IRF1,IRF7,ISG15,ITGAM,ITGB2,LILRB4,MMP13,MMP9,MX1,NOS2,OAS2,OAS3,OASL,PLAUR,PSMB8,PSMB9,SERPINE1,Slfn1,SLFN13,Slfn2,SLFN5,SP110,STAT1,TAP1,TIMP1,TNFRSF1B,TNFSF10,T…
IL2		cytokine	Activated	4.78353	bias	7.11E-22	170 (15)	CCL2,CCL3L3,CCL4,CCL5,CCR5,CCR7,CD2,CD274,CD3D,CD3G,CD40,CD69,CSF2RA,CTSW,CXCL10,Cxcl9,CXCR3,CXCR4,CYTH4,FCER1G,FCGR3A/FCGR3B,GZMB,HAVCR2,HCK,HCST,ICAM1,IL10RA,IL2RB,IRF1,ITGA4,ITGB7,LAPTM5,LCK,LCP2,Ly6a (includes others),LY6E,MMP9,MX1,NOS2,PTPN7,PTPRC,SELPLG,TIMP1,TLR2,TNFRSF11A,TNFRSF1B,TNFSF10,TRAF1
RELA		transcription regulator	Activated	4.77729	bias	1.09E-18	182 (14)	B2M,BCL2A1,CCL2,Ccl2,CCL5,CCR7,CD14,CD40,CD69,CDKN2A,CFB,CIITA,CXCL10,CXCL2,CXCR4,CYBB,ICAM1,IFIT1B,INPP5D,IRF1,IRF7,ISG15,LYN,MMP9,Mx1/Mx2,NFKBIE,NOS2,OAS2,PSMB10,PSMB9,TAP1,TAP2,TAPBP,Tlr13,TLR2,TLR9,TRAF1,VCAM1
IL6		cytokine	Activated	4.69485	bias	3.85E-35	197 (16)	C5AR1,CCL2,Ccl2,CCL3L3,CCL4,CCL5,CCR5,CCR7,CD14,CD40,CD48,CD53,CD74,CDKN2A,Chil3/Chil4,CIITA,CLEC4E,COL3A1,CTSK,CXCL10,CXCL13,CXCL2,Cxcl9,CXCR3,CXCR4,CYBB,FCGR1A,FPR2,GBP2,H2-Q8,HGF,HLA-A,HLA-DMA,HLA-DQA1,HLA-DRB5,HP,ICAM1,IFI16,IFIT1B,IFIT2,IGF2,IRF1,ITGAM,ITGB3,LY86,MMP13,MMP8,MMP9,MSR1,NCF2,NOS2,PSMB10,PSMB8,PSMB9,PTPRC,RNASE6,RUNX2,SERPINE1,SNX10,SP110,STAT1,TAP1,TBXAS1,TIMP1,TLR2,TLR7,TLR8,T…
IFNL1		cytokine	Activated	4.63588	bias	8.09E-23	162 (13)	CCR7,CD40,CXCL10,HERC6,IFI44,IFIH1,IFIT2,IFIT3,ISG15,LGALS3BP,MX1,OAS2,OAS3,OASL,PHF11,PSMB9,RSAD2,SP110,STAT1,TLR2,TRIM14,UBE2L6,USP18
SAMSN1	1.152	other	Activated	4.58258	bias	5.75E-18	140 (9)	CCL3L3,CCL4,Ccl7,CD40,CMPK2,CXCL10,CXCL2,Cxcl9,IFIT1B,IFIT2,IFIT3,Iigp1,IRF1,IRF7,IRGM,ISG15,Mx1/Mx2,OASL,RSAD2,STAT1,Vnn3
CD40LG		cytokine	Activated	4.57054	bias	1.64E-34	181 (14)	B2M,BATF3,BCL2A1,CCL17,CCL2,Ccl2,CCL4,CCL5,CCR5,CCR7,CD40,CD69,Chil3/Chil4,CIITA,CSF2RA,CXCL10,CXCL13,CXCL2,CXCR3,CXCR4,EBI3,GZMB,HLA-DQA1,HLA-DQB1,ICAM1,IFI44,IFIT2,IFIT3,IL10RA,IL21R,IL2RB,IRF1,ISG15,ITGA4,ITGAM,ITGB7,MX1,NFKBIE,NOS2,PLAUR,PLEK,PSMB10,PSMB8,PSMB9,PTPN7,RGS1,SAMSN1,SELPLG,SERPINE1,STAT1,TAP1,TAP2,TNFRSF11A,TNFSF10,TRAF1,VCAM1
P38 MAPK		group	Activated	4.56751	bias	2.48E-15	170 (19)	BATF2,BCL2A1,CCL2,Ccl2,CCL3L3,CCL5,CCR7,CD40,CD69,CDKN2A,COL3A1,CTSK,CXCL10,CYBB,HP,ICAM1,IRF7,ITGA4,ITGAM,ITGB2,ITGB3,MMP13,MMP9,MYOG,NOS2,PLAUR,RUNX2,SERPINE1,STAT1,TIMP1,TLR2,TNFSF10,VCAM1
IFN Beta		group	Activated	4.56161	bias	3.03E-27	174 (15)	C3AR1,CCR7,CD274,CD40,CD69,CD74,CXCL10,HLA-A,HLA-G,IFI16,IFI44,IFIH1,IFIT1B,IFIT2,IFIT3,IRF1,IRF7,ISG15,MMP9,MX1,Mx1/Mx2,NOS2,OAS2,OASL,RSAD2,STAT1,TAPBP,TNFSF10,TRIM14,USP18,XAF1,ZBP1
ETS1		transcription regulator	Activated	4.51169	bias	3.33E-14	174 (18)	CCL2,Ccl2,CCL5,CD14,CDKN2A,FCGR2A,HCST,HGF,ICAM1,IL2RB,ITGB2,ITGB3,Klra4 (includes others),Klrk1,LAIR1,LCK,MMP13,MMP9,MSR1,NCF1,RUNX2,SERPINE1,SLAMF6,TBXAS1,WAS
NFATC2		transcription regulator	Activated	4.46076	bias	8.63E-14	228 (16)	ACP5,CCL3L3,CD3G,CD40,CMPK2,CXCL10,GBP4,IFIT1B,IFIT2,IFIT3,Iigp1,IRF1,IRF7,IRGM,ISG15,Mx1/Mx2,OASL,RGS1,RSAD2,STAT1,ZBTB32
IL27		cytokine	Activated	4.45623	bias	1.60E-19	214 (19)	B2M,CCL2,CCL4,CCL5,CD14,CD74,CIITA,CXCL10,GBP2,GZMB,HLA-A,HLA-DMA,HLA-DMB,HLA-DQA1,HLA-DQB1,HLA-E,ICAM1,IRF1,ITGAM,MX1,NOS2,STAT1,TAP1,TNFSF10,TNFSF13B
IL5		cytokine	Activated	4.43297	bias	1.91E-10	162 (20)	ACP5,CCL2,CCR5,CCR7,CD40,CD69,CIITA,CXCR3,CXCR4,GBP2,GBP4,GBP7,GLIPR2,ICAM1,IRF7,ITGAM,ITGB7,KCNAB2,LCP2,MMP9,NOS2,PKIB,RHOH,ZBTB32
IFNAR1		transmembrane receptor	Activated	4.35815	bias	1.32E-43	219 (17)	Apol9a/Apol9b,B2M,CCL17,CCL3L3,CCL4,CCL5,Ccl9,CD40,CH25H,CIITA,CLEC4D,CLEC4E,CMPK2,CXCL10,CXCL2,Cxcl9,HLA-A,IFI16,IFI44,IFIH1,IFIT1B,IFIT2,IFIT3,IRF7,IRG1,ISG15,Ly6a (includes others),Ms4a4b (includes others),Mx1/Mx2,NOS2,OAS2,OAS3,OASL,Oasl2,RSAD2,RTP4,Sp100,STAT1,TLR2,TNFSF13B,USP18
LEP		growth factor	Activated	4.33915	bias	7.65E-09	147 (20)	BCL2A1,CCL2,Ccl2,CCL3L3,CCL5,CD14,CD40,Chil3/Chil4,COL3A1,CXCL10,CYBA,CYBB,ICAM1,Irgm1,ITGAM,MMP13,MMP19,MYOG,NCF1,NCF2,NOS2,RUNX2,SERPINE1,Tgtp1/Tgtp2,TIMP1,TNFSF10,VCAM1
STAT4		transcription regulator	Activated	4.29248	bias	5.22E-11	203 (15)	CCL2,CCR5,CXCL10,CXCL2,Cxcl9,FCER1G,FYB,HLA-DQB1,IFIH1,IFIT1B,IFIT2,IL10RA,IRF1,ISG15,Ms4a4b (includes others),Mx1/Mx2,PLAC8,SELPLG,SERPINE1,STAT1,TIMP1,Trim30a/Trim30d
IL18		cytokine	Activated	4.24817	bias	2.30E-16	139 (18)	CCL2,Ccl2,CCL3L3,CCL4,CCL5,CCR5,CCR7,CD40,CD69,CXCL10,CXCL16,FCGR3A/FCGR3B,HAVCR2,ICAM1,INPP5D,IRF1,ITGAM,MMP13,MMP9,NOS2,SAMHD1,TIMP1,VCAM1
DOCK8		other	Activated	4.24264	bias	1.29E-16		CCL4,CD40,CMPK2,CXCL10,Cxcl9,IFIT1B,IFIT2,IFIT3,Iigp1,IRF1,IRF7,IRGM,ISG15,Mx1/Mx2,RGS1,RSAD2,STAT1,Vnn3
CD44		enzyme	Activated	4.22075	bias	9.34E-13	189 (20)	Ccl2,CCL4,CCL5,Ccl7,CCR5,CCR7,CD69,CLEC5A,CLEC7A,COL3A1,CTSK,Cxcl9,CXCR3,ITGA4,Ly6a (includes others),MMP13,MMP8,MMP9,TLR8,TNFRSF11A,VCAM1
PARP1		enzyme	Activated	4.17519	bias	1.05E-15	214 (14)	Ccl2,CCL5,CD274,CXCL10,Cxcl9,GBP2,GBP4,GBP6,GBP7,H19,ICAM1,Igtp,Iigp1,IRGM,ITGAL,NOS2,STAT1,Tgtp1/Tgtp2,VCAM1
SASH1		other	Activated	4.12311	bias	4.41E-15		CCL4,CD40,CMPK2,CXCL10,IFIT1B,IFIT2,IFIT3,Iigp1,IRF1,IRF7,IRGM,ISG15,Mx1/Mx2,OASL,RSAD2,STAT1,Vnn3
IRF5	1.014	transcription regulator	Activated	4.11932	bias	7.07E-21	190 (18)	CCL4,CCL5,CMPK2,CXCL10,CXCR4,DHX58,IFI44,IFIH1,IFIT2,IFIT3,IRF5,IRF7,ISG15,OAS2,OASL,Oasl2,RSAD2,SP110,STAT1,TNFSF10,UBE2L6
TNFSF12		cytokine	Activated	3.97899	bias	1.25E-18	163 (18)	BST1,CCL2,Ccl2,CCL3L3,CCL5,Ccl7,Ccl9,CCR5,CLEC4D,CLEC4E,CSF2RA,CXCL10,CXCL2,ICAM1,ITGAM,MMP13,MMP9,MYOG,NCF4,TIMP1,VCAM1
IL1A		cytokine	Activated	3.92466	bias	1.09E-06	125 (18)	CCL2,CCL4,CCL5,CD274,CD40,CXCL10,CXCL2,ICAM1,ITGB3,MMP13,MMP9,NOS2,P2RY6,SERPINE1,TLR2,VCAM1
Jnk		group	Activated	3.90719	bias	1.17E-10	167 (18)	CCL2,Ccl2,CCL4,CCL5,CCR7,CD40,CD69,COL3A1,CXCR4,ICAM1,ITGA4,ITGB7,MMP13,MMP9,NCF1,NOS2,PLAUR,SERPINE1,TIMP1,VCAM1
IFNA1/IFNA13		cytokine	Activated	3.88877	bias	9.54E-16	177 (14)	CD40,CD69,CXCL10,DHX58,IFIH1,IFIT2,IRF1,ISG15,MX1,OAS2,RSAD2,SIGLEC1,STAT1,Tgtp1/Tgtp2,UBE2L6,ZBP1
Ifn gamma		complex	Activated	3.80331	bias	2.28E-12	176 (22)	CCL2,Ccl2,CCL5,CXCL10,CXCL16,Cxcl9,CXCR3,CYBB,ICAM1,IRF8,Ly6a (includes others),MMP9,NOS2,STAT1,TNFSF10,XAF1
MAP3K7		kinase		3.79835	bias	3.99E-17	164 (12)	Ccl2,CCL5,Ccl7,CCR7,CD14,CFB,CH25H,CXCL10,CXCL2,GBP2,IFIH1,IRF1,IRF7,MMP13,SERPINE1,TNFSF10,TNFSF13B,XAF1
DDX58		enzyme	Activated	3.77306	bias	1.64E-14	159 (16)	CCL5,CD4,CXCL10,CXCR3,IFI44,IFIH1,IFIT1B,IFIT2,IFIT3,IRF1,IRF7,ISG15,Mx1/Mx2,RSAD2,STAT1
Hbb-b2		other	Activated	3.74166	bias	3.20E-15	117 (7)	C1QA,Ccl2,Ccl7,CCR5,CD74,CIITA,CLEC7A,CXCL10,Cxcl9,CXCR3,IL10RA,IL2RB,LY86,TLR2
PI3K (complex)		complex	Activated	3.71235	bias	2.63E-08	130 (19)	CCL2,Ccl2,CCL4,CD2,CD274,CXCL10,CXCR4,CYBB,H19,ICAM1,IGF2,ITGAM,ITGB2,MMP13,MMP9,NOS2,SAMHD1,SERPINE1,TNFRSF11A,TNFSF10,VCAM1
IFN type 1		group	Activated	3.63715	bias	7.70E-22	179 (17)	Bst2,Ccl2,CCL5,CD69,CXCL10,Cxcl9,DHX58,IFI16,IFIH1,IFIT1B,IFIT2,IRF1,ISG15,MMP9,Mx1/Mx2,OASL,STAT1,TNFSF10,UBA7
Tlr		group	Activated	3.62738	bias	1.59E-11	184 (17)	CCL2,Ccl2,CCL4,CCL5,CCR7,CD40,CXCL10,FPR2,HLA-A,ICAM1,IRF1,IRF7,NOS2,RGS1,RGS14,STAT1,TNFSF13B
NFKB1		transcription regulator	Activated	3.58018	bias	1.57E-21	185 (16)	B2M,BCL2A1,CCL2,Ccl2,CCL3L3,CCL4,CCL5,CD3G,CD40,CFB,CIITA,CSF2RA,CXCL10,CXCL2,Cxcl9,CYBB,EBI3,HLA-DMB,ICAM1,IFIT1B,IRF1,ISG15,MMP13,MMP9,MSR1,Mx1/Mx2,NOS2,POU2F2,STAT1,TLR2,TLR9,TNFSF10,TRAF1,VCAM1
F2		peptidase	Activated	3.57625	bias	5.02E-07	166 (22)	CCL2,CXCR4,CYBB,DOCK10,ICAM1,MMP9,MYOG,NCF1,NCF2,NOS2,PLAUR,RAC2,SERPINE1,TAGLN3,TAP2,TNFSF10,TRAF1,VCAM1
JAK1		kinase	Activated	3.53514	bias	9.61E-14	161 (16)	CCL2,CCL3L3,CD40,HLA-A,HLA-F,ICAM1,IFIT2,IRF1,MX1,PSMB9,STAT1,TAP1,USP18
RIPK2		kinase	Activated	3.52663	bias	2.35E-10	172 (12)	Ccl2,CCL5,CD40,CD69,CLEC4E,CLEC5A,CXCL10,CXCL2,ICAM1,IRG1,NOS2,TRAF1,VCAM1
MAVS		other	Activated	3.49322	bias	5.30E-17	168 (14)	CCL5,CMPK2,CXCL10,CXCL2,DHX58,IFIT1B,IFIT2,IFIT3,IRF7,ISG15,OAS2,OASL,Oasl2,RSAD2,STAT1,TLR7,UBE2L6
PARP9	1.269	enzyme	Activated	3.44036	bias	4.12E-18	131 (7)	CD74,HLA-DQA1,HLA-DQB1,HLA-E,IFI44,IFIT2,IFIT3,IRF7,ISG15,OAS2,SP110,STAT1
CEBPB		transcription regulator	Activated	3.43233	bias	1.71E-11	179 (20)	ALOX5AP,BCL2A1,CCL2,Ccl2,CCL3L3,CCL4,CCL5,CCR5,CD14,CLEC4E,CXCL2,CXCR4,GLIPR2,HGF,HLA-A,HP,ICAM1,ITGAL,LCP2,LYN,MMP13,MSR1,NOS2,PLAUR,PRG2,RAC2,RUNX2,SERPINE1,TLR8,TLR9
TLR2	1.625	transmembrane receptor	Activated	3.42648	bias	6.44E-19	179 (16)	CCL2,Ccl2,CCL3L3,CCL5,CCR5,CD40,CD69,Chil3/Chil4,CSF2RA,CXCL10,CXCL2,Cxcl9,CYBB,EBI3,FPR2,HLA-DQA1,HLA-DRB5,ICAM1,IRF1,ITGA4,ITGB7,MMP9,MX1,NOS2,TLR2,TNFAIP8L2
JAK2		kinase	Activated	3.41231	bias	1.71E-14	162 (18)	CCL2,Ccl2,CCL5,Ccl9,CDKN2A,CXCL10,CYBB,GBP2,ICAM1,IRF1,LAT2,LY6E,LYN,NKG7,NOS2,PSMB9,SLAMF9,SLC11A1,STAT1,TAP1
EIF2AK2		kinase	Activated	3.37288	bias	3.90E-08	168 (15)	IRF1,ISG15,LGALS3BP,NOS2,OAS3,PARP9,PSMB10,SAMHD1,SP140,STAT1,UBE2L6,USP18
FZD9		g-protein coupled receptor	Activated	3.2827	bias	4.75E-16	58 (7)	Ccl2,CCL5,CXCL10,IFI16,Ifi27l2a/Ifi27l2b,IFI44,IFIT1B,IRF7,ISG15,Oasl2,STAT1
NFKBIA		transcription regulator	Activated	3.2721	bias	2.94E-16	187 (16)	BCL2A1,CCL2,Ccl2,CCL3L3,CCL5,Ccl7,Ccl9,CD40,CD69,CH25H,COL3A1,CXCL10,CXCL2,CXCR4,CYBA,GBP2,GZMB,HLA-A,ICAM1,IFI16,IFIT1B,IGF2,IRF1,IRG1,ISG15,KCNN4,LY6E,MMP13,MMP9,NFKBIE,NOS2,Slfn2,TIMP1,TLR2,TNFRSF1B,TNFSF10,TRAF1,VCAM1
TLR7	1.216	transmembrane receptor	Activated	3.26364	bias	1.72E-09	174 (17)	BCL2A1,CCL2,CCL3L3,CCL5,CCR7,CD40,CXCL10,CXCL2,ICAM1,INPP5D,IRF7,ISG15,Mx1/Mx2,RSAD2,TLR7
Tnf (family)		group	Activated	3.25801	bias	9.95E-14	145 (18)	C3AR1,CCL2,Ccl2,CCL4,CCL5,CCR5,CD4,CD40,CD72,CXCL10,ICAM1,MMP13,MMP9,NOS2,RUNX2,SERPINE1,TLR2,TNFRSF1B,TNFSF13B,TRAF1,VCAM1
NOD2		other	Activated	3.2544	bias	5.80E-11	169 (16)	BCL2A1,CCL2,CCL5,CD40,CLEC4E,CLEC5A,CXCL10,CXCL2,ICAM1,IRG1,ITGAM,NOS2,TRAF1
IKBKG		kinase	Activated	3.22689	bias	5.51E-11	180 (17)	Ccl2,CCL5,Ccl8,Ccl9,CH25H,CXCL2,GBP2,HLA-A,ICAM1,IFI16,IFIT1B,IRF7,IRG1,ISG15,Slfn2,TNFRSF1B,TNFSF10
FADD		other	Activated	3.16849	bias	2.62E-16	154 (15)	Ccl2,CXCL10,CXCL2,CXCR4,DHX58,ICAM1,IFIH1,IFIT1B,IFIT2,IRF5,IRF7,LY6E,MMP9,Mx1/Mx2,MYOG,PSMB8,Sp100,ST8SIA4,STAT1
PAF1		other	Activated	3.16228	bias	7.14E-09		CCL3L3,CCL5,IFI44,IFIT3,ISG15,OAS2,OAS3,OASL,PLAUR,SERPINE1
TNK1		kinase	Activated	3.13786	bias	4.29E-14	155 (10)	IFI16,IFIH1,IFIT1B,IFIT2,IRF7,NOS2,OAS2,TLR8,TLR9,TNFSF10
TRPV4		ion channel	Activated	3.12995	bias	3.88E-12	159 (14)	Ccl2,CCL3L3,CCL5,Ccl7,Ccl8,CXCL10,CXCL2,TIMP1,TLR2,VCAM1
EBI3	1.300	cytokine	Activated	3.07665	bias	5.39E-13	208 (17)	B2M,CIITA,GBP2,HLA-A,HLA-DMA,HLA-DMB,HLA-DQA1,ICAM1,IRF1,MX1,STAT1,TAP1,TNFSF10
IFNA4		cytokine	Activated	3.06882	bias	3.88E-12	172 (14)	CD69,CXCL10,IFIH1,IFIT2,ISG15,MX1,Mx1/Mx2,OASL,USP18,ZBP1
ARHGAP21		other	Activated	3	bias	4.77E-08		CXCL10,CXCL2,Cxcl9,IFIT3,Iigp1,IRF1,IRGM,Mx1/Mx2,Vnn3
VIPR1		g-protein coupled receptor	Activated	2.96972	bias	1.47E-12	147 (15)	Ccl2,CCL3L3,CCL4,CCL5,CD40,CXCL10,CXCL2,IRF1,NOS2
CD14	1.393	transmembrane receptor	Activated	2.9521	bias	1.66E-09	146 (15)	BCL2A1,CCL2,Ccl2,CCL3L3,CCL4,CCL5,CXCL10,CXCL2,IL10RA,NOS2,TLR2
TRAF6		enzyme	Activated	2.94956	bias	3.21E-07	183 (18)	CCL17,CCL2,CD274,CXCL13,CXCL2,ICAM1,IRF5,MMP13,NOS2
IRF8	1.573	transcription regulator	Activated	2.93354	bias	2.16E-21	214 (15)	B2M,CCL5,Ccl9,CCR7,CD14,CD4,CD40,CEBPE,CFB,CIITA,CTSS,CXCL16,Cxcl9,CYBB,ICAM1,IFIT2,IRF5,IRF8,ISG15,ITGAM,MMP9,MSR1,NOS2,STAT1,TLR9,TYROBP
TCR		complex	Activated	2.92326	bias	6.74E-25	195 (20)	AIM2,BCL2A1,CCL17,CCL3L3,CCL4,CCL5,CCR5,CCR7,CD4,CD69,CXCL10,CXCL13,CXCR3,CXCR4,DHX58,GBP4,GZMB,IFI44,IFIH1,IFIT2,IFIT3,IRF1,IRF7,ISG15,ITGB7,Klra4 (includes others),LAT,LCK,LCP2,MX1,OASL,PTPRC,RSAD2,STAT1,TLR7,TLR9,TNFRSF1B,TNFSF13B,TNIP3,VAV1,ZBTB32
LDL		complex	Activated	2.89315	bias	2.40E-19	168 (20)	ABCG1,APOBEC3B,BCL2A1,CCL2,Ccl2,CCL4,CCL5,CCR7,CD40,CDKN2A,CTSK,CXCL10,CXCL13,CXCL2,CYBB,FCGR1A,ICAM1,IFIT2,IL10RA,IRF7,ITGB3,MMP8,MMP9,MSR1,MX1,NCF1,NOS2,OSCAR,SERPINE1,SIGLEC1,TNFAIP8L2,VCAM1
TRADD		other	Activated	2.82843	bias	1.91E-08	162 (17)	BCL2A1,CCL2,CXCL2,ICAM1,IRF1,MMP9,TRAF1,VCAM1
TMEM173	1.102	other	Activated	2.82843	bias	6.06E-08	162 (10)	C15orf48,CCL5,CXCL2,Cxcl9,GBP5,IFI16,NOS2,OASL
IL7		cytokine	Activated	2.80952	bias	2.86E-13	178 (22)	CCL2,Ccl2,CCL4,CD2,CD274,CD3D,CD3G,CD69,CTSK,CXCR4,HAVCR2,HCST,ITGB7,Ly6a (includes others),LYN,MMP13,MMP9,MX1,RUNX2,TNFSF10
ITK		kinase	Activated	2.80728	bias	1.10E-10	119 (7)	CCL5,CD4,FCER1G,HLA-A,IL10RA,IL2RB,Klra4 (includes others),Klrk1,LAT2,Ly6a (includes others),LYN,MYO1F,SLAMF7,TNFSF10
TYROBP	1.139	transmembrane receptor	Activated	2.78861	bias	1.30E-09	166 (15)	CCL2,CCR7,CD40,CD69,ICAM1,ITGAM,Klra4 (includes others),NCKAP1L,SIRPB1,TYROBP
IL3		cytokine	Activated	2.78388	bias	7.98E-16	145 (19)	ALOX5AP,C1QA,CCL2,CD14,CD3D,CD3G,CD40,CD48,CD53,CD69,CLEC4C,CXCR4,DOK2,FCER1A,FCGR2A,HGF,HLA-A,ICAM1,ITGAM,ITGB3,ITGB7,LILRB4,LY9,LYN,NCF1,PDE1B,PRG2,PTPN22,SLAMF7,TLR2,TNFRSF11A,TNFSF10,VCAM1
BCR (complex)		complex	Activated	2.7699	bias	1.12E-15	158 (18)	BCL2A1,BTK,CCL4,CCR7,CD300A,CD69,CDKN2A,CXCR4,GBP2,GZMB,HLA-DMA,IL2RB,ITGA4,KCNN4,LAIR1,LCK,MS4A6A,POU2F2,PTPN22,SLAMF7,TLR9
MOG		other	Activated	2.76326	bias	1.71E-18	187 (19)	C5AR1,Ccl2,CCL3L3,CCL5,Ccl7,CCR5,CD274,CD40,CIITA,CXCL10,CXCL2,Cxcl9,ICAM1,ITGAL,MMP9,NOS2,VCAM1
IL13		cytokine	Activated	2.74789	bias	1.91E-25	183 (18)	ALOX15,ALOX5AP,BCL2A1,C3AR1,CCL17,CCL2,Ccl2,CCL3L3,CCL4,CCL5,Ccl7,Ccl8,CCR5,CD14,CD4,CD40,CD48,CD72,Chil3/Chil4,CLEC4E,CLEC7A,COL3A1,CTSK,CTSS,CXCL2,CXCR4,CYBB,FCGR1A,FCGR2A,FGD2,FPR2,ICAM1,LILRB3,MMP13,MMP9,NOS2,SAMSN1,SERPINE1,SLA,ST8SIA4,TFEC,TIMP1,TNFRSF11A,TNFRSF1B,TNFSF13B,VCAM1
C5		cytokine	Activated	2.71812	bias	8.07E-11	171 (17)	C5AR1,CCL2,Ccl2,CCL3L3,CCL4,CCL5,CXCL2,CYBB,FCGR1A,FCGR2A,HGF,ICAM1,ITGAM,ITGB2,SERPINE1,VCAM1
NOS2	3.248	enzyme	Activated	2.70975		3.15E-19	181 (16)	BCL2A1,CCL2,Ccl2,CCL3L3,CCL4,Ccl7,Ccl9,CD14,CD53,Chil3/Chil4,CLEC4D,CXCL2,Cxcl9,H19,H2-T10,IFIT1B,IFIT3,ISG15,LCK,LGALS3BP,LILRB4,MMP9,NOS2,Slfn2,Tgtp1/Tgtp2,TIMP1,TNFSF10,TNFSF13B,TYROBP
IL12 (complex)		complex	Activated	2.67842	bias	6.44E-26	201 (16)	CCL17,CCL2,Ccl2,CCL4,CCL5,CCR5,CCR7,CD69,CXCL10,Cxcl9,CXCR3,EBI3,GZMB,HAVCR2,ICAM1,IFIH1,IFIT1B,IFIT2,Iigp1,IRF1,IRF8,ISG15,ITGA4,ITGAL,ITGB2,Ly6a (includes others),MMP9,Ms4a4b (includes others),Mx1/Mx2,NOS2,PLAC8,SELPLG,Tgtp1/Tgtp2,TIMP1,TLR2,Trim30a/Trim30d
IL12B		cytokine	Activated	2.64934	bias	1.27E-10	209 (19)	Ccl2,CCL5,CCR5,CXCL10,GZMB,ICAM1,INPP5D,NOS2,PIK3AP1,SELPLG,STAT1,VCAM1
Hbb-b1		transporter	Activated	2.62998	bias	1.59E-17	152 (12)	C1QA,Ccl2,Ccl7,CCR5,CD74,CIITA,CLEC7A,CXCL10,Cxcl9,CXCR3,ICAM1,IL10RA,IL2RB,LY86,TLR2,VCAM1
BAX		transporter	Activated	2.56273	bias	2.02E-08	170 (13)	CCL5,CTSK,CTSS,CXCL10,H2-T10,HLA-A,IRF7,MMP9,Mx1/Mx2,TIMP1
KRT17		other	Activated	2.52982	bias	5.41E-11		CCL17,CCL3L3,CCL4,CCL5,CCR5,CLEC7A,CXCL10,CXCL2,MMP13,MMP9
CD40	1.718	transmembrane receptor	Activated	2.4815	bias	4.00E-24	169 (13)	BCL2A1,CCL17,CCL2,Ccl2,CCL4,CCL5,CD40,CD69,CXCL10,Cxcl9,HLA-DQB1,ICAM1,IL10RA,IL2RB,IRF1,ITGAL,ITGAM,ITGB2,Ly6a (includes others),MMP9,NOS2,PSMB10,PSMB9,SAMSN1,SERPINE1,SLAMF7,TAP1,TAP2,TAPBP,TLR2,TLR9,TNFSF10,TNFSF13B,TRAF1,VCAM1
TBK1		kinase	Activated	2.43591	bias	1.10E-17	180 (18)	CCL3L3,CCL4,CCL5,CD40,CMPK2,CXCL10,CXCL2,Cxcl9,CXCR3,ICAM1,IFIT1B,IFIT2,Iigp1,IRF7,IRG1,ISG15,Mx1/Mx2,RSAD2,TLR2,Vnn3
TLR5		transmembrane receptor	Activated	2.40098	bias	3.16E-06	176 (16)	Ccl2,CCL4,CCL5,CD40,CXCL2,ICAM1,TLR7
STAT2		transcription regulator	Activated	2.38623	bias	1.71E-18	182 (18)	Ccl2,CCL5,CIITA,CXCL10,IFIT1B,IFIT2,IFIT3,IRF1,IRF5,IRF7,ISG15,MX1,OAS2,PSMB8,RSAD2,TNFSF10,USP18
TNFRSF1A		transmembrane receptor	Activated	2.2977	bias	3.52E-10	128 (17)	CCL2,Ccl2,CCL3L3,CCL4,CCL5,CXCL10,CXCL13,CXCL2,ICAM1,ITGAM,MMP13,MMP9,NOS2,SERPINE1,TRAF1,VCAM1
TNFSF10	1.252	cytokine	Activated	2.25458		4.48E-09	168 (19)	CD14,CD69,CXCR4,HLA-A,HLA-F,IFI16,ISG15,ITGAM,MMP9,STAT1,TIMP1,TNFSF10,TRAF1
IL12 (family)		group	Activated	2.20728	bias	3.57E-07	207 (20)	CCL4,CCL5,CCR5,CD274,CD69,FCGR3A/FCGR3B,IRF1,IRF8,SAMHD1,STAT1,TNFSF10
IL17RA		transmembrane receptor	Activated	2.2	bias	1.60E-04	191 (19)	Ccl2,CXCL2,MMP13,MMP9,TIMP1
IL6R		transmembrane receptor		1.97452	bias	2.84E-10	165 (19)	CCL2,CCL5,CXCL10,CXCL2,HP,ICAM1,IGF2,IRF1,MMP13,MMP9,TIMP1,TNFRSF11A,VCAM1
CSF3		cytokine		1.9743	bias	1.12E-17	170 (16)	C3AR1,Ccl2,CCL3L3,CCL5,CCR7,CD14,CD300LF,CEBPE,CXCR4,CYBB,FCGR1A,GZMB,HGF,HLA-DQA1,ICAM1,ITGAM,ITGB2,Ly6a (includes others),MMP8,MMP9,RGS1,TLR2,TLR8,TNFRSF1B,TNFSF10,VCAM1
Fibrinogen		complex		1.91005	bias	3.50E-11	159 (15)	CCL2,Ccl2,CCL3L3,CCL4,CD40,FCGR3A/FCGR3B,ICAM1,ITGAM,TLR2
TGFB1		growth factor		1.90314	bias	2.18E-25	228 (22)	ABCG1,AIM2,ALOX15,ALOX5,ALOX5AP,B2M,C1QA,C1QB,C1QC,C3AR1,C5AR1,CCL2,Ccl2,CCL3L3,CCL4,CCL5,Ccl7,Ccl8,CCR5,CCR7,CD14,CD300A,CD4,CD40,CD69,CD72,CDKN2A,CIITA,COL3A1,CTSK,CTSS,CXCL10,CXCL2,CXCR3,CXCR4,CYBA,CYBB,DOCK2,FCER1A,FCER1G,FCGR1A,FCGR3A/FCGR3B,FPR2,FXYD5,GBP2,GZMB,HCST,HGF,HLA-DMA,HLA-DQA1,HLA-DQB1,HLA-DRB5,ICAM1,IFI16,IFIH1,IFIT3,IGF2,IL10RA,IL2RB,INPP5D,IRF1,ITGA4,ITGAL,ITGAM,ITGB2,ITGB3,ITG…
IgG		complex		1.86097	bias	9.20E-12	181 (17)	B2M,CCL2,Ccl2,CCL4,CCL5,CD40,COL3A1,FCGR1A,FCGR2A,HLA-E,ISG15,KRT31,LY9,MMP9,PLAUR,SERPINE1,SLAMF7,TAPBP,TLR7,VCAM1
ERK1/2		group		1.7802	bias	2.75E-19	187 (21)	ALOX5,ATP1A3,B2M,BCL2A1,CCL2,Ccl2,CCL3L3,CCL4,CCL5,CCR7,CD40,COL3A1,CXCL10,CXCR4,CYBB,H19,HLA-A,ICAM1,ITGB3,MMP13,MMP9,MYOG,NOS2,PLAUR,PSMB10,PSMB8,PSMB9,RUNX2,SERPINE1,TAP1,TAP2,TAPBP,TIMP1,VCAM1
CREBBP		transcription regulator		1.75506	bias	3.18E-17	184 (18)	B2M,CCL5,CCR5,CCR7,CD53,CXCL10,Cxcl9,CXCR3,CXCR4,CYBB,EPSTI1,HLA-G,IFIT1B,IL10RA,IL2RB,INPP5D,IRF1,ISG15,ITGB7,LGALS3BP,MMP9,MYO1F,NOS2,OAS3,PSMB9,RSAD2,RTP4,RUNX2,SLAMF6,TAP2,TAPBP,TLR2,TNFAIP8L2,TNFSF10,TRAF1,USP18,VCAM1
TNFRSF1B	1.206	transmembrane receptor		1.70677	bias	4.08E-10	167 (21)	CCR5,CD69,Chil3/Chil4,CXCL13,ICAM1,MMP13,MMP9,MSR1,NOS2,SERPINE1,TIMP1,TNFRSF11A,TRAF1
IL12A		cytokine		1.70536	bias	3.79E-07	172 (19)	CCL5,CXCL10,EBI3,ICAM1,MMP9,NOS2,SELPLG,STAT1,VCAM1
CAMP		other		1.68009	bias	2.02E-11	161 (20)	C5AR1,CCL2,Ccl2,CCL4,CCL5,Ccl7,CCR7,CXCL10,CXCR4,FPR2,ICAM1,ITGAM,ITGB2,NOS2
Ige		complex		1.54807	bias	2.42E-12	152 (17)	CCL2,Ccl2,CCL3L3,CCL4,CCL5,Ccl9,CXCL2,FCER1A,FCER1G,FCGR1A,HAVCR2,TLR7,TLR9
MAPK9		kinase		1.48025	bias	1.31E-05	172 (22)	CCL2,Ccl2,Ccl7,CDKN2A,IFI16,Iigp1,LGALS3BP,MMP9,NOS2,PARP14,SELPLG,Vnn3
IKBKE		kinase		1.46819	bias	3.93E-18	181 (19)	Ccl2,CCL3L3,CCL5,CXCL10,CXCR3,HLA-A,IFI16,IFIH1,IFIT2,IFIT3,IRF7,IRG1,MMP13,MMP9,NOS2,RSAD2,STAT1
IL21		cytokine		1.34162	bias	3.13E-09	161 (20)	CCL5,CCR7,CD2,CD69,CXCL10,CXCL13,GZMB,HCST,IL21R,IL2RB,Klra4 (includes others),MMP9,NOS2,PTPRC,TYROBP
IRAK4		kinase		1.3017	bias	6.50E-07	184 (16)	CCL17,Ccl2,CXCL10,CXCL16,CXCL2,IFIT1B,IRF1,IRF5,IRF7,NOS2
TIRAP		other		0.997234	bias	3.48E-08	172 (15)	CCL4,CCL5,CD40,CXCL10,CXCL2,ICAM1,IRF1,VCAM1
CCR2		g-protein coupled receptor		0.913249	bias	6.59E-20	202 (20)	CCL17,CCL2,Ccl2,CCL3L3,CCL4,CCL5,Ccl7,Ccl8,Ccl9,CCR5,CD40,Chil3/Chil4,CXCL10,CXCL13,CXCL2,Cxcl9,ITGAL,MMP13,MMP9,TIMP1
IL4		cytokine		0.752587	bias	6.19E-47	201 (16)	ACP5,ALOX15,ALOX5,ALOX5AP,C5AR1,CCL17,CCL2,Ccl2,CCL3L3,CCL4,CCL5,Ccl7,CCR5,CCR7,CD14,CD2,CD300A,CD40,CD69,Chil3/Chil4,CIITA,CLEC4C,CLEC7A,CTSK,CXCL10,CXCL16,CXCL2,Cxcl9,CXCR3,CXCR4,DCSTAMP,FCER1G,FCGR2A,FCGR3A/FCGR3B,FPR2,GBP2,GBP7,GLIPR2,HCK,HCLS1,HGF,HLA-DMA,ICAM1,IFI16,IFIT1B,IFIT3,Iigp1,IL10RA,IL2RB,IRF1,IRF7,IRF8,ISG15,ITGA4,ITGAL,ITGB2,ITGB3,ITGB7,KCNAB2,Klrk1,LGALS3BP,LILRB4,MMP9,Ms4a4b (i…
MSR1	2.044	transmembrane receptor		0.738549		5.32E-10	212 (19)	CCL5,CXCL10,CXCL2,IFIT1B,IRG1,ISG15,MMP9,NOS2
IRF9		transcription regulator		0.585471		2.75E-18	165 (14)	CIITA,CXCL10,Cxcl9,IFIT2,IFIT3,IRF1,IRF5,IRF7,IRF8,ISG15,MX1,OAS2,STAT1,Tgtp1/Tgtp2,TNFSF10
FAS		transmembrane receptor		0.498083		1.44E-18	160 (16)	BCL2A1,BTK,CCL2,Ccl2,CCL3L3,CCL4,CCL5,CD300C,CD48,COL3A1,CXCL10,CXCL2,CXCR3,FES,GBP2,GLIPR1,HLA-DQB1,HLA-F,ICAM1,IL10RA,INPP5D,IRF1,LAT,LILRB4,MMP13,MMP9,NFKBIE,NOS2,PSTPIP1,RGS14,RSAD2,RUNX2,SERPINE1,TLR2,TLR8,TNFRSF1B,TNFSF10,VCAM1
TREM1		transmembrane receptor		0.494357	bias	1.26E-13	180 (13)	CCL17,Ccl2,CCL5,CCR7,CD14,CD274,CFB,CXCL10,CXCL2,CXCR4,DCSTAMP,EBI3,IFIT2,IRF1,ISG15,LY9,MMP19,OASL,PLAC8,RGS1,SLAMF7,TIFA,TLR2,TNIP3
Immunoglobulin		complex		0.449114		1.47E-22	227 (18)	BCL2A1,C3AR1,CCL2,Ccl2,CCL4,CCL5,CD274,CD69,CIITA,CXCL10,CXCL2,FCER1G,FCGR1A,FCGR2A,FCGR3A/FCGR3B,HCK,HK3,ICAM1,IL10RA,IRF1,LILRB3,Ly6a (includes others),MMP9,NAIP,NCF2,NLRP3,NOS2,RSAD2,SLC11A1,TIMP1,TLR2,TLR7,TLR8,TNFRSF11A,VCAM1
Map3k7		kinase	Activated	0.339401	bias	5.29E-14	174 (17)	Ccl2,CCL3L3,CCL4,CCL5,Ccl7,CMPK2,CXCL10,Cxcl9,IFIT2,ISG15,MMP9,Mx1/Mx2,RSAD2,VCAM1,Vnn3
IRF2		transcription regulator		0.288576		3.63E-16	175 (21)	B2M,CIITA,CTSS,CXCL10,IRF1,IRF7,IRF8,ISG15,PSMB10,PSMB8,PSMB9,TAP1,TAP2,TAPBP,TNFSF10,USP18,VCAM1
ID3		transcription regulator		0.0443242		3.88E-10	152 (13)	CCR7,CD72,CDKN2A,CXCR3,CXCR4,FCER1G,ICAM1,IFI16,IL10RA,IL2RB,IRF5,IRF8,ITGB3,MMP9,PIK3R5,PTPN22,SLAMF6,TNFSF10,TRAF1
ID2		transcription regulator		-0.242536		1.56E-09	102 (10)	CCR7,CDKN2A,CXCR3,CXCR4,FCER1G,ICAM1,IFI16,IL10RA,IL2RB,IRF5,IRF8,ITGB3,PIK3R5,POU2F2,PTPN22,SLAMF6,TNFSF10,TRAF1
TP53		transcription regulator		-0.256857		4.00E-06	180 (22)	ALOX15,ALOX5,APOBEC1,BCL2A1,C1QC,CCL2,Ccl2,CCL3L3,CCL4,CDKN2A,COL3A1,CSF2RA,CTSK,CTSW,GLIPR1,H19,HLA-DQA1,ICAM1,IFI16,IGF2,IL10RA,IL21R,IRF5,IRF7,IRF8,ISG15,ITGB7,KCNN4,Ly6a (includes others),MMP13,MMP9,MX1,Mx1/Mx2,NCF1,NFAM1,NOS2,PLAUR,PTPRO,RUNX2,SERPINE1,SPN,STAT1,TAP1,TAP2,TBXAS1,TNFRSF1B,TNFSF10,XAF1
SATB1		transcription regulator		-0.51044		2.35E-07		BCL2A1,CD40,CD69,CYBB,EBI3,EPSTI1,FCGR1A,HLA-DMB,IL10RA,IRF7,IRF8,RGS1,TNFSF13B,UBE2L6,XAF1
STAT5A		transcription regulator		-0.816497		3.34E-06	195 (16)	BCL2A1,CCL3L3,CCR5,CXCR3,FCER1G,ICAM1,IL2RB,IRF1,Klra4 (includes others),Klrk1,RUNX2,TNFRSF11A,TNFRSF14,TRAF1
STAT6		transcription regulator		-0.85281	bias	2.32E-30	194 (18)	ACP5,ALOX15,CCL17,CCL2,Ccl2,CCL3L3,CCL5,CCR5,CCR7,CD2,CD40,CD69,CTSS,CTSW,CXCL10,DCSTAMP,FCER1G,FCGR1A,FCGR2A,FCGR3A/FCGR3B,GBP2,HCK,IFI16,IFIT3,IL10RA,IRF1,IRF7,ISG15,ITGB7,LGALS3BP,LILRB4,Ly6a (includes others),MMP9,Ms4a4b (includes others),Mx1/Mx2,OCSTAMP,PKIB,SAMSN1,SERPINE1,TFEC,Tgtp1/Tgtp2,TNFRSF11A,Trim30a/Trim30d,VCAM1
IL10		cytokine		-0.867038		6.75E-44	207 (17)	ALOX5AP,BCL2A1,CCL17,CCL2,Ccl2,CCL3L3,CCL4,CCL5,CCR5,CCR7,CD14,CD2,CD274,CD40,CD72,CIITA,CLEC7A,CTSS,CXCL10,CXCL13,CXCL2,Cxcl9,CXCR3,CXCR4,FCER1G,FCGR1A,FCGR2A,FCGR3A/FCGR3B,GZMB,HLA-G,ICAM1,IFIT2,Igtp,Iigp1,IL10RA,INPP5D,IRF1,ITGA4,ITGAL,ITGB7,LILRB4,MMP8,MMP9,MSR1,MYOG,NOS2,PSMB9,SELPLG,STAT1,TAP1,TAP2,TIMP1,TLR2,TLR7,TLR8,TLR9,TNFRSF11A,TNFRSF1B,TNFSF10,TNFSF13B,TNIP3,VCAM1
CNOT7		transcription regulator		-1.06749	bias	4.22E-17	132 (7)	B2M,CMPK2,CSTA,HERC6,ISG15,LGALS3BP,OAS2,OAS3,PSMB8,SP110,STAT1,TAP1,TAP2,UBE2L6
S100A8		other		-1.34804		6.17E-11	145 (15)	ABCG1,Ccl2,CD274,CXCL10,CXCL2,Cxcl9,ICAM1,ITGAM,MMP13,NOS2,VCAM1
KRAS		enzyme		-1.52128		3.72E-05	173 (18)	Akr1c14,B2M,Basp1,CD74,CDKN2A,COL3A1,CXCL10,IGF2,IRF1,ISG15,ITGB3,Ly6a (includes others),MX1,NOS2,Slfn2,STAT1,TAP1,Trim30a/Trim30d
PROC		peptidase		-1.57762	bias	5.71E-09	159 (18)	BCL2A1,CCL2,Ccl2,CXCL2,ICAM1,MMP9,NOS2,SERPINE1,TLR2,VCAM1
CD28		transmembrane receptor		-1.64423	bias	6.88E-15	209 (18)	BCL2A1,CCL4,CCR5,CD274,CD69,CH25H,CXCL13,CXCL2,CXCR3,CXCR4,EBI3,FCER1G,FYB,GBP2,GZMB,H19,HAVCR2,HLA-DQB1,IL10RA,IL21R,IRF1,IRF8,ITGA4,ITGAL,ITGB7,LCP1,MSR1,NAIP,TNFRSF11A,TNFRSF1B,TNFSF10,TUBB1
BCL6		transcription regulator		-1.70282	bias	2.48E-13	163 (19)	BCL2A1,CCL2,Ccl2,Ccl7,CCR7,CD2,CD69,CD72,CDKN2A,CIITA,CXCL10,EBI3,IL21R,IL2RB,IRF8,Ly6a (includes others),NOS2,PTPRO,SERPINE1,TNFRSF14
HMOX1		enzyme	Inhibited	-2.18194		4.07E-10	190 (20)	ABCG1,CCL17,CCL2,Ccl2,CD14,CXCL10,CXCL2,HGF,ICAM1,ITGAM,ITGB3,MMP9,MSR1,NOS2,VCAM1
KLF2		transcription regulator	Inhibited	-2.30514	bias	4.46E-16	168 (17)	CCL2,Ccl2,CCL4,CCL5,Ccl7,CCR5,CCR7,CD40,CXCL2,CXCR3,CXCR4,DOCK2,FGR,IGF2,ITGB3,ITGB7,KCNN4,RUNX2,SERPINE1,STAT1,TIMP1,VAV1,VCAM1
DUSP1		phosphatase	Inhibited	-2.59544		1.04E-09	144 (21)	CCL2,Ccl2,CCL3L3,CCL4,CD40,CXCL2,CYBB,MYOG,NOS2,PLAUR,TLR2,VCAM1
TAB1		enzyme	Inhibited	-2.70426	bias	1.70E-14	167 (21)	CCL5,CFB,CH25H,CXCL10,GBP2,IFIH1,IRF7,MMP13,SERPINE1,TNFSF10,TNFSF13B,XAF1
USP18	1.689	peptidase	Inhibited	-2.77241	bias	3.13E-10	148 (14)	Ccl2,CCL3L3,CXCL10,IRF1,IRF7,ISG15,MX1,TNFSF10
DNASE2		enzyme	Inhibited	-3.11211	bias	8.92E-28		Apol9a/Apol9b,CH25H,CXCL10,CXCL2,DHX58,IFIT1B,IFIT3,IRF7,ISG15,Ly6a (includes others),Ms4a4b (includes others),Mx1/Mx2,OAS3,Oasl2,RSAD2,RTP4,SLAMF8,Sp100,USP18,ZBP1
VIP		other	Inhibited	-3.14745		3.95E-09	171 (18)	CCL2,Ccl2,CCL3L3,CCL4,CCL5,CD274,CD40,CXCL10,CXCL2,IRF1,NOS2,TLR8,TLR9,TNFRSF11A
NR3C1		ligand-dependent nuclear receptor	Inhibited	-3.15268		7.86E-12	204 (17)	ALOX5AP,B2M,BTK,CCL2,Ccl2,CCL3L3,CCL4,CCL5,CD69,CXCL10,CXCL2,Cxcl9,FCER1G,GBP2,GLIPR1,GPR65,ICAM1,IFIH1,IFIT1B,IFIT2,IRF1,IRF8,ISG15,ITGB2,MMP13,MMP8,MMP9,Mx1/Mx2,NAIP,NLRP3,NOS2,OASL,RUNX2,SERPINE1,Tgtp1/Tgtp2,TLR2,TNFRSF1B,TRAF1,Trim30a/Trim30d,VCAM1
SOCS3		phosphatase	Inhibited	-3.18339	bias	6.94E-09	169 (17)	Ccl2,CD40,CXCL10,FCGR1A,ICAM1,IFIT2,IRF1,MX1,Mx1/Mx2,NOS2,OAS2,TNFRSF1B
IRF4		transcription regulator	Inhibited	-3.49224	bias	5.12E-11	185 (18)	B2M,Ccl2,CDKN2A,CIITA,CTSS,CXCL10,CXCR4,INPP5D,IRF1,IRF5,IRF7,ISG15,ITGAL,PHF11,PLAUR,STAT1,TNFSF10,TNFSF13B
Alpha catenin		group	Inhibited	-3.56339	bias	1.78E-07	154 (19)	C1QTNF3,COL3A1,CXCL10,CXCL2,IGF2,IRF1,ITGAM,LYN,MMP13,MMP19,MMP9,TIMP1,VCAM1
Nr1h		group	Inhibited	-3.58677	bias	3.31E-12	185 (16)	ABCG1,Ccl2,CCL3L3,CCL5,CCR5,CCR7,CD40,CLEC4E,CXCL10,HCK,IFIH1,ITGAL,LAT2,Mx1/Mx2,NLRP3,NOS2,Slfn1,SP110,TAP1
APOE		transporter	Inhibited	-3.82476	bias	4.17E-11	155 (18)	C5AR1,Ccl2,CCL3L3,CCL4,CCL5,CCR5,CD40,CTSK,CTSS,CYBB,DCSTAMP,ICAM1,IL10RA,ITGAM,MMP9,MSR1,NCF1,NCF2,NOS2,SERPINE1,TIMP1,TNFRSF14,VCAM1
Irgm1	1.979	other	Inhibited	-3.87298	bias	3.43E-16	186 (7)	CCL5,CXCL10,Cxcl9,IFI16,Ifi27l2a/Ifi27l2b,IFIT1B,IFIT2,IFIT3,Iigp1,IRF7,LILRB4,OAS2,OASL,RSAD2,USP18
mir-21		microrna	Inhibited	-3.93415	bias	2.00E-38	235 (21)	AIF1,ALOX15,AOAH,CCL17,CCL2,CCL3L3,CD180,CD274,CDKN2A,CLEC5A,COL3A1,CXCL10,Cxcl9,DHX58,FCGR1A,FCGR2A,GBP2,GBP5,GBP6,GBP7,Gbp8,ICAM1,IFI16,Iigp1,IRF1,IRGM,Irgm1,Klrk1,MMP9,NLRP3,OAS2,OAS3,PILRB,SIGLEC1,SIRPB1,Slfn2,Sp100,STAT1,TAP1,Tgtp1/Tgtp2,TLR2,TRAF1,VCAM1
NKX2-3		transcription regulator	Inhibited	-4.2962		4.68E-12		BATF2,CMPK2,CXCL16,DHX58,GBP2,HLA-F,LY6E,PARP14,PARP9,PSMB8,PSMB9,RTP4,SP110,STAT1,TAP1,TAP2,TRIM5,UBA7,UBE2L6,UNC93B1,USP18,VCAM1,XAF1
MAPK1		kinase	Inhibited	-4.39843		8.02E-27	184 (21)	CCL2,CCL3L3,CCL4,CCL5,CD69,CD84,CFB,CSTA,CTSW,DMP1,FES,GBP2,GBP5,HLA-DMA,HLA-E,IFI16,IFI44,IFIH1,IFIT2,IFIT3,IRF7,ISG15,ITGB3,LGALS3BP,MMP13,MMP9,NKG7,NOS2,OAS2,OAS3,OASL,PHF11,POU2F2,PSMB8,PSMB9,SAMHD1,SP110,STAT1,TAP1,TNFRSF1B,TNFSF10,TRIM14,TRIM5,UBE2L6,USP18
IL1RN		cytokine	Inhibited	-4.45658	bias	6.91E-20	218 (18)	CCL2,CIITA,CTSS,GSDMD,HERC6,HLA-DQB1,ICAM1,IFI44,IFIH1,IFIT3,IRF1,IRF7,MMP9,MX1,NOS2,OAS2,OAS3,OASL,RSAD2,RTP4,SLC15A3,THEMIS2,TIMP1,TNFSF10,USP18
CD3		complex	Inhibited	-4.46849	bias	4.50E-25	210 (21)	BCL2A1,CCL17,CCL3L3,CCL4,CCL5,CCR5,CD2,CD274,CD4,CD53,CD69,CD74,CH25H,CORO1A,CTSW,CXCL10,CXCR3,CXCR4,CYBA,DOCK2,EBI3,FCER1G,FYB,GZMB,H19,HLA-DQB1,ICAM1,IL21R,IL2RB,IRF1,IRF8,ITGA4,ITGB7,KCNN4,LCK,LCP1,Ly6a (includes others),LYN,MSR1,NAIP,NOS2,PLEK,PTPN22,PTPN7,PTPRC,RAC2,RHOH,SELPLG,STAT1,TFEC,TLR2,TNFRSF11A,TNFSF10,TRAF1,TRIM5,TUBB1,XAF1,ZBTB32
ACKR2		g-protein coupled receptor	Inhibited	-4.58258	bias	7.98E-28		CCL5,CXCL10,Cxcl9,DHX58,IFI16,Ifi27l2a/Ifi27l2b,IFI44,IFIT1B,IFIT2,IFIT3,Iigp1,IRF7,IRG1,ISG15,OAS2,OAS3,OASL,Oasl2,RSAD2,STAT1,USP18
PTGER4		g-protein coupled receptor	Inhibited	-5.18902	bias	9.17E-51	217 (17)	CCL2,Ccl2,CCL3L3,CCL4,Ccl7,CCR7,CD40,CD69,CH25H,CMPK2,CXCL10,Cxcl9,CXCR4,CYBB,GBP2,GBP4,GBP6,HAVCR2,HERC6,HGF,IFI16,IFIH1,IFIT1B,IFIT2,Igtp,IRF1,IRF7,IRGM,Irgm1,MMP13,Mx1/Mx2,NCF1,NCF2,NOS2,PARP14,RSAD2,RTP4,RUNX2,SLAMF8,SLC13A3,SLFN13,SLFN5,ST8SIA4,TAGAP,Tgtp1/Tgtp2,TLR8,TNFSF10,USP18,XAF1
SOCS1		other	Inhibited	-5.3334	bias	2.55E-37	201 (18)	BCL2A1,CCL2,Ccl2,CCR7,CD40,CD69,CIITA,CXCL10,CXCL2,Cxcl9,CXCR3,FCER1G,GBP5,GBP6,H2-T24,ICAM1,IFI16,IFI44,IFIH1,IFIT1B,IFIT2,IFIT3,Iigp1,IL2RB,IRF1,IRF7,IRG1,IRGM,ISG15,MMP13,MX1,Mx1/Mx2,NOS2,OAS2,Oasl2,STAT1,VAV1,VCAM1
TRIM24		transcription regulator	Inhibited	-6.26522	bias	2.35E-46	144 (7)	Apol9a/Apol9b,Bst2,CMPK2,CXCL10,DHX58,EPSTI1,FAM26F,GBP2,GBP4,HERC6,Ifi27l2a/Ifi27l2b,IFI44,IFIH1,IFIT1B,IFIT2,IFIT3,Igtp,Iigp1,IRF1,IRF7,IRGM,Irgm1,ISG15,LGALS3BP,Ly6a (includes others),Ms4a4b (includes others),OASL,PHF11,PLAC8,PSMB10,PSMB8,PSMB9,RTP4,SAMHD1,SERPINE1,STAT1,TAP1,Tgtp1/Tgtp2,TLR2,UBA7,USP18
IL10RA	1.765	transmembrane receptor	Inhibited	-6.3712		7.58E-36	169 (12)	ABCG1,Akr1c14,ALOX5,BATF2,CCL5,CCR7,CD300LF,CD40,CD69,CFB,CLEC12A,CLEC4E,CLEC5A,Cxcl9,DCSTAMP,FAM26F,GBP2,GBP5,GBP6,Gbp8,H2-Q8,HGF,HK3,HLA-A,IFI16,Iigp1,IRF1,IRF7,IRG1,IRGM,Irgm1,ITGB7,Klrk1,Ly6a (includes others),MLKL,NOS2,PSMB8,PSMB9,RSAD2,SAMHD1,SIRPB1,SLAMF6,SLAMF8,Slfn1,STAT1,TAP1,TAP2,TFEC,Tgtp1/Tgtp2,TLR2,TNFRSF14,ZBP1

## Sheet: Fig. 1D DAVID & heat map 
IPA Canonical pathways; down regulated genes in feet at the indicated days post infection									DAVID analysis of down regulated genes in day 7 feet
(-log p values are shown and day 7 values are ranked most to least significant. Only pathway with 3 or more genes are shown)	Day 2	Day 7	Day 30		Not significant				Category	Term	Similarity score
Calcium Signaling	0.508584	13.0599	2.637					1	UP_TISSUE	Keratinocyte	1
Cellular Effects of Sildenafil (Viagra)	0.356397	5.70052	1.08087					2	GOTERM_BP_FAT	GO:0007398~ectoderm development	0.90669
Actin Cytoskeleton Signaling	0.692527	5.08157	1.65779					3	GOTERM_BP_FAT	GO:0008544~epidermis development	0.795367
Role of Osteoblasts, Osteoclasts and Chondrocytes in Rheumatoid Arthritis	2.00739	4.97448						4	GOTERM_CC_FAT	GO:0001533~cornified envelope	0.660256
Agranulocyte Adhesion and Diapedesis	1.81509	4.17917	0.400541					5	GOTERM_BP_FAT	GO:0030216~keratinocyte differentiation	0.660256
Protein Kinase A Signaling		3.90542	3.19947					6	GOTERM_BP_FAT	GO:0009913~epidermal cell differentiation	0.660256
Hepatic Fibrosis / Hepatic Stellate Cell Activation	3.08089	3.69707	0.408926					7	GOTERM_BP_FAT	GO:0030855~epithelial cell differentiation	0.590734
Basal Cell Carcinoma Signaling	1.38223	3.41361						8	GOTERM_BP_FAT	GO:0060429~epithelium development	0.533451
ILK Signaling	0.500629	3.14597	0.812874					9	SP_PIR_KEYWORDS	keratinization	0.492823
Atherosclerosis Signaling	0.422377	3.01799	0.225164					10	GOTERM_BP_FAT	GO:0031424~keratinization	0.492823
Epithelial Adherens Junction Signaling		2.99918	1.03971
Regulation of Actin-based Motility by Rho		2.71704	0.310058
Role of NANOG in Mammalian Embryonic Stem Cell Pluripotency	0.488135	2.24356	0.25793
Glycogen Degradation II		2.2008
PAK Signaling		2.17399	0.316718
Human Embryonic Stem Cell Pluripotency	0.74565	2.15808	0.197534
Role of Macrophages, Fibroblasts and Endothelial Cells in Rheumatoid Arthritis	0.992769	2.11067	0.426872
Glutathione-mediated Detoxification	2.07253	1.80277
Glycolysis I		1.76639	3.67355
nNOS Signaling in Neurons	0.374148	0.879099	2.20521
Dopamine-DARPP32 Feedback in cAMP Signaling	0.554991	0.870071	2.05689
Protein Citrullination		0.862827	3.12109
G-Protein Coupled Receptor Signaling	2.15952	0.336776	0.245332
phagosome formation	2.19772		0.25793

## Sheet: Fig. 1F heat map data
	Day 2 lymph node	Day 2 feet
Upstream Regulator	Activation z-score	Activation z-score
IFNG	10.828	13.0757
TNF	8.413	13.0775
IRF7	8.381	8.97671
Interferon alpha	7.875	9.29695
IFNA2	7.638	8.02857
STAT1	7.361	8.5187
IL1B	7.214	10.5002
IFNB1	6.845	7.42686
TLR3	6.64	7.46259
IRF3	6.638	6.83719
Ifnar	6.453	7.42177
TLR4	6.352	7.93082
TICAM1	6.349	7.97013
NFkB (complex)	6.253	9.72225
APP	6.235	7.42374
IFN Beta	6.173	6.16098
SAMSN1	6.172	6.7082
IRF1	6.016	6.67446
SASH1	5.916	6.16441
TLR9	5.906	6.72113
PRL	5.896	5.92424
DOCK8	5.831	6
IFNL1	5.821	6.22247
MYD88	5.797	7.61581
NFATC2	5.664	6.09772
OSM	5.373	7.03944
TGM2	5.349	6.51996
Ifn	5.323	6.30807
IFN alpha/beta	5.308	6.03739
P38 MAPK	5.147	6.2955
IL2	5.143	6.44309
IRF5	5.135	5.82059
IL6	5.094	7.08533
DDX58	5.042	5.30198
IL15	4.785	5.46627
CHUK	4.784	6.57351
MAVS	4.658	4.85093
IKBKB	4.607	6.71276
CSF2	4.571	7.16084
IL1A	4.514	6.39491
STAT4	4.473	5.70053
EIF2AK2	4.359	4.88656
Tlr	4.33	5.47539
IFN type 1	4.309	4.20383
Ifn gamma	4.293	5.19557
PDGF BB	4.285
ARHGAP21	4.243	4.69042
TNFSF11	4.215	5.8292
IFNAR1	4.204	4.90362
TLR2	4.188	5.28878
PARP1	4.186	4.71844
IFNA1/IFNA13	4.165	4.86344
IL27	4.085	4.38989
CD40LG	4.048	6.60606
IL17A	4.038	5.97603
IL18	4.033	5.57316
CSF1	4.018	4.48235
TLR7	4.006	5.17286
Map3k7	3.869	4.45276
RELA	3.81	6.89415
FADD	3.687	3.85664
IL12B	3.673	3.80001
SPI1	3.652	3.59759
JAK2	3.648	4.3607
NFKBIA	3.64	4.25886
NFKB1	3.627	4.95615
IL12 (complex)	3.611	5.61198
PAF1	3.606	4.47214
TBK1	3.549	4.26721
MAP2K3	3.536
TMEM173	3.526	4.26582
IKBKG	3.518	4.85895
JAK1	3.503	4.22627
IFNA4	3.491	3.74487
TAC1	3.477
IL7	3.388	3.18848
PI3K (complex)	3.382	4.4597
STAT3	3.301	5.91131
IFNE	3.286
NOS2	3.248	3.42179
CCL5	3.211
MET	3.207
PTPRJ	3.207
CEBPB	3.205	5.49851
IFNK	3.156
TNK1	3.148	3.59211
IL13	3.141	4.1238
FZD9	3.13	3.42929
STAT2	3.11	3.88709
TCR	3.105	5.19619
Ifna	3.1
CD14	3.077	4.3626
PARP9	2.975	3.29252
ITK	2.83	3.28692
CRKL	2.804
IFNA8	2.796
IFNA10	2.784
IFNA14	2.784
IFNA16	2.784
IFNA5	2.784
IFNA6	2.784
IFNA7	2.784
IFNA21	2.78
LDL	2.639	3.104
TNFSF10	2.622	2.978
IFNAR2	2.53
MAPK9	2.526	3.14399
CD40	2.521	3.28369
CD44	2.504	4.22118
PLK2	2.496
PLK4	2.496
IFNA17	2.425
MOG	2.407	3.09888
IL12A	2.317	3.06666
MAPKAPK2	2.245
MAP2K6	2.172
IRAK4	2.147	2.42184
PPP2CA	2.06
TGFB1	2.019	2.3318
Immunoglobulin	1.984	1.09126
ERK1/2	1.877	3.64081
IRF8	1.834	3.4556
IKBKE	1.738	2.33324
IL4	1.73	2.62812
TREM1	1.693	1.86726
TP53	1.582	3.39713
Ige	1.324	1.83648
FAS	1.239	0.0885067
CCR2	1.194	1.70034
CREBBP	1.164	2.55107
STAT5A	0.963	1.31163
IgG	0.945	0.293696
IRF9	0.909	0.664863
ATP-gamma-S	0.842
NCOA2	0.679
CDKN2A	0.571
TIRAP	0.146	2.1219
WNT5A	-0.019
MAP3K7	-0.412	4.45276
prostaglandin E2	-0.471
IRF2	-0.629	-0.675412
IL10	-0.652	-0.660514
STAT6	-0.782	-0.753435
GAPDH	-1.5
BAPTA-AM	-2.077
NR3C1	-2.799	-4.05118
DUSP1	-2.847	-3.49186
TAB1	-2.897	-3.45619
CD28	-2.939	-2.35391
TRIM21	-2.948
SOCS3	-3.167	-3.76615
DNASE2	-3.394	-3.39476
AG490	-3.593
USP18	-3.683	-3.68295
Nr1h	-3.745	-4.31477
IRF4	-3.929	-3.60152
Irgm1	-3.978	-4.31524
MAPK1	-4.265	-4.99141
mir-21	-4.582	-4.82254
CD3	-4.878	-6.63289
ACKR2	-5.099	-5.2915
IL1RN	-5.221	-6.1612
NKX2-3	-5.831	-5.28185
SOCS1	-5.931	-6.24222
PTGER4	-6.475	-6.21058
IL10RA	-7	-7.30798
TRIM24	-7.011	-7.35808
